# Supplementary material for: Spatial determination and prognostic impact of the fibroblast transcriptome in pancreatic ductal adenocarcinoma
Source: eLife. 2023 Jun 23;12:e86125. doi: 10.7554/eLife.86125 (PMC10361717; doi:10.7554/eLife.86125)
Supplement: Source data 1. [file elife-86125-data1.csv]

	DKK3	CD34	H3F3A	FAP	PDPN	SFRP2	C3	HLA-DRA	Neg Custom	IL11	THY1	SDHA	POLR2A	CD274	ARG1	PTPRC	CD40LG	PTEN	CXCR6	KRT	CD8A	HLA-DRB	HLA-E	CD276	NegPrb4	NegPrb5	IDO1	CXCL10	TBX21	CD47	ITGAX	FAS	CD74	PECAM1	CD44	ICOSLG	CD3E	CD40	UBB	MS4A1	RAB7A	IL15	HIF1A	TNF	ITGB8	LAG3	IFNAR1	GZMB	MKI67
S397438_001_PanCK-	358.278784286648	190.002795850706	621.783239640137	34.7397164765103	130.932013465756	321.125395409388	456.22372902093	594.001334541882	42.5281266439507	478.199004525754	791.942374727622	227.279404810024	144.782646446139	85.7797265931336	88.6946190737762	156.727388438797	55.7125921591691	303.35412337341	75.2237031434556	157.016401541086	123.69726122749	1336.8215515417	651.42768306179	231.156025653968	54.1942162264373	29.0684220159337	134.925582355819	455.3533574615	74.0836738206034	154.406738397399	127.725667749782	126.197633232823	2412.55797488016	273.313093066273	475.780735448768	154.714642830635	99.7580976873904	84.1122726337783	1549.8116789789	62.2055573160173	273.701087074957	73.3872795369185	205.83691335147	135.461474311561	81.9013330063531	93.9842893590085	110.347896382936	83.368455918539	98.1732955025381
S397438_002_PanCK-	361.684536897865	254.70499550502	554.919439531371	43.6961755721581	121.278422732868	438.087124911505	194.833506835852	358.301749203974	82.3576093702881	419.643845818617	699.948237848484	253.551342862792	123.200818248264	95.3887920440789	131.495712566275	167.609757395888	95.3387755830316	245.205517713856	121.015596933198	150.723049264582	125.403791787913	799.456563817705	412.834349216211	206.007945502017	96.2860704063553	56.7352706095505	139.402815660972	155.201850498596	143.702739156296	213.301960010293	130.62363197837	159.390245990454	1515.03634890319	232.346250618909	398.703548144048	138.712317407601	146.294990414982	90.2717163722412	1523.521498741	124.509538609355	328.573786414646	89.1246793308852	164.557875393208	159.776152094951	114.766746106149	119.845505778715	139.967302924424	111.63048150895	109.687815829565
S397438_003_PanCK-	338.262854122364	427.480768814682	1468.85100698601	101.692897742021	306.680222897571	3409.44568358822	3666.04091745022	2978.08572032187	198.279144536446	1350.95522702804	1699.27942149102	788.369660961842	417.717932808282	274.81137287031	338.128047987555	636.502538436269	216.414144960042	595.130731506423	339.844919375528	275.99626100464	543.327949709293	5807.31524536778	1610.42723353008	505.115523477916	273.557827604474	147.425845402392	299.411191838244	364.214413374221	367.743678016029	469.992686411274	619.639568334341	375.257807839872	10821.76786277	580.666686164304	1315.13140329891	432.464557484763	417.079822127904	266.594313986389	4207.78688670906	307.409574690398	897.503776785627	290.263761262178	642.749449303029	452.328437272719	446.900905297437	363.892051251029	375.102980096717	346.345863757886	293.796725424301
S397438_004_PanCK-	257.586420380437	297.259857544363	851.857603391957	96.416455735671	235.99157910955	2616.99146109495	2551.62635096406	1028.38069368238	138.683843088862	836.819731408486	1337.76871903186	604.410819189058	273.928621618688	220.862601621888	260.296395108135	388.680534916926	193.342255394476	388.736949956722	233.748683549191	265.342589525618	367.3483070228	2158.2931101337	814.438117790924	409.811031918925	205.238346814865	153.922021954976	267.690021745073	304.483001943544	331.41327503766	325.633846027877	325.030313566863	263.239289308021	4065.2544142216	324.879816215421	660.895526638219	302.593324490982	286.766152735511	215.014975109081	2366.10772072208	233.222232349743	561.871021767434	238.250516337891	413.538810197287	314.88894403166	267.800817930946	288.300800885362	270.797488560602	238.250039334033	247.947455128126
S397438_005_PanCK-	203.172303498816	290.724255136622	1236.5226841427	104.371691520591	205.352977218366	3879.72709782995	2376.83989715206	1525.39043795856	113.267372068619	1234.20931895945	1091.71163446632	436.168238275111	256.847506239859	196.236638509618	233.942806664475	366.857202158596	175.497921273623	478.186151699505	232.458600036584	196.604856217114	298.600593937656	3248.97437904023	1157.19312478716	367.57431619668	176.087480441296	96.0661960340897	246.851695158074	249.009200360161	312.843387138101	303.853330931616	244.66894282122	239.014289913045	6089.11428024751	481.735112882671	641.125008681868	296.987760408197	306.498270424253	189.23577179447	3217.03872498118	177.199233463074	539.381724722435	165.363061610083	397.774195725704	275.22336704868	177.382131662038	199.067714921972	269.642957755982	223.497591398263	161.633129059419
S397438_006_PanCK-	189.390744624108	198.093316393645	1047.82359558791	41.486456942109	182.238235354588	313.710353750533	767.933695526668	428.140678990987	107.388388390804	1504.51448417823	436.018153850051	450.508419790961	233.440072607175	201.247709725497	217.503859375672	255.35964395002	131.167338974154	425.229021754013	190.234098822742	213.599248264946	294.080501754508	1128.93238067314	609.882838249021	216.961354216631	180.621506706927	94.95231660973	175.275800917343	198.897477079468	364.293738264355	250.558640848018	170.003646565999	194.606104565227	1775.0725452523	278.873812209868	576.379246377888	219.554731937114	252.676080622592	148.129251392271	4088.14540906971	178.999452905623	389.840545341874	187.652056288581	231.933895534192	263.5681223244	148.702424942084	210.278976271983	226.693250262302	214.435415520689	172.824612495025
S397438_007_PanCK-	49.7840718051363	201.454398844181	1105.77205852371	27.5840190123	126.709421165896	945.43451762105	1593.39610693879	1184.659009924	68.5319618468852	1008.67071640263	337.344048964572	373.900711992406	207.028023178014	108.619182266724	152.49108961073	916.027317834839	91.276679331622	285.658865505437	153.024971240738	145.373954395597	272.836575268853	2266.52224028713	1548.04314288285	176.753967567063	90.2642568430652	63.9970395939416	142.457120886204	144.19391833119	175.728961875713	421.305023695873	160.131624469781	156.098687746048	7477.99452796727	296.917315703408	1084.7384285579	216.161823506153	315.752648187273	232.271220874867	2101.54757449495	1126.87931536778	363.493592188019	136.274551316896	257.141347700606	207.802169488216	108.23386410783	124.658299523665	188.335314326013	120.973933539423	126.990128803885
S397438_008_PanCK-	24.6843104529146	67.6768076787398	320.28137845044	7.13578142898376	37.2266480872795	167.248816012098	475.766350561932	339.371238326702	29.7481760452818	389.678811028561	72.4964110812139	140.174984180297	96.2989159005173	44.580109342573	54.1034149255128	288.134506796428	42.8851911163201	111.404630773036	65.5517174049383	44.1617911199539	112.385631932446	631.015070058476	531.725379262424	53.9202000303418	48.100682050421	22.88828811169	86.866847864152	63.0348028326903	82.8497783435111	113.78196463941	79.1675203557736	45.4842570492789	1956.3927820808	101.520604291838	372.4754233728	75.6450985841022	139.828610513472	79.6896449933989	674.190876447061	204.2815781371	113.589060829059	63.3119002150909	81.3029094048342	91.5480553902137	53.4888570198704	100.225292384827	61.1148771183022	57.3742778836594	55.5222978611216
M397401 RNA_001_PanCK-	645.166492223237	299.683642834523	1419.26605026538	157.87357400871	753.495500129248	5401.42754459596	908.110161756015	1038.62844999693	133.16857377364	754.593274097969	1875.05493167128	562.711309417044	310.721916257004	257.894919955201	308.657544482669	238.362343666095	379.542681007873	514.802988401112	208.023316129887	427.558120203153	280.587525688804	2289.29004885428	1117.39945497255	882.981482575295	179.830337749043	89.8274594976866	286.99172090269	219.478135131982	341.922924076979	379.116684936459	326.06413790189	305.612610334896	3490.66848229919	339.925241115501	535.907095734505	288.189954136635	245.459817482076	196.840161529461	3587.63721825257	174.267300979588	691.0437785719	270.058707386922	606.944684001336	190.995455186532	226.484310658448	249.671177781421	250.312099035994	266.493004493951	245.689630563097
M397401 RNA_002_PanCK-	467.966474572982	306.531521442036	1028.11143993781	108.340346763269	671.965300335245	3955.95196404135	1103.34984010318	714.64678564676	123.723399513753	996.261136445133	1591.61296411222	471.342761927531	267.57823450726	230.890499630441	249.509383475457	224.332202568972	212.299650261767	422.866002125457	222.213068199281	305.265245997684	286.256171839219	1686.43589674925	974.100225609009	616.209507976963	180.53081002781	69.8343145399539	225.380812280483	222.448723677992	342.816392692692	280.521439542595	284.577713473285	227.442948328573	2286.09353983494	298.1475475027	512.420591611368	195.711401844268	219.130711952699	181.594300447827	2657.98484817329	133.415688639472	565.763924304729	257.800294488207	514.487878151386	193.333622940231	210.810973093659	215.092859171466	240.595678737685	204.825779500623	199.791093391121
M397401 RNA_003_PanCK-	132.369015916129	418.573259789854	661.142607738003	77.4117565849989	317.418574834289	4126.69275078079	5029.1894697066	1801.80197641399	132.488497502079	589.302405754439	1301.71688184995	408.619933826012	242.644800057286	178.138357294762	198.882590068689	320.145824468703	175.876119971539	251.489924969015	206.711989879892	184.007183538324	245.572090090957	2729.28004616561	981.762695767963	401.708251369464	148.519156310436	70.508439135084	212.240158227112	158.420439174834	212.652371094687	264.656951419217	257.202037829097	219.104624392152	5993.16077359249	252.861525307116	354.627207225269	207.358699570961	177.434930547611	135.965388657461	2692.46342613409	203.488382194971	444.029426944454	137.374693134104	464.291040520187	154.813722550194	162.295054831096	217.16919352886	207.194932657905	229.528608486667	149.097181942158
M397401 RNA_004_PanCK-	238.274092657535	507.596166257308	935.168747584736	133.926111694078	532.581295755853	6078.16429074346	6035.87858527298	989.068126648408	180.749685536256	743.129332872073	2191.35430071344	575.973378450781	405.732594489053	420.048884168746	606.972922176791	379.651581607696	676.919668886312	462.489725310625	338.183139815453	374.80909535054	370.819264926303	1700.13624704169	795.557555400627	562.517973228272	335.994086924302	156.757882530512	497.512448055623	319.176043322636	394.363835885944	538.426902182995	417.979761476416	349.694812345078	3469.98613745192	483.688986322725	430.786340237033	386.435032972084	466.538288917687	315.400714393599	3015.07106044063	354.075392307366	776.49939322539	316.012930360608	698.570395101894	285.690970814647	356.923866223418	392.131012488785	333.932336203531	372.045513274186	654.762222909613
M397401 RNA_005_PanCK-	238.708019031214	345.851768036246	910.722129838751	113.349697478959	528.940113489365	5550.82873199967	5105.78845890162	1587.65092623138	181.240530450004	651.374111999189	1815.44354928229	517.617378268104	316.677374120906	255.212325043137	301.270578797282	378.213879924087	305.520707820541	317.994875056914	261.851440423784	250.116747010868	366.375764395788	2705.46241179852	976.109752306435	544.641399021134	195.39592307645	118.250971607074	269.893606540431	206.671706228407	282.719835241933	310.853370570919	389.237750693325	249.611300288353	5177.80391406275	366.427372694807	514.461507253985	257.359301687326	273.758747454032	217.330644319234	2582.22250670815	216.300439146231	551.761046763342	275.768193801021	613.660280086278	240.340785553872	302.271130279166	262.624245117856	278.301502823848	256.344162801209	302.484152242902
M397401 RNA_006_PanCK-	167.041472638576	531.587780090365	2992.00769941207	67.4982725454813	390.728198926487	2589.68704639362	4442.44381565596	4338.55583074162	117.744658601998	1921.18721541775	854.91946846609	1246.13300508012	644.99640763578	255.627902319158	310.398081874407	2151.71756333185	296.926063606471	649.490462181346	439.520267396283	288.060499453372	742.205860454546	5678.07737419987	4845.97915432964	384.960013389713	151.042747831359	92.3439762415357	372.534629136719	218.314836070865	399.984916785276	1088.88136088777	519.696122849946	372.494138571192	21825.6308869988	594.659369898429	2193.01799897733	395.381197729675	831.992804113539	522.749485829431	6943.90583109526	2078.55958991047	791.287478652083	370.883247020136	935.067171490359	413.228596760023	280.939399524903	353.786756996289	421.076608018523	457.612674578629	235.114441391142
M397401 RNA_007_PanCK-	214.361123250859	310.266536770582	927.076134061231	96.0513058377958	391.185163471257	3569.82701570718	2787.08486004461	1364.92188881144	137.349247533982	656.546717369086	2135.21374453636	390.06148755895	373.255733077111	423.19504113056	605.410122391196	365.808565507063	851.46468792338	497.543848888731	252.820956235862	450.103277738824	269.544109783614	2348.11829366057	821.792415484132	481.326851354322	365.130201852711	162.890184259747	553.06180055433	323.746777893643	341.248104089372	497.840639215772	404.316386028486	293.744982976114	4384.66788102444	436.897553196804	516.911085900905	409.757298734572	450.101837228862	320.829240405604	2310.43321428082	280.426246644833	676.95705026198	279.046363305928	633.449177883806	311.003607776284	253.815100565772	333.315429774853	322.347352802183	285.35948578253	734.781963196141
M397401 RNA_008_PanCK-	516.635328125648	258.916066323877	1391.12108535022	119.086528417569	578.693178773721	5005.6834009572	1092.2885370329	820.600349214498	145.525393896267	774.29855395659	1565.21813374923	762.90141409338	469.773529238715	522.249528142242	584.602568383938	508.282119467461	656.317861383359	732.234460387347	449.40025202678	676.096585807526	475.573430563817	2004.8297807998	972.413062846234	923.329846419589	421.067223686637	241.477681993069	588.075555034977	380.687423813905	646.504975172114	565.511818923806	600.698582520626	547.597898097255	3296.43881011685	482.022286691714	781.736773316263	546.109130740567	484.415095148549	431.733108096729	3153.89380029056	462.178587888291	879.635072505059	565.758620107512	800.735530662601	439.67629922927	436.287428981434	515.736952669474	515.308376505315	398.947144580306	496.803859249874
M397401 RNA_009_PanCK-	136.03287355202	409.302804650133	2021.01672062619	58.8011120721016	293.833007997525	1047.70857384074	3481.47336083973	2567.7679756505	81.6933973697446	1307.81250914829	687.920281376283	796.330999307196	447.307350341019	205.670189685713	209.837817712203	1387.64932462891	254.171553584863	530.92635849744	282.381242770237	264.740476166333	495.032106107748	3646.77854593561	3100.15577692093	357.447925476263	94.8156281701933	62.7987104810971	251.84386813287	185.474480393224	251.086673727242	741.98713494756	440.535272387007	331.258604033404	13861.8801749117	488.785243779514	1567.60403206092	258.224884340323	605.569389215523	436.12319527603	4890.38579237255	1281.23283255415	617.933021782275	215.480842186224	583.436263142129	311.280319318089	199.597843195976	264.753036094977	301.038832177848	219.533517317083	198.289960598582
M397401 RNA_010_PanCK-	83.4301600883915	274.80636986863	1467.16848747677	68.9786453856774	219.917743442386	1175.67161386706	3395.34902321987	2067.25350617065	60.955143096099	981.661357055499	438.886723655321	616.410382384791	333.233140539533	135.216364172836	141.688925759997	991.513052014175	134.76566182675	328.198249792713	182.66887478207	146.467607406988	248.877538670607	2803.25260065371	2346.90003630052	218.727948117236	92.2367747700953	34.405461315567	144.137133088551	124.761500983666	216.915814174133	533.562926597538	273.057963045504	171.16648292269	11360.7316360071	305.5294560759	1255.16679280346	183.915403056415	312.655632590993	333.237793601144	3830.09398108869	1562.84204585759	448.573839026469	167.584183834652	454.234630609174	243.05223661211	157.738611837064	174.539454049569	163.857103810884	138.061022681735	112.340436247185
M397401 RNA_011_PanCK-	424.635018243847	332.292040860966	1538.94425754417	153.913529107779	897.707051701727	5581.15220580849	1706.21253696457	1704.92682564601	152.566496244694	1057.23178927092	2470.78682591656	708.740847664273	490.529887833997	388.644896923682	561.104625927359	442.259832173128	656.029421337814	764.587328502867	332.159314076736	500.952800961449	329.430549524274	3140.59419943672	1362.68192150871	926.472269431365	319.179746891544	180.343601716443	498.596074836073	432.090398433983	436.603709566433	593.797127600832	650.138216132558	336.380741230652	5304.55179328183	516.411601361557	786.93919411145	378.162994990259	446.535044902389	301.781029265236	3784.05520453173	308.774742969744	898.036416798942	298.880485922654	871.151103582405	302.590514234184	317.571756493187	371.301123432558	319.33879233722	315.292891455187	618.59670773288
S397409 RNA_001_PanCK-	244.430024276742	210.334641728352	668.431150097676	57.1370740546815	239.606494527027	1670.44978243741	1004.01984435896	814.822408343808	138.963247750913	561.265941243278	628.638769441947	402.860522569671	168.300407607497	192.095339017752	190.399031693686	223.875478638057	211.747176449629	302.782040318955	211.679396076286	267.190718698298	206.723133267279	2341.11956183025	671.692293889948	373.711808122238	160.592294348297	115.167664984451	201.889667886672	179.749890154422	277.205393272946	190.300076143108	336.158001899869	207.818903560036	3312.51748316232	245.347597990855	290.276152787266	245.052695694169	243.004513560778	154.290633982677	1568.55799849887	208.854177475665	399.722479264785	215.526587304141	316.379138024032	224.69530993335	219.336544513068	190.362088565389	213.998506095789	242.787331959639	131.043069348884
S397409 RNA_002_PanCK-	241.944600483467	286.942595831411	683.915049968261	84.4791434881483	270.209925446824	1732.30710877647	2229.23241179153	1852.89880360177	187.036513187014	814.838205216092	878.450330804037	505.455022194611	245.081803344288	230.562567035676	245.472399350825	337.118243081161	151.345356389487	305.962824183366	233.104138550918	300.216631141768	330.826116625054	5082.47521918782	1321.88576222267	434.730986880777	184.247294041855	124.543925952702	231.627707631182	273.05218117328	306.595737672837	243.367144782414	526.900208408842	266.726781440889	7718.9782714124	333.487274453585	456.134391676913	292.799786074206	282.646710271711	158.383997283453	2078.29670002925	262.014542497057	511.492126261912	222.331593170491	446.307198206535	189.991645693598	223.675995765356	211.850069476884	230.206788460144	265.179157473558	203.159193652216
S397409 RNA_003_PanCK-	278.81227005826	431.796362908291	949.363090125658	65.8958594162767	252.617522308108	3551.48062128009	5678.41274490185	2460.53922322315	221.592356718857	993.335083642937	1592.92456075352	592.367064698667	287.819083019032	256.142321483531	284.471432545048	362.460444478161	189.577478511417	398.078821133475	278.046271432128	291.391631830762	330.886029596915	5992.26748094746	1528.47471092074	445.366338469014	191.651887885633	150.126875795396	292.493470712909	445.953610160347	277.534879996874	280.655459297001	448.130550227863	280.606299222319	9391.88023523645	501.486273685113	584.224526776941	319.475795384704	314.592595233917	171.661741374631	3066.81431866499	268.017948017917	644.175778016362	258.759979828819	440.389134475096	260.923046398322	275.972589205106	278.334425076033	285.453339670778	267.687545175947	209.75069523053
S397409 RNA_004_PanCK-	250.774371989859	324.430276968496	833.186214673343	91.1889641898147	243.655220312623	2228.89923370149	2289.49110064785	1640.56591959154	178.235095746443	901.675854139589	891.387172965829	499.77573954069	228.598371118409	253.251329988768	283.468209330531	320.056580842911	158.90666429267	372.452346660842	251.447309779835	331.540406050874	295.92498321215	4518.69604181459	1235.23219961622	478.222055408969	199.247636792474	147.273037123556	279.554174264258	290.436885779111	268.778435034412	264.67914560035	471.091050632584	293.589266530708	6895.63511064109	343.747323274642	470.043443989087	287.434496350555	324.295250890792	160.705941568097	2214.78672879113	264.543945241197	529.054245330855	225.78566611107	404.145451745262	252.977490998364	229.761885433481	236.766332857578	274.599209508796	274.557900335193	206.487531043651
S397409 RNA_005_PanCK-	235.149800306468	401.522702150069	772.153022616479	64.3882604242336	285.62684029292	3073.57998865746	4356.32267164425	1891.67714997761	164.18491569013	749.868536682604	1277.70727861638	461.47178079128	242.022459872307	218.034272542152	222.003451125372	285.468868713385	147.025315236817	407.929050583797	250.542660520215	222.269853107631	309.949114265906	4256.26061829299	988.311922099237	342.881235090209	140.888583031502	102.956910513566	217.010686919541	237.800241896447	281.009874789906	258.447285008917	335.056438872143	288.858629946374	6887.79121349536	364.078466639931	430.760440352368	257.473935792379	297.936872401653	151.662357981953	2675.11351064858	244.803065503652	455.772643538063	222.295087444117	401.03198718507	173.115764334676	223.639269294855	234.710856936954	224.097929444668	263.954012496692	187.810479477067
S397409 RNA_006_PanCK-	90.171309479025	149.580424790629	315.657550632458	45.3292850788921	126.839333998086	752.953892214373	2209.4834571851	607.486758476	61.196876160341	292.448405048088	772.103428772588	170.059272174132	109.537451127363	89.4757755503791	91.4915291613142	110.20816227138	52.561491918537	188.128226241408	95.0527121404259	96.4250507101944	90.1662244680784	1538.03522692307	332.869398858454	150.446746103163	42.3511457193415	58.4238963460766	131.431738538476	210.172244648914	145.495123850712	89.9134249585755	102.71548878439	113.823012156618	2091.46979339467	85.6594775910927	179.436999532138	101.802945607717	102.459333809261	32.2454910065793	1322.77041802771	77.4343953235467	184.437374463607	125.110036199042	169.238875673823	45.2520383309986	70.6393936853272	49.3413832167047	84.7776941242519	109.468715972771	66.5683072501269
S397409 RNA_007_PanCK-	305.937741477226	643.671273538203	1816.66001559552	83.8884392583841	369.657913566002	7180.51596424805	7684.04432836275	2306.97784359052	236.355601924844	1783.66738709919	1825.93752679483	875.74103253909	491.691690925432	364.182717727095	351.231443641193	671.046808017946	281.082289864988	744.214558950431	398.883676033211	362.069602963562	581.101788520231	6223.8040623771	2498.23084044673	557.287394752908	275.731115161601	182.773059734422	399.514061099682	357.982390029914	499.496629857217	555.849718485561	457.183490983359	479.788478054685	10618.1679228161	746.528093444224	825.582985154067	463.084608168159	530.966288213126	307.330301464847	5106.46745770778	529.600328650959	915.549859663772	393.218020014571	638.871324102054	388.099271178946	336.070366221623	393.32166828584	415.835887562097	450.245931832113	298.104447123293
S397409 RNA_008_PanCK-	346.154812791641	658.293111968553	1384.85624762297	137.943586948039	532.324623212037	4707.99601689119	10228.0048726511	3350.42251723514	331.458524953416	1351.46461892645	2332.44517588754	739.422661985409	409.739885619561	344.354338777293	384.70081031294	518.376985155911	299.422343325679	648.381323233417	383.724759560409	358.187735284564	569.167411934989	8192.03059857615	1715.33535611113	722.56091200866	297.406770276496	194.187613836152	404.489735481417	345.977278962427	478.744333421312	410.588971895752	535.769954769211	419.643600232844	12965.6362294071	621.774584397083	681.51814360638	444.233787750546	493.470397188872	250.200057885062	4766.86655916626	380.981466844589	852.141840274269	412.040448922159	754.414136733022	406.286196680338	372.96645151078	361.320644978561	385.59585349158	446.417446373677	306.187016322637
S397409 RNA_009_PanCK-	47.7958880722124	137.041420872257	680.556326607948	14.9436728762045	95.3193178661207	263.478169845084	1441.53422475323	1036.29600533793	66.8230883928713	825.734049530598	176.992727194549	291.357193280058	143.179060073684	89.6934962919427	81.058895870373	451.165366223044	57.7074264937117	198.638555749496	119.105004000581	116.349616104589	128.422261038873	2106.46902391563	1197.36760928529	132.401910505896	50.68511447407	48.944491980504	86.0916215667241	89.024835048411	128.982246853438	249.995649147783	116.598478491868	100.25374309891	5677.80924899246	170.859621140889	533.584839167613	125.295534963016	184.708408293869	125.869773705739	1384.75870572618	746.811575642382	232.768602445696	103.384665092182	191.696512282652	84.2439924495327	90.8591488811799	76.9035095407707	101.009534150242	124.393575458497	57.6904701576647
S397409 RNA_010_PanCK-	113.694999926775	425.192631308305	1263.27739412603	48.3875910250542	223.857826538942	1356.46439869514	4027.76179072061	2496.89229838757	126.732664922903	1334.89089549944	866.190458463962	614.765254055726	323.31213153641	194.916430166029	219.829442953428	771.935878413511	199.117251100972	408.406211480157	236.311957046828	244.529845212489	364.166567690059	4064.54975581973	2869.95680315568	265.872984280969	132.405693271253	86.1603958162678	237.213288810994	203.460113897278	339.04212960333	616.365212392259	343.916707785872	215.118719368746	12720.352347876	713.396111837992	733.94177469507	335.084678781577	444.268860247207	389.330035650224	3069.61221333935	1171.84552498753	559.510579067872	314.346228039899	431.199289135306	304.869507122271	196.148795744811	224.91673966395	270.313868465301	271.104359923665	117.052559767606
S397409 RNA_011_PanCK-	129.138956158452	381.762472059741	1159.08849699955	31.8038050408217	217.504599408454	1168.71012305708	5311.72155717126	2045.5268102637	128.061347954148	1389.98539291798	609.564234058657	590.438926035147	284.543775486606	200.395309516893	235.86064800847	764.277082211374	187.77599551435	406.016900262525	234.388716995737	259.189017903175	383.50037275412	3461.83918600344	2577.21440159363	253.587389121212	137.369829644995	95.5059695636034	232.729620556339	302.342968034332	311.186325141283	570.8221482338	352.057354875723	215.866415730437	10967.5536913638	472.601916553776	870.851110616162	364.361648148672	473.398367262358	314.326687482059	2758.96723349276	993.236170825577	465.339583082641	339.021619763498	415.527468451332	318.743133613568	182.084683267462	228.604126262381	243.45371893568	221.218994646642	141.501943296344
S397409 RNA_012_PanCK-	131.228510719596	262.243902293395	1043.28273590774	43.7352421201162	191.681620378046	442.388685947791	2755.73825992809	2776.29408153129	120.733200094464	1054.72271276371	413.226487470366	459.314740397593	223.193251518854	130.014928274905	179.294877563412	734.750913755491	143.978090294826	305.582852494812	237.026832886308	203.806212995958	483.098236697015	4131.73903026807	2314.16737252421	211.134700963917	134.482480259056	60.9116849058694	234.695920179753	274.620893859437	267.846427800742	476.125357779647	308.259538533555	163.765048666731	13509.2472234142	333.449762717521	741.431175796044	292.443518832039	412.247962095997	319.913946099315	2293.77846369957	1060.59873885196	405.734564031913	220.573848712685	371.708817609632	238.676408273476	166.373649103714	175.186721824027	209.887945824679	205.577617532393	107.356510201434
S397453_001_PanCK-	128.630692521748	174.483448146521	948.109407233557	29.7584885617699	123.457616840145	444.267167136076	1061.01928268457	2323.07516208199	75.1039427336957	454.54146937015	549.538681246333	366.183037100718	202.689281168147	123.886297362449	95.4112733474056	462.406731109769	126.820226377152	262.833886883924	186.819487207159	202.241866765093	289.020272118169	4594.0873583871	1458.42720358779	214.440992704378	107.1266930385	53.2697156283235	176.271801341469	228.909807202108	183.092031534159	236.00434800978	405.477018755386	141.176581873934	9032.42123832933	366.471786482795	576.62480667168	188.415078121309	255.575484618204	143.918235229238	2522.81857413676	157.747875591883	380.408627401483	123.752647313855	269.153996380249	162.026129379385	127.93284862344	138.969014470853	173.798514607501	165.524753685268	85.4968709087238
S397453_002_PanCK-	183.328959458226	274.063843034166	1173.07874025497	73.8525447721531	310.522785259171	1070.05096190656	2414.83281665615	2262.24380051342	175.942872835763	734.972494423589	839.450441374999	547.180469543078	329.354942617916	201.809033828166	245.64520581818	655.588687458919	253.476730540682	397.90409159874	330.53485280578	305.321345163195	509.635029378278	4979.15048707267	2039.47109967632	376.053814390198	221.366085487367	120.056469751674	290.807245785148	350.645280003811	328.8935301833	352.540151910589	444.615644500195	284.127170967535	10076.7059591108	562.73696580393	814.939022600306	291.078352951173	458.282004926265	226.799292911818	2957.56025440164	399.207169001468	559.52395139144	233.751130917125	407.582393001631	323.430932536895	213.855262026041	268.956413020499	269.340454775855	299.290577422281	159.785847278281
S397453_003_PanCK-	178.082307388696	285.618583016398	1268.54155158992	52.9013131341355	268.129724911507	1114.45955107519	4351.35787111716	1807.74947206228	132.842998227574	670.518622607442	1211.46589202873	507.365300800101	327.562125211377	169.47129391003	215.178758646058	518.899009817647	225.179804780259	348.561848475888	273.33892404552	303.64838079294	381.584192391973	3994.30572614668	1332.55914308432	354.014065729846	188.625730205617	97.2742965572093	247.888347993273	193.217557500528	271.372520885611	298.009953745763	373.786101168674	235.654952576017	7899.53453550992	458.145912121634	612.239537158238	300.808394833723	376.829563328598	194.708406422084	2813.62070114174	435.48590945656	479.639660364041	233.929864644252	392.462316851755	260.269819662328	233.720205566285	248.701583864405	217.124107779354	247.501174884085	153.572975912334
S397453_004_PanCK-	157.418426107247	236.807569149912	1222.90348984107	67.4533604767689	246.013650419252	805.334346636743	1816.56290700652	2496.90566677972	105.212693846803	582.753962218225	868.351693704179	476.41715868953	282.061257003761	173.247427952543	183.68183991549	595.878011608617	205.789731481629	350.39400973837	254.757925666858	261.614664970582	325.904462869106	5209.7638916786	1606.38811846323	311.243618577922	171.744795884086	79.8108526794292	232.909189607334	306.831537459199	238.86902115819	330.838743244588	458.398132166086	224.315125621258	10495.7846519243	516.405083930843	741.485661667451	224.29397188485	369.655708962281	178.160746180225	3125.55855151212	426.808963575459	531.424063203897	201.220020326242	454.725096528772	265.491692765989	166.517712567013	196.308790406777	212.496124121317	233.765617367556	143.634666600068
S397453_006_PanCK-	204.275727254379	277.494393357011	1162.95901337217	59.6511538835606	256.804617360923	979.347902134415	4118.35266529013	1430.11960381659	163.873774757965	618.516815347422	870.992699613537	508.381769875272	295.005740782257	181.562891245863	246.966827606923	498.241662591621	232.154539116	414.018119141732	295.556242022378	259.42840445108	390.120704583669	3307.48515861854	1428.06592860399	334.145435487342	199.623653791792	113.552950669533	248.849002524436	220.910762215506	297.482935671884	325.954813970198	323.43312078171	280.604258648976	6619.34353738259	563.450262258769	660.716063259179	261.444937274242	330.252677519666	198.202725829969	2708.18461420701	364.390939651099	533.218417797531	202.744024944016	436.236939004167	259.938050396002	383.047557768548	263.407820500498	230.400295459996	268.282847033312	149.56194755595
S397453_007_PanCK-	137.674593715608	347.499092200073	1366.33058572373	60.5164810188292	222.693781602348	559.517388395763	2859.20741680806	2317.10039681435	111.169955344765	675.900549617646	1015.16953581427	481.512792145331	306.584869802264	155.94697365896	183.662770768537	705.342472131754	214.992571545237	376.32665088982	215.588896277419	242.571417167138	344.768334087854	4910.91489315222	1693.06665686829	364.298995962103	151.754120149624	84.246131187153	300.075417932951	328.273651173968	262.422772628661	366.981402039352	436.923018458352	226.184596209075	10144.3122835167	436.973977926805	726.636267005766	254.775083353086	379.315390766299	205.382651942136	3244.67941392985	499.012979808432	506.241138713043	182.548200181312	422.275762935363	241.322682886369	185.255103342185	219.615802057205	222.234039859456	223.522958395435	153.497414925807
S397453_008_PanCK-	135.498979823141	236.444705809166	1098.64436907942	37.0944883776065	188.013007147885	671.98515550877	2953.24025525591	1354.58886929298	129.17934303762	576.262045922803	749.713777275556	542.278510955585	249.646545575144	154.255091467056	186.385749421166	550.968927751009	170.378384990373	331.200792319651	243.528191416488	230.229214747343	358.729834923925	3011.23762396292	1270.36680062901	272.991864304956	140.350724359526	76.9536283304555	198.889872073895	215.568409801177	287.181397666136	277.531737697698	302.596562459879	224.715775216255	6291.33771593592	325.08362409769	620.039265792652	202.115016201459	380.421300096051	181.542975836074	2381.77209859756	439.538286148831	423.027866261414	181.482222160626	324.534237064277	249.061046049366	168.02350517842	214.397071508976	192.001371976675	202.472939324205	121.335915533946
S397453_009_PanCK-	71.3672161040614	137.549314357295	1659.13113292351	21.2122954994615	129.234344844191	130.242392151588	1076.99259623299	2350.94903461356	67.4435775231603	671.699639884997	304.791780052781	370.924213494282	275.259756033387	92.9557944284366	92.9602612297283	873.591554107974	113.039106397836	382.997222721655	170.461607997038	157.653057195473	184.453019716572	4165.46405994498	1705.12304955239	155.081983399946	78.0164015762988	42.9527788275429	99.1967171382736	97.6664528850398	181.878807505722	420.150923034149	225.478983334156	169.749962194174	11369.2051393443	260.414522420334	899.158852766207	250.458474216326	278.061197538561	261.729722290432	3118.88880490895	1755.72086023439	357.106475919344	127.676329802528	338.681842939944	180.162861062546	88.0868218089121	116.519641750781	179.164688719484	115.783125942299	62.081610515767
S397453_010_PanCK-	73.0817067778367	144.134661280494	1647.17223867448	27.7430444349571	155.092028992797	87.0488481478419	716.191691638833	2132.68115626594	66.1784761957296	612.867403683122	332.515541486936	379.1317148385	268.486736026532	104.767677508261	129.441266281075	993.129935516863	113.531165289571	368.860194689181	153.822547996646	188.770427652649	205.81867576632	4244.62363065371	1531.21357404947	168.833859453731	95.7477083811498	46.1838878812393	136.49051849942	144.041341939095	178.113196236696	489.378080801135	135.058215830567	126.39582812676	11227.7169995582	264.147257370897	810.862662556258	307.770437552381	220.854440442189	276.389026265524	2471.82502933945	2140.34876757449	358.507514931886	147.627463395827	359.663285220627	198.44032430756	131.141249743632	131.429894578586	188.609525679238	150.597896724301	90.4856104186125
S397453_011_PanCK-	143.203452988913	327.998701538151	2512.90670920592	40.5744393955765	233.834789610107	309.534571656592	2613.23223912804	2929.58373864261	121.891987569034	1033.38224720884	717.046991251321	626.744428529305	454.630007648929	162.798028859495	181.831056689367	1427.51658687349	214.535067752427	601.33380775791	267.72420954679	297.526214851727	480.163057756708	5586.58018339674	2876.67126982941	336.936145035899	141.070106402679	79.9849278026362	237.707279895613	203.441368861013	297.453783182323	667.849304868615	393.647330651513	235.561466496871	15056.7561622416	582.538916027629	1329.23355664232	352.299796357922	725.186736840171	371.239175397717	4855.86777814044	1863.27369848198	669.893260583206	220.999672284603	519.328869350373	310.763959453551	188.851394119664	214.464904433167	279.701443882898	206.931083646338	146.349402267364
S397453_012_PanCK-	112.192177247625	273.043627129935	1801.96397751345	33.0592755614967	257.237862693429	296.460384633437	3025.49129533434	2515.96909817282	102.262150387636	841.790773593629	664.275175431661	621.003333836979	293.436726957757	177.574791581701	168.338587331168	890.997287758612	167.08335005881	420.145987528697	221.97343753078	236.981559983922	357.844631910868	4161.54976570767	2014.53227571811	317.69303037681	157.647297756505	76.2458788357113	183.71130301398	169.513224754258	250.856580981688	431.86618173085	359.615131289372	215.935376993302	11696.5209659708	352.375999262461	967.699179346665	299.199885424338	395.353148654251	271.141370150336	3424.81454553323	1163.77656788786	510.283541499915	178.220079290702	525.386444526688	276.147663278745	208.663655417501	177.390478051115	235.877182489055	223.38408295491	139.228437366839
S397453_013_PanCK-	142.542113068609	442.309038070974	3139.80305427623	59.9332273671291	352.925986792165	336.319465946575	3437.96253860748	3719.94657443768	169.852808770026	1486.71939347343	571.839048546345	1126.35995918337	583.044810666273	286.895531711616	284.200309511499	2041.45612497898	267.805952833758	771.809848620723	339.852684718773	395.677521400412	620.087260737358	5831.99714481185	3812.71594489139	408.523197290135	207.832715102464	132.443273876334	299.20472333984	308.256845216944	416.453442469356	916.565401796487	438.937803638375	377.669370018177	18912.2680706927	661.144131997644	1479.94606137641	496.494233093377	783.593197131428	497.826653677781	5531.91862829357	3058.51920870442	902.161501977673	306.804655175755	755.998420854556	475.323655556636	295.823883133571	332.726571570689	405.031209023489	307.195992093905	231.692513014374
S397457_001_PanCK-	422.442187336995	221.28888072228	800.077108817058	69.4930388091045	257.943581348976	1629.52046067362	1158.46292854244	622.921480479837	107.023006158643	374.6887236342	998.314836949472	325.928910681569	204.921830148084	177.16206313549	210.424415116106	191.997334953409	191.679036665989	391.009518884991	178.399507892842	299.521654261558	199.396538086323	921.872257445958	749.408144715649	349.535968470062	148.383069995669	104.725192947999	180.230326938005	220.374408067753	217.725697204639	220.025501543478	232.770696920245	186.336317064722	2017.96844845951	303.413431388772	251.650674939374	201.706218799744	245.614642899592	134.444862416093	2317.89613318796	162.909231066505	483.925441881581	153.239815724704	277.732800713449	181.94859663244	133.757760670365	177.270455978083	184.395750035017	178.367355674765	149.04234665752
S397457_002_PanCK-	404.0172291115	218.030310939701	939.672210051544	71.4907280660814	206.937087258479	950.055785388668	1630.18982834386	1093.33940213341	130.236183825331	455.168092002976	979.416512516125	406.779692398057	219.317824201143	139.69744081819	177.979331816802	274.154536140011	149.495445591175	416.51355570497	185.506880256693	230.495242420333	204.671748629187	1579.77771334294	1087.32092232384	292.508374191846	128.514036240777	70.5760413799029	159.726988256603	159.574246092826	222.314512411963	248.444029267406	234.420758635006	195.443821833791	3972.93855918305	387.63428259015	378.074526610166	186.856873736193	214.479355104226	129.95478111434	2716.95609372371	135.957467867991	493.207500308439	172.270995374207	331.944702091064	174.940803809242	132.544882969968	169.449439788134	189.523939254035	171.372832066521	122.80817126827
S397457_003_PanCK-	422.84710508053	284.701158632582	1431.40609885399	75.7571654517612	419.360910462597	344.285324303641	3678.97918569953	2020.77133967969	149.785548886003	705.570413541266	857.65155094647	555.286115403805	281.512203525775	162.897901558448	170.244445325034	395.344527507026	152.754317605205	615.918514728323	184.921777631388	272.817707082236	286.660132900886	2724.94304308547	1808.68288229695	361.594840254762	124.602963694064	78.2170495998958	205.896631446704	204.230252927849	276.385710592373	320.912848352549	389.592138701134	241.496294712149	6738.0679542736	575.236208340625	597.094449345466	250.464859751085	261.078544816054	143.907900475966	3839.77211446772	148.884730184723	686.833435694754	208.751383200538	375.137761717048	188.437701350228	174.334968420201	204.614385176176	243.231119492819	184.060578461671	106.106403235452
S397457_004_PanCK-	403.558894884134	332.252952249356	1357.00830207141	84.8912883133577	454.21110939571	337.846396307439	4152.51810836329	2002.34781534954	143.611901881347	671.658354688865	871.561987884746	559.650393892145	332.931783637006	168.313222787137	185.682279894716	445.728077685502	141.661875583594	538.767998543829	189.850326585581	274.810008756317	263.651617145544	2681.84380204997	1971.06103137563	355.850702221486	138.523383360961	63.0073880950379	210.491187732553	394.027771978789	251.683087343309	343.238774499501	358.57978612415	235.254592925635	6727.5035941789	577.19322135394	703.693758826792	281.883953945418	299.459923160891	165.519720816176	3918.16415554202	170.553461692026	665.844565469214	213.345122919583	394.207482801305	207.554040565435	174.534491777804	180.31736904718	247.380522876696	165.404713190934	135.4264361755
S397457_005_PanCK-	277.637735140835	299.170243945615	1316.82190020737	74.5204011355849	315.879772302768	2808.48487275847	5727.44177537188	2511.83039735834	137.045127966702	707.742106864038	758.077973305024	598.214164533262	350.949165223288	173.381222137905	182.128731821841	526.835309575915	168.659796218556	535.725224574221	352.758262952507	205.198949493078	447.967917720765	2827.13864186705	2051.28539381502	331.792536445966	124.574471854911	90.545886588984	198.080799301927	398.478599365265	283.11036824815	337.742207895389	292.392465950025	254.927231080842	7782.87292180152	582.72578188173	710.888479012561	224.573130654043	411.302424524873	160.878402773773	4527.15341277705	200.126847708754	713.768476214736	229.19809180691	496.226432141895	257.123285470724	192.164014715738	261.421449713376	280.312208079405	209.330309689054	128.960275268213
S397457_006_PanCK-	270.50931583294	247.354481373503	916.65290066226	74.6637178727513	284.036913292637	2611.66105268179	4401.26283172674	1797.22439339754	146.323398338136	461.406312451341	860.925758960259	472.849703058691	229.886291802756	149.725227411575	181.979418686081	286.749788166438	141.337154702841	312.578085482437	215.596559438536	179.748487687796	262.053686342327	2045.14110653104	1164.00053374763	312.627096437063	138.196658523251	63.1362994338275	191.696119148074	195.461523502669	213.559513545882	250.399450542567	243.172163017216	218.414861533477	5382.11846955137	308.761703303813	374.891438051785	174.260793492372	227.238417701512	145.846301960782	3031.27125770954	192.154010184441	551.905731424186	200.46300975157	339.651285977126	209.202094338403	156.176932164401	180.686293298028	222.7859656418	199.797224536033	132.729690055315
S397457_007_PanCK-	473.597961438311	390.278311186256	1965.17469918546	126.151360932109	353.665664054684	1431.16533978144	2754.81432253555	3827.57314875379	129.863944179908	806.463796034722	1302.30525274227	606.294733415729	365.394217927448	155.909486528436	183.312211424556	426.153507064416	143.70384503033	854.341365717925	216.550197139331	280.320346497533	256.517578186678	4421.56043025323	2059.81193477523	614.436897087528	139.343900097529	71.4515381587274	173.265787344308	246.940611402012	226.542216403843	337.6866720581	573.340384469739	252.904036862629	11417.5251565074	792.304362732423	722.586686480574	251.391559762871	247.678163070376	176.789480003351	5323.58591418902	158.196749300775	822.411350783509	180.492020156818	511.994283423966	209.369917539061	169.814004643773	191.009516102275	298.653128395704	188.204055186201	111.84931205441
S397457_008_PanCK-	523.59677451526	466.284219443047	2363.47457293838	145.62504274861	510.213728486126	1701.54788780097	3363.33893533747	5274.88883533248	186.910761960299	1212.1108567789	1283.00576820149	791.847384033569	506.255238722626	236.991371511004	262.541202702822	688.98404487078	197.594862074467	966.93519670229	323.853073161358	308.462390860185	448.376902017718	6441.71537164436	2680.51399921645	706.924397945509	152.580237401333	101.788354672034	240.044308852984	321.050187978786	319.834702829104	444.735379571535	928.92479421897	318.019968483633	15713.2315284355	800.921022780438	944.038405617736	318.671347953482	419.414466314969	220.323084539603	6304.82149838608	202.126719402966	1079.52476687408	258.261411437009	556.483841515561	283.752647433915	287.901441687949	250.843800906042	389.404131997504	278.41512971442	152.984974924892
S397457_009_PanCK-	55.1879219704855	151.144968077924	855.355806310936	17.6718589956407	74.4125643244442	289.744035581266	1359.19444158121	1502.60105832447	53.6889770044633	439.083035244224	339.23930852995	302.913853046014	186.515017387213	58.3494229860486	60.374323089201	513.035728539928	55.7733434773139	234.820225893503	104.46349352265	102.052753994778	186.317611165785	1783.79299074384	1266.46833102	94.1275369185279	39.8772832596126	26.2399150303184	98.1638099748494	77.3346432458534	116.212927606796	268.378470505342	131.367765428924	120.517376582087	5994.64663282065	322.253145696329	538.08340199717	150.345928023729	209.721085018498	118.38043769027	2070.84918728373	662.821794126646	273.936232380563	92.7085383021961	211.907381651151	118.831044540687	76.1226291559983	92.8588715134961	122.359331325727	224.80061516677	75.3966322820463
S397457_010_PanCK-	98.8712201716806	253.274399545103	1386.49345171311	29.873348297957	159.201229700186	679.028475328026	3203.43369650948	2092.86336985084	87.0647367135787	732.33991135153	528.263429413016	528.756531649922	288.106562667024	120.555882403187	113.483966154578	963.293712919236	144.041797960266	387.904447289093	230.590676463277	140.263531714705	475.583952745909	2552.7651435749	2266.33695867458	194.58743952013	73.8066046203703	53.4416035183043	245.762934847885	165.096359374443	226.323768659022	398.108546564571	235.350250479283	195.526875894863	7561.0484747641	510.743432722808	927.558947120168	179.03792941941	690.124802805855	160.800795269088	3199.9578013393	324.646959895537	555.647659457217	137.170461235288	318.318818578014	165.333055789542	113.053339751998	152.941577732883	194.014603150409	167.73970919527	80.0292821152
S397457_011_PanCK-	351.929086634499	206.738643078415	1018.15582866431	58.7170871692586	273.306131589734	554.922871118742	3929.62256621633	1607.84501998924	97.1793800218416	505.508553861335	733.598141685679	427.816004287291	240.135432956759	134.275467605152	121.609188971102	354.902454701707	123.817409818612	486.719345439367	164.118364815294	164.232197898858	257.92544197606	2150.39788439675	1285.21320320446	217.04423497197	94.0555899968527	49.4989132103707	155.260852322951	127.848452702082	195.64062455253	233.629646062985	250.737396232358	177.406474226345	5450.58393041327	451.300005637333	472.56955457405	191.450111897821	246.748593470213	136.613409027764	2914.35637709476	104.041903271905	510.496638753732	131.428851891857	250.849979345101	164.014622395436	186.604286199686	134.575299296006	191.604877942927	142.486207798949	81.8349900906335
S397457_012_PanCK-	27.0710366371999	40.3514975787543	214.338979895137	5.08080918990944	35.3889729201147	154.131344964389	689.076902226021	242.4310403739	18.1924707410671	117.323293204484	102.424281806698	79.3265612751122	52.0168541151595	20.5039431503447	20.3668718559772	124.553308002099	20.9986186686197	66.4840379648265	36.6301232005755	27.1640113863213	46.1862227885324	320.217266970585	308.842669956811	31.8086108625247	12.9718928434509	6.88364600520611	27.2326489387384	30.0746928489514	24.2330251376969	56.8486495460109	40.9810246505862	35.2983832027694	1107.28818905659	75.6238904110586	104.188096416073	25.941643021901	58.8895540506725	37.4061043516705	528.318381160952	113.480428809541	80.6280935998027	28.3853013106299	49.6140173855786	30.6787145632686	21.5385055963017	26.996196067386	38.3287334058487	35.1825429817293	13.161139290081
S397445_001_PanCK-	274.18508256056	373.940275169687	1383.90044808011	54.9298964376661	335.609559511702	430.228248763934	1029.74505726321	1476.40822860085	125.49848786718	1236.42081136677	461.764994165834	670.995762955131	372.793743322375	181.266842917278	215.504732406875	473.330031122192	190.53719925178	753.105628519975	312.081355955839	254.852784268846	290.49083696185	4240.81702819055	1719.22293342138	329.264591271761	199.418726471061	111.388709317421	262.498248621725	248.00895351779	357.285440585907	372.622918542011	462.462940712618	310.466985967849	8171.67457896529	622.811441847471	735.505927801149	281.453855952556	406.532072181218	184.870932997554	3900.51078692637	246.750707503937	647.192142874231	265.056127762096	540.299461173916	288.159322862466	249.019964445908	266.05009169769	283.087492798623	258.416635951185	211.403911503941
S397445_002_PanCK-	215.571987022047	356.021418028741	1478.87138112267	65.4175333250081	525.180397107713	383.593055317419	1539.4305006433	2278.29198495518	180.339708184387	1549.5084375208	586.21432492567	710.509319658116	406.870928966668	292.810762775257	310.063171253564	854.552694069904	296.11067374183	734.804991590392	407.585893379143	357.34152525825	517.647644243172	5816.8161481522	2040.16692527158	379.928574641917	254.850184613686	123.457875047063	398.514096169083	321.385515077151	479.938595183597	491.871483280083	705.568693541247	380.234424817602	10910.447832743	526.980690896134	1145.16093488972	393.364860076787	661.566190439675	312.238124972621	3770.62079762959	462.804814530019	752.1531344506	330.51344863362	714.794335989939	386.481458616483	336.106733547448	356.489852582523	336.938992751075	370.052699133896	293.125581741183
S397445_003_PanCK-	179.704045186461	392.682175768432	2599.39644694309	81.0381034412032	468.182622034205	327.369680637034	1458.69318416308	5688.93400904789	129.134508605555	1739.33489588072	638.732039778907	960.401424922655	601.620523127872	391.169770816268	330.296672687455	2080.34440437968	335.581603241908	961.833557212209	493.723955319599	428.712971158679	1013.21386060413	11398.8757511708	5519.22815996457	481.007584153085	233.205875427138	138.077081921466	3548.93136740308	3270.56569973399	545.806837844722	873.911087777842	1541.88484257708	511.358378914792	24870.7482846497	724.581912477182	2219.31438001713	408.952398345979	1112.95107388176	526.782819812389	7676.99014559007	340.412684460229	1138.1229215187	425.633910778038	1234.8579334723	447.485463208697	359.549882549639	529.466527681495	472.278948109954	909.981361066924	289.010986443863
S397445_004_PanCK-	225.508931093059	236.740025105131	861.018096018074	39.5454974372251	239.74633039305	242.684751193228	592.82276621634	761.034539232604	91.6638860643085	666.748793387603	381.230097659945	501.587731311867	243.009656064673	129.121791722827	167.09781659052	300.446932465453	171.567914062815	533.81948457386	202.080546182096	223.327539807175	194.701354193162	2282.36406287555	1111.34419105335	219.928113547615	126.676640934158	76.3316274217431	182.439525690299	190.85435555228	222.430908548623	245.469164078276	255.977219565433	217.306337936381	4273.84345091527	402.492553056628	420.58249348155	217.888885339958	259.604217548836	134.158263332817	2431.50185587626	178.34297686222	475.723330110178	148.617612652379	369.716936784417	190.609589484567	192.542546241384	159.529263050496	207.326042472243	179.790049697537	143.223800827016
S397445_005_PanCK-	228.17991302434	442.341969631087	2099.49100212095	127.421570550492	397.030280861368	4358.57683776031	4418.78071810534	5039.55487680432	249.820764248347	2213.15426936599	1128.05447215073	1037.89393584331	573.84561644888	341.897265006947	405.463936171177	1297.01760159956	381.069898170002	914.584921917362	621.055300853771	471.640891500221	814.119105117399	13349.7064879273	4000.19790232349	705.256396096547	340.056077666763	153.644710249736	444.499315345054	930.52996967449	711.545568561238	598.116446911196	1101.29429031941	540.649634815884	24621.3885185095	740.955400802561	1166.42096065654	507.450876466795	828.168903552728	313.776262868583	6226.77006412894	334.592078360871	1013.29223583055	397.173545474252	990.093378497341	484.987734212805	348.800440888234	513.790721410163	439.101014557465	554.703391048564	382.716260661608
S397445_006_PanCK-	243.852487474853	472.008857343079	2771.23862392531	103.127146987683	333.274247649788	3835.88997457746	4260.53410981692	6783.47169784597	221.874047331247	2326.59643361576	1239.45476884945	1193.37954327954	601.453434134306	324.755939624405	407.686892064029	2022.83952075153	370.718145505352	1055.84830793801	701.796542121193	443.959070359822	1365.38500454338	18595.3341903132	5622.86231005129	652.379958439663	317.882635895044	184.179567726135	536.598892403547	613.077534778194	778.009943278588	747.059033682503	1539.54374706464	534.616659768998	37020.1684089956	821.737975334338	1967.69788516498	470.791600223129	1237.27127102961	360.061000292834	8449.51030688595	373.388399873839	1313.75610929124	409.030759711693	941.086533292749	526.526167003217	373.132336385873	589.892556277895	457.659406117328	552.166627594708	524.991166226353
S397445_007_PanCK-	303.668974785258	449.725414176211	2564.92327552994	147.583365422128	367.46126818711	3002.1058346112	4567.07613584842	7150.08488163785	200.983228663344	2029.95587291382	1024.86768405651	1054.25044707158	621.427995219342	333.777192874795	365.845786407017	1477.5415188682	383.244410645584	954.530162875915	605.693791305519	397.970610452172	1022.13128853877	18100.3162777399	5254.75984557922	643.429559265268	294.375803453447	169.430294360985	853.871856777987	809.436842215579	614.86164180045	676.333273198377	1407.64888235029	473.245410260917	36140.416746497	913.181128155846	1518.23192527013	480.204800718846	939.252102042689	375.390572852986	7238.60403944892	348.277577885259	1256.96631834701	369.197345747123	1028.23982300466	406.346465706961	322.802518880871	507.473369085011	419.777647588563	534.828111999723	369.82610092304
S397445_008_PanCK-	167.449624830013	281.642989098617	845.854852080121	60.7047389541894	361.043662329617	2667.68252790806	3336.16048009533	702.574421241004	102.884459951845	708.791065814226	842.506790406726	441.490346366447	266.667284830588	151.016981264831	177.616923559309	215.903361202783	168.64739331056	395.88473925449	213.070722322557	210.182124604589	214.149630207868	2144.93309871618	905.214297368654	500.54334244044	153.490865538578	84.1246943216033	170.015220046447	154.835482346308	259.300219895261	244.20094627559	223.310487696718	248.610331213893	3549.2408211927	393.784346450127	313.778378267652	223.951262465963	294.573727798979	136.402531878627	2687.23462225274	158.545369376557	508.178531777669	195.858671939909	448.263222470873	187.079748610116	191.539002798674	204.564326263395	209.265573541942	191.303383625495	157.39219892155
S397445_009_PanCK-	106.273061568253	235.671302255884	1537.11116067304	47.4877029498765	188.956330447712	353.966820182983	1198.85522340371	3564.17962861586	130.68750553249	1758.24490119535	281.292979047195	750.066303082679	416.285658682849	236.50387231898	229.804306709581	1403.1423714075	245.671409872769	528.014566956018	474.914187038617	332.980201291909	1033.36544288649	9840.89801982462	3905.65778378657	306.62402512991	169.865120224095	105.274032088715	637.453917712635	624.667672944207	561.304038697783	549.265662631689	814.921879243072	309.005679282043	19238.1918724795	516.286436331547	1505.11078210348	263.071076729652	964.684006207912	246.273698605301	3851.45480509453	271.531832504318	718.35024479377	290.220510027859	491.306113434601	324.875860925186	231.427526395149	468.823923086074	310.258666103791	400.639598455806	376.345000069813
S397445_010_PanCK-	152.664745558829	226.591998317158	1981.29882826333	50.9021975514891	192.028670348794	371.106749401434	1736.42692140864	3739.19465133786	129.796533690606	1790.55339473367	326.822785951408	827.735900556434	444.506537156034	276.244108207896	261.42936642184	1829.66774165734	263.75495251223	702.024094281088	614.411071578811	301.085776561831	1215.2434401498	9996.95334976328	4099.30896387891	383.34725482199	197.673698866967	100.771888019869	1333.10653718843	2559.44903912555	641.561419226594	672.014787372025	830.993477601509	419.162788439365	18776.2409992632	520.294630047772	1702.69027985187	276.710343887776	1192.72830551092	345.889370926786	5411.61304263872	252.390726504155	932.681268178463	320.770370580023	650.135568315467	321.172063171294	237.506051585283	648.952309810933	314.015211713994	654.301363406437	356.908039721494
S397445_011_PanCK-	34.0374713683203	116.401816122032	479.866033943565	17.1107001986936	69.9612860394153	187.049617863866	639.381637262073	440.654778655494	61.0624082669357	599.462796063634	86.3673391204308	310.56329447872	111.326930666571	79.3592626066997	81.705778503678	295.451253515257	56.6083793922255	196.564711270406	111.403890614027	80.3944703610105	156.570994504573	1098.65532888573	720.213117738938	108.135630305295	64.7765695756917	37.5312119507273	82.1859952154825	81.6849627385763	128.386432413317	181.76199841842	134.113626447091	110.878484154454	3132.62323739782	165.832917033085	343.16998672531	94.0906952391616	210.42538556849	132.784220278464	928.464252551444	519.932523861018	174.26509298488	86.2159058170506	170.449428852719	120.575586594937	83.5639255962758	83.1635473084922	85.6476858177634	96.0109175609611	73.7295514235079
S397445_012_PanCK-	53.5392558150101	80.3678296247979	748.775503229502	16.3038448317511	123.409977129608	190.395539770383	761.915921899635	1322.7437906804	54.1810034045267	522.25982144947	143.057533234116	273.538272764084	136.036743851087	91.6664135993494	86.9975722659019	455.793062510266	93.071233411447	267.775139231577	135.249847905889	79.2725780789741	169.688534874059	2963.49947350142	962.902503207746	136.053146700836	67.6455354142763	36.5037276776332	191.092204622316	162.108182950385	147.14404751518	211.197903682841	298.643584170419	139.860485849172	6185.22934633815	158.220920157483	570.271043440595	132.980199068065	270.826563837715	94.0660899790511	1763.24895597239	221.041861877041	286.513539493604	92.3595594502	274.915352599485	90.8176851831267	114.035779460327	112.259455773888	127.313368859104	118.046680491831	78.3160398711569
S397445_013_PanCK+	58.253314655712	179.317900527988	2907.98358712566	43.3192058205361	145.738846186529	81.7688120838108	1431.36677663268	3011.64912084087	137.367175365752	1875.04537055955	173.627576998201	1207.1530970034	582.678866190427	200.234313892324	255.245967150034	359.29471834472	169.56496439973	526.431188281153	276.865372301815	1146.18041390757	366.916450201402	6042.7871489729	3061.30068489817	264.388227451812	186.601106921808	118.021784627285	264.59243024898	358.07743432541	358.519866565099	860.532613675142	362.015608026136	254.830561147438	19039.4424674033	219.444449366094	2730.27329262827	294.571136647623	302.971704504046	195.466577101756	7141.68852977987	227.969270476596	669.838424745871	364.061200493643	1898.00883507808	298.627129688908	495.300533507923	218.535467135615	372.958206040297	229.151031032369	195.020972742415
S397445_013_PanCK-	166.023112140083	410.711294499803	1842.13679663761	63.2359187119191	328.97079167037	380.760923738382	883.140967817322	3349.72253222131	128.129129971056	1446.99739060379	379.299234014533	756.816490110806	438.277028655211	178.791037187103	228.108767861327	952.124776554766	201.386746403021	733.344388523397	393.120600167249	269.126643238361	485.040594879833	5893.51505453493	2592.03508934285	297.657331638843	169.083086586902	112.530820716674	441.129922836566	275.142852548947	401.211503588633	597.696722819789	647.005845780344	290.681903829035	15751.3285223695	830.452707751521	1295.19490303168	355.221547541798	548.888746323864	276.866969194994	4330.13986873052	408.155539620893	733.030379367626	327.931341400519	691.154253818981	309.042521638808	276.760491880532	268.316732283664	313.96480430908	247.889438259803	226.13189790587
S397445_014_PanCK-	60.5926662694832	84.2343848219223	285.609930786416	8.68561232343505	119.105536473244	171.585125950877	717.631092993612	301.640283827244	30.938119694903	236.569913759503	237.132107040237	138.266884039467	90.0800919064668	58.0957877252762	68.6708647473538	89.503641451833	54.3273993242391	143.04865890795	75.1155453976352	74.6186236275626	85.5876778036607	762.77687743929	366.877176651928	83.3644897120991	50.6759301399552	26.6622744293726	57.9087729822514	111.024622860502	83.9890015219849	140.953408899708	68.9649502900089	74.6115066879628	1842.49332834767	111.130411312553	169.262629346292	109.265202243311	85.5500692084488	58.1202378689166	702.020895537203	51.2559441463322	156.536341362013	80.5754798606087	148.118575934395	66.5015014078067	42.6991645250056	55.666007593527	63.2774334489419	55.868174574665	38.2107579718558
S397445_015_PanCK+	79.7208676329891	170.70767365452	2605.4299824227	31.9970857917325	164.079749347224	82.6205744086198	1573.29202152028	2418.04885824496	137.378777035337	1633.09775869171	186.797265703284	1127.49821202065	534.267263996462	191.999353940765	218.343979586234	323.300901882277	190.92083042633	451.506662672387	267.824972617486	1169.17036278603	296.04594129225	5155.1757500493	2578.07976844901	292.81020940155	178.396838104608	101.339786767915	215.561128607546	315.211109587447	324.477217326464	848.435116145316	320.535336861492	213.320632826258	14096.2955616464	219.318937976235	2427.93302674761	239.92144321436	251.437704138693	232.777376510423	7001.17926763201	214.954422399228	645.196423061476	315.511778424112	1653.61989703105	289.478250553957	407.295242678139	201.407074727998	322.110501544206	213.918177268297	177.049534384457
S397445_015_PanCK-	104.688021927559	177.481253260728	1039.51080258664	41.9814014961127	279.150002029698	124.783289785127	330.811935624539	1464.20515496694	76.7895785598609	729.140551912347	452.822674546273	433.683241378958	257.763918567384	124.680694530223	163.63257126782	596.301152610234	163.41734105265	491.712321848068	243.352758506785	149.760065475778	275.908926967829	2555.55304245973	1218.03914552717	203.218914553026	107.350982331836	75.4647371884099	222.332177181474	188.927717043245	245.368952027336	387.828990302984	333.925624562621	181.814689471415	6644.14550858828	308.245345573834	694.800684406426	233.394325198122	354.197913238184	145.149849695949	2267.35851299583	213.426920938685	431.59846035552	181.696425919774	400.135122965396	188.533500919907	167.338318233528	148.742362522539	182.052256318627	128.18736306798	130.215845399324
S397445_016_PanCK+	116.60666021822	283.140982159498	3864.7480511754	58.0341263570099	258.585835935669	166.032701677744	1178.16871337888	2721.88219133047	228.865635587265	3202.51294680561	276.326329195492	1891.46251945676	823.437348366956	354.28678221913	426.869309307126	431.048335943354	276.340994723789	758.571034517602	426.610716326484	1765.5156343827	590.752479563671	6488.97809672677	3961.84451873136	426.284256678317	293.05963786192	174.377372073409	371.870924789775	618.188711773471	631.635886214985	1178.6512368536	440.048642809052	383.482427435074	19713.9265899629	351.165452331888	4621.44644256787	463.928415471313	434.637891848435	345.371030605589	10865.0775507047	342.728534019677	1114.0164788353	527.999404715675	2296.88755997322	488.4577965163	655.026438949776	327.057778783093	523.702595401254	356.654687216988	288.083267463921
S397445_016_PanCK-	161.993289992287	313.963506680115	1487.09936374139	48.3399678869615	324.660824359617	164.796018028283	390.624019604026	2205.67470605439	117.910519820808	1353.3076790321	321.62623031188	622.975652630491	362.426865766858	181.582159771101	227.713383728254	779.688782900554	187.677902936623	568.172280433137	332.628146026346	216.673880131825	413.373699627621	4315.19465499055	1938.15392435321	252.155932128144	169.852504490357	109.320751627087	278.545531254364	252.749227357478	361.205683654224	447.664830037533	487.945099516663	246.512471414426	11477.1495568572	669.518468922891	937.37302431965	332.285341608774	444.911850853888	220.265337384073	3069.87438460639	319.761585383003	546.389595162756	271.573604658141	535.88438767431	267.058420330325	195.575881447571	202.815602110927	266.134088562777	212.316647530705	195.979442207532
S397445_017_PanCK+	52.0587574980371	74.1359022476012	1546.47902338526	15.7982886549183	65.5385898364273	43.6659660238096	286.267776392663	554.650722570923	42.2050853048426	653.130573595267	78.493242012616	508.040511535181	197.842434239834	85.3631695066834	112.349006732245	124.741681810521	62.2245399056843	229.967388125244	117.109638114147	870.749154537433	145.273413221561	1364.90181775218	1713.31466439848	168.26503869813	79.184756154625	60.620122673356	166.069796437348	273.306382841851	168.639855932481	434.931402703967	131.478862060802	95.0723459791117	4532.10935660799	79.1136863035596	968.135177155562	211.020383198699	119.215270629391	75.510779070498	3104.53711409734	90.5242810601053	559.730139293117	145.811253761232	274.644689497491	113.055130680654	203.079824539765	86.2935368403921	182.038849421483	114.460742356391	129.506222263633
S397445_017_PanCK-	200.625734537682	252.493358527361	1084.77145616563	66.1882434891207	317.0737960231	284.729580469852	1606.26246971931	1567.54149940095	90.2151597004949	855.395189596506	577.843390103598	447.982731261293	277.960202248867	198.985495976053	189.860370661525	551.720147806842	141.186567278046	474.149597429078	221.956445233567	214.158305371335	389.655237223818	3143.70160787777	1883.91581081094	273.186611447811	102.241114963681	66.8047005858371	686.42779800671	1097.32981639496	279.049937942824	421.978818928662	468.652553957883	210.871850816483	7868.30617270817	505.466381284049	795.058572273832	307.708354220457	330.471286707986	212.678107863066	2316.64912446279	163.162328393832	479.348183293995	202.883560426575	565.81852111368	202.444393896102	143.483200582121	181.012914157827	237.820858452712	251.746042943967	156.313873871129
S397445_018_PanCK+	59.8739153297493	88.331227910383	837.01119069523	24.9770694891822	75.3346343232066	76.3027523248718	1796.41718862084	986.128245090202	86.0670932460561	982.553038068863	93.4779354134265	429.485524838154	219.890561196002	117.602748586245	171.717958670074	194.309749589697	91.1630192445895	263.763475615047	144.631786551625	413.044377867492	201.075280880078	1967.49570422495	1698.47847569183	214.044520546109	95.8961643839979	79.6354337301448	245.464398127853	411.875031924672	294.986008659018	446.091377863756	149.022185930683	124.681057213446	7029.91654460835	147.511190900249	981.57802108734	155.075305477925	163.032312702923	163.502013861502	1742.09429952283	109.145030550324	293.575387778292	188.29399592522	297.56613658978	167.177800145214	291.719850292796	106.771261990203	164.824141906686	161.196492997325	99.7039258746498
S397445_018_PanCK-	183.463713025655	360.317500117218	2257.83689338322	82.0724203156178	267.461449096993	549.364211475741	2270.95867583657	4627.92621303534	213.40941504636	2258.69095504561	628.923334300465	1115.07573807877	631.410544082839	329.376564221559	387.730226669327	1832.95190991623	311.613998265616	727.278779978631	612.3075889642	349.553289487727	1402.68276857078	9102.60977393904	4884.27999977445	478.265205115599	273.504708821932	166.092580399285	733.150708694097	810.750385066283	745.533172601833	830.219128296634	948.221611834372	451.033243683503	26449.1680300996	764.317712071503	1949.62447341244	399.966990899247	1039.59790647884	343.514196504071	5164.4918051512	359.211141286701	1005.2978542243	520.878487487613	732.869023779036	498.254169136239	283.392859259007	430.364756433653	398.615696942304	548.667195406216	545.256787974348
S397445_019_PanCK-	71.7754267350315	110.283571524552	385.015602657037	32.4542063173297	122.770631684428	1130.47804901322	1278.530046493	761.37737083486	88.6944580669013	446.740092468236	436.89754766306	300.631518906239	118.828479381864	94.4590944317441	120.431098963766	290.402494566614	105.919450142071	191.760156091059	151.950464189586	97.0175004862029	247.233266942195	1602.16145428871	698.170587705213	149.609863129602	98.823580650238	61.0727141801673	111.010202520081	143.051316973951	204.628264978481	190.694179077971	161.298238697807	146.050185056042	4025.03843358882	151.033518746988	265.075578576991	128.418171200559	176.00962762702	98.0124015927228	978.614452206845	121.763977134615	241.8513882461	142.132700845873	195.477743308364	133.084968609858	101.190823203762	113.290829440688	97.0604104402363	119.973626028857	119.872178346549
S397445_020_PanCK+	25.490291241707	35.4571516519449	455.496314687262	10.5926150585744	30.5249020733715	53.8172756702425	1343.53001158569	355.752281615409	19.6263471276349	385.635657219239	45.3555394091133	147.077245446656	84.0880202567821	93.1370789067055	49.1712788654586	103.184743623228	37.6356767867039	82.2193994843793	51.8972628900788	183.733442238138	107.138111046207	791.785075939079	898.602047557939	95.8825891740103	33.3211258276338	12.8026307512749	1250.32119049275	3660.45700573256	99.5594820476852	259.990242410482	61.9480864680554	64.1665134334486	2115.04558212774	58.335832161838	652.063927764696	43.3401359631561	66.0642418826659	115.974730345237	1357.91440173431	28.4119613903126	150.212268395629	77.4485427586748	174.655645806731	61.01510676813	72.5706388015954	56.8365742273727	56.9914978538491	91.2519401494364	39.1142585715821
S397445_021_PanCK-	68.6427791600434	101.848029166758	417.158941259385	24.721529936972	110.545469753092	1550.41856307555	1269.81864467361	1020.97870681258	42.281416052126	383.690243155908	405.053642394192	178.228873586374	123.787497150781	90.291147959732	88.2755243077547	256.353876903511	46.5774474392329	170.585213430246	137.757599104159	96.5532963665943	169.809984408273	2187.84116541673	673.632396996584	144.144143449981	61.5294346907932	49.327473604308	84.8820668681344	112.201391813069	152.976775502126	130.164541361968	189.880341831348	77.3704201170017	4306.57410570708	169.310808401742	373.465336263682	151.193287268847	154.344026193441	52.4677830575348	1330.24216608766	63.5626038811837	249.133119972652	75.9256144490125	169.635879863391	112.027853510532	81.3889308159596	104.437633460793	82.6871416048964	96.6546874013783	75.2362477282811
S397445_022_PanCK-	97.0369445767806	127.395896715594	338.304938023711	28.9971605529048	152.355783522462	169.909239038896	590.741989243985	309.01572337342	44.772414207135	400.044553579751	248.038341071859	175.003420821259	113.176739028588	86.5527776231537	106.56292827365	153.762297738743	73.1602919247714	190.865860907996	107.502464522345	97.9689198440414	130.932738034376	837.216588573924	414.140700586894	118.114862827512	68.4121458736471	48.5266885114369	86.2875559753464	96.6603712836593	102.203596663929	122.170292045763	115.029079768593	107.162710073496	1445.63189870193	242.86744462534	309.713843415851	139.54048566206	122.806989482949	76.1950741864107	923.098871552102	75.1599048115465	201.17695679184	85.7586681859235	171.236009658234	116.729896999271	99.038490996373	110.971895018621	95.5185077651489	87.4303937815038	78.3940705166533
S397461_001_PanCK-	145.374482394781	229.400829298036	292.065579624771	78.8736933675908	228.139179234865	563.632894936098	432.142297884006	182.010226114759	256.134375288948	784.428448530385	341.274336895682	605.956273435028	242.014619773514	318.765038846233	337.392459202102	326.730454383098	283.698904071967	312.973565649987	378.369196978833	399.533187070558	454.194622206773	747.267998907501	309.952883833597	401.336909896525	431.7153103862	198.044259034325	355.446987357424	287.795980323926	479.421141193611	277.82909252021	268.413760264237	389.999336955525	734.651860674353	345.916835069379	295.66623131331	334.154891503446	427.04569385962	249.177568252006	538.639357332733	380.734676147638	386.345296883806	311.565104874532	429.37325763016	435.815244488643	285.78953263031	424.626339787876	270.713672435168	357.353251514263	281.885894828739
S397461_002_PanCK-	288.032413373395	247.725766568604	528.513598024988	112.311884564755	409.378933732092	3660.84271176611	380.390347291634	378.917112424025	247.080141985684	765.07470954463	817.887487816595	622.900765566926	267.681979497353	295.083184086797	366.02278560879	332.416610909086	300.581966206139	424.862496244878	324.541432518056	447.40778841781	438.824764871717	1121.76588004955	603.55173851198	575.171910217302	386.054251209409	200.258779213265	355.127017044052	300.500809240396	448.473090483466	312.061712073809	250.149231790482	351.714582788349	1668.25553860295	364.410873016404	407.152169203461	325.932126737426	381.973370792242	231.321903749531	1986.92841132408	360.82844417488	550.9188579796	303.472962490455	550.065315797809	460.603488707998	247.487338710613	394.856147288506	272.749861215509	339.105888728774	271.965400548378
S397461_003_PanCK-	270.064423645532	434.458486254144	577.535626050721	110.799338450257	357.980768084172	1769.79075200942	877.12342650718	530.755108312575	428.755829893189	1464.18424280858	599.351307360012	908.393441621072	382.471530734299	486.722241239719	650.635061945012	574.060650129406	497.508888625454	498.864277611583	652.159162806443	798.157927522438	766.515041499103	1713.93969330743	667.600223004912	682.299672870203	643.765232719095	342.458933454545	504.197176613675	472.055517305421	758.359789170003	454.025220972366	455.186362813215	609.510086270201	2290.6345087656	607.20756925354	477.170571517899	543.856975277697	682.217850922297	365.777513177468	1218.53170840625	615.272086111597	655.173475006285	526.179931590719	754.31391862747	732.383480167301	386.877163689459	682.710766037451	506.120340877454	603.213959240305	461.95011394382
S397461_004_PanCK-	145.843698644279	214.696382845785	368.040283830155	74.7808082870173	289.857657445972	1467.4025590289	251.956217244887	219.140402122513	202.909488234553	581.172441414083	378.735813645439	515.695983391724	206.710196431747	204.803989122256	268.945539907684	247.186823909449	238.555458395657	306.248277820918	272.867579698165	346.0278289973	399.658835441797	740.102023771125	357.172085803015	372.061724223167	323.07036813598	160.840771416129	287.454638229473	233.103508951666	381.306861103891	214.576649727826	237.638748257088	304.661679198546	962.215559396975	282.987881121616	302.677343192267	240.353283573579	289.62500911775	180.314370155363	1159.18026842097	271.945988992442	361.935911430726	240.686907279443	371.114350517953	354.866837092243	214.029136778964	256.288216423002	249.524619764424	292.27021252686	238.537495943978
S397461_006_PanCK-	163.475069822355	173.030587904239	593.238674187433	99.9094502811167	242.326284912593	2342.51034787788	421.898599783987	958.074483355366	176.601517884971	847.836142226976	677.167551599612	428.771160409192	237.0268944517	210.052332807031	257.226712910935	298.936653983135	180.224729196983	340.748886698477	239.536282134611	325.924163340165	331.99034892202	2053.48251591939	760.804134519532	358.045554282173	232.197164389878	135.767067348277	272.785362006717	197.772113250797	379.834725063005	259.332330732083	354.315994144652	270.887270832698	3786.00212511512	313.584395313063	424.782291902784	262.788963288119	272.462712236212	158.136305849586	1496.84704951301	254.718565580257	416.041463476916	227.263142805992	498.970055073301	311.966329868625	212.92583395569	230.748355218062	226.671098639521	227.901587982635	186.932801044882
S397461_007_PanCK-	251.144793746722	379.782137776372	636.236485027469	123.850587061356	401.184913975077	4109.190670847	1533.30407787298	450.271775961456	304.081731389274	1378.30872440567	760.805372240136	811.946731437936	353.235776906848	444.796665614561	515.850711709712	469.896457690627	420.52667753024	510.863405280558	470.28499300873	529.474092419171	692.532689100464	1473.44317434528	858.506663800142	674.899237320755	540.775276413607	277.12373080214	470.845209125951	416.40871525534	636.239632749203	459.124637259259	405.220149429059	558.204920455429	2088.41458993472	606.875103342971	516.61470856543	489.439679794023	597.074480753485	328.536770049627	1388.06800803734	522.466808055028	620.945017949114	464.646912282858	712.406439051164	667.11162208514	416.813653887461	519.907931419352	427.800543401393	485.698628680924	363.83652359266
S397461_008_PanCK-	189.025900903665	302.677219731224	719.283888150682	116.913125823217	412.587311751248	5197.6048306687	1938.20151322531	716.767733920249	263.71831126111	1199.4784424295	793.754574878818	727.031299288174	391.690817567118	350.614847154217	461.590189168517	395.361321620025	301.860548348978	422.59564582629	411.793859201469	460.284313285424	516.053150619846	1817.9683589447	774.973615889819	659.704011094936	389.746868236681	203.75379305734	386.458552590368	329.642479913617	478.161678186842	402.332468536788	449.206217639131	436.909831785793	3171.12321749773	511.452339197646	567.446579529887	389.220226579182	467.864144094224	284.611590019016	1854.28606971575	410.403054937607	557.022131263235	375.487719539192	733.816501755957	519.968124543673	316.188979865517	404.688122077174	363.259704223054	401.802269640987	312.044373474639
S397461_009_PanCK-	474.849559543218	831.633332769585	7436.11414005032	189.032848414565	820.538097467723	560.420722484808	985.62626711867	14065.5871883621	710.13549912377	7876.44199230207	1179.79861100678	3496.36029634332	1727.71647268553	1203.94256607675	1377.56306389911	5582.66930707061	1004.48000497855	2311.72197579615	1302.21833577029	1413.18401456203	1697.80028848538	16603.3841852756	13274.5000010547	1361.3983149761	1166.96160769409	591.721985317211	1418.41842847739	1326.80871367556	1825.59177618114	3284.4506235237	1782.04149532575	1284.85658424962	60905.5272778944	1977.71586496895	6039.46113452026	1879.22667267563	1937.66253702027	2469.65069904417	15210.5935447881	14519.1522872081	2220.65468326798	1213.54290594112	2744.89845790549	2006.34349528037	934.865164754741	1325.84864080743	1345.36920830242	1545.08768294893	1032.05259040852
S397461_010_PanCK-	81.443212751626	216.453808197237	848.919984192945	45.5377110124844	180.967380301701	1103.31461355285	1324.24795526546	944.864461707158	163.962313787159	1200.10896954268	429.721982076231	572.628097465306	282.79693756365	209.098556974273	265.277947241466	739.683921062692	225.528003324528	380.383750394852	238.280299885444	266.751369552049	416.447988637986	1673.54766147741	1793.41812210694	274.600154079077	216.94320749581	117.389901497967	250.614811974084	187.629384579065	367.081974804409	436.379118311019	284.41185059192	283.194310146034	5336.74446387763	524.489369339498	833.809003253846	270.713523736069	548.430638916505	289.319283532517	1757.7955974701	913.367404768857	388.268929673435	235.439046571686	379.700137298743	351.679559196872	181.21962149025	264.942607136602	233.039956530687	254.95690408721	188.763018279057
S397461_011_PanCK-	36.9412172733032	62.8863199079114	188.598495430034	20.2927391485392	69.564593851732	244.083195288722	227.774276700261	189.190323846972	61.187239514375	585.604326861581	69.6871295545367	163.385500277781	78.5399107861428	71.6508572387576	85.4484998015111	188.415054856002	69.3289403748283	103.738789658355	109.603979701255	99.5146610065477	130.494419824324	443.341677799672	411.575581971414	100.05143602361	87.9113801478345	46.7070234758262	91.3606140329038	75.6492516923488	120.298374295498	124.049506595939	111.869579384084	96.3389905820512	1169.98275510681	126.058145679529	249.622827128311	101.180863769089	140.849589120873	116.700021438883	337.502411337259	308.367984382533	109.520456679325	76.7433672740541	142.924495775143	114.142344582545	73.1498940631932	72.1040004527074	74.257198994692	93.6544142101143	60.8464194975358
S397461_012_PanCK-	98.3094920317975	226.807893973186	833.68280097736	45.7427926690498	190.357017562808	613.416945695306	1961.23464609069	1527.04157199774	149.468290128343	1147.14148447074	415.122001404421	554.470659399409	279.033818046204	200.571216749319	243.301107436013	678.368615342265	204.923330099642	336.028417981665	244.876948890552	240.233454660317	475.195258684564	2827.00006799376	1545.51244704944	273.123682239466	238.534298694034	120.578391006073	286.241649166875	205.526828400135	348.145876942995	360.456739226883	387.491269222483	283.623055748255	6731.2503166899	373.623728140739	858.419789260582	269.08025651645	473.278535204531	238.798002035733	1757.89904469825	419.288728581657	398.608215043388	237.398596740156	418.406040901929	273.190337903092	231.989751995522	268.036761086332	204.723403215922	331.792539792177	188.650620042376
S397469_001_PanCK-	268.910261095247	241.736694714404	747.143661748765	84.667170904934	345.536413491049	2125.77009304868	522.177845432077	1022.77318805035	139.998092963711	561.116149052025	903.030346566485	530.475791725357	220.035214864822	192.715738311151	251.807913374055	280.821582614875	173.968057167636	270.217344694257	204.101924286504	242.170302351763	227.841711978015	1828.59179373063	662.922352602293	416.223015191845	156.701745628285	101.801038571743	178.612118348135	161.691986994998	319.592988558566	209.621949436774	286.427258650668	219.710874397104	3464.08690336976	397.180267188444	705.707432518946	189.386172176211	186.115821169709	166.79372847516	2156.40964033	159.472848569551	456.164244808753	232.06985601796	339.259228632741	205.580570552983	176.407700447628	196.50193271774	206.310929390693	190.811700168159	136.612720283147
S397469_002_PanCK-	322.953498677931	210.802009013434	677.348502383567	69.9207864368616	274.63333876004	1892.57663994461	625.979589596775	709.1732117181	115.067192438157	474.91945054505	811.349176592712	469.655238170501	172.713386186721	175.360282716207	195.240922836572	234.202472671752	155.31626414022	265.038641823175	175.592097908516	182.699115287182	197.946615095573	1219.04938127502	666.873199150476	365.178358292579	153.994376460259	88.3167873883423	167.114502549328	134.779893173114	218.397550894779	207.809013137801	194.671522577492	171.849301505044	2604.49064720688	405.258351133459	465.269991013466	192.283202252103	176.006276709869	139.089713312587	2041.91843665914	158.481345804564	408.372668447229	178.918998526695	285.793040116744	177.532730317926	143.056114501888	152.856606735763	229.913919428352	165.238297793623	127.271870996956
S397469_003_PanCK-	248.06683426547	136.253927248375	521.320662498489	52.9100251937131	196.802389510442	1131.26054172563	238.237763755178	218.079977302524	72.5243159669095	262.046538686936	638.406601911959	307.634257484272	144.188149074475	127.486246680689	145.03393144451	116.261455629391	143.100671267166	228.576486230431	99.0719488157392	164.970598668254	100.223211154438	348.327600340239	335.784280841992	271.144780907505	111.284103079937	42.3350600458438	127.553821163816	93.9156143331756	125.212222748453	162.708361693002	134.320511643229	125.576171138147	726.605793344771	186.001432249934	260.126497510204	102.265924577858	123.395747596469	85.0105102019293	1492.76783943724	112.636762976542	321.139720735299	121.55427716819	185.931739141934	116.835583469556	120.246427656428	112.961566404209	138.834539477531	115.362535544134	103.404790492081
S397469_004_PanCK-	191.651925161123	127.750665136405	426.158189824642	38.8649012467925	166.322420438811	787.82145444245	266.312816106955	324.016918776724	56.459764840659	190.652308388103	369.976261411156	265.332082841918	125.169879526383	100.169786952358	121.631908917987	139.014328103939	112.82695127532	158.207615030047	102.690795386475	112.878753054149	107.852853039189	504.997971081619	332.215865690977	205.061152201263	93.111694373501	56.5401675059719	113.696428467464	91.3373584787274	116.101636141292	113.932038112919	136.755635139959	98.6613472852285	1112.33334457606	209.848461599484	254.766857519455	109.548731216941	111.719043235255	65.4177509303187	1138.06265980484	99.2843980810313	255.179009977238	104.361816461396	163.669550455515	102.913507881472	81.9261726628201	104.487769661735	116.112625817136	88.2016687146902	87.2083739520957
S397469_005_PanCK-	156.835415497351	278.241752878407	533.159129914788	56.9690326367367	193.581031209892	1317.1388759032	2316.84736617193	574.36136090502	126.863029896379	356.851954857885	707.127080424892	380.401304232811	193.074027389647	146.665647785248	232.501105491314	253.6172002913	165.590973240288	229.007713240532	196.27699739778	172.857218254305	219.340853278534	979.897702801524	517.382449176624	277.780314862086	156.926219611562	83.5408518472874	183.694968798309	156.814369354395	223.622233939466	166.611152855321	181.982306718596	208.252781295161	2301.66494513138	255.440530503495	337.948693881457	164.34109092854	186.130514481394	131.806246130046	1436.24645818976	200.835910750914	344.471229344011	197.44084450137	278.555485073369	190.644305965428	139.603692171132	180.909562186719	236.22031905871	202.330312740771	140.285272726504
S397469_006_PanCK-	141.231602787841	208.728527499513	603.48246466212	43.9678987832397	184.249989172825	1147.04996169894	2645.80136756877	779.792723827144	87.8291974308905	381.349144616278	619.842787786762	411.958412199215	156.07417753581	134.643035633374	129.257971099109	256.477497770036	124.307321654412	232.629145488072	131.725068036636	139.920454516528	152.481732448081	1312.55998868101	664.541231339638	205.360627321327	106.178289855079	57.7393929195663	119.452620091603	127.462826255507	158.791298059217	174.721995504465	238.543271565613	140.483763351947	2790.14096625139	313.028598995306	361.821505985432	108.44761468286	125.569236795766	110.056783991128	1774.82549879154	167.642584360882	308.424200850715	155.069948182561	218.695868143823	146.11293071013	106.862294414616	151.105841132513	169.021940331009	150.652446695778	104.311495265626
S397469_007_PanCK-	150.447380682397	251.904646128841	337.7982854794	61.5088773233551	180.259907488855	632.400895402782	803.804390608842	391.420884215956	130.397721995775	290.846443306997	462.653989583742	369.912198110075	149.686022704466	186.373422995748	238.446287918203	191.606252663003	190.21770671942	187.282671792967	207.922870298825	181.528526908632	219.351378950441	740.715129470365	246.047595464089	257.490097422623	163.040996987799	88.1836562109948	187.547796725042	149.832617885568	225.373764274273	148.680464961991	212.103643101617	177.856187232264	1338.19619322407	184.349011994392	301.689841299732	178.329027047026	199.099737746038	136.599327127225	913.678792429144	187.259088817631	293.976991169791	211.257159746317	291.430678076592	198.847983730551	142.85446073559	220.3729529857	207.215588311431	160.979224517123	149.641910305439
S397469_008_PanCK-	139.184697861102	198.734974977154	282.078326803981	51.515966308219	155.526881649963	912.411361888852	962.787899435783	261.934523015372	102.795449619539	279.258568366437	363.881500334107	276.385600746906	141.624214013484	135.370440488367	175.445152187113	147.675190162921	144.729378106973	155.294494098903	154.338605089537	134.764220794011	169.749347116811	575.902573944033	241.79631860863	269.291833075932	122.217189765502	75.0414801243547	149.805918848286	129.374893191978	185.417847158568	149.012560347428	186.102010119919	158.804753546313	987.466035600958	170.428305295847	233.45966545012	134.903254760796	136.999036939572	124.770543596182	885.53104365877	151.885724665169	242.073614809325	172.147779330257	231.510222004709	159.52322656408	124.357965290594	174.504730827613	146.592345918473	119.686521187722	108.980119775278
S397469_009_PanCK-	99.2531811935286	250.053458183115	2195.7161075904	35.7550853555163	147.692344247857	74.0059551994776	316.378431654188	2977.75220675098	96.2480377680055	1454.49065685407	255.176324073468	993.665202145246	466.135232409231	153.2008988614	193.960677312932	1618.00647792605	227.804738023354	528.286328164262	245.84916641424	217.10657459528	402.666935838589	4158.31831056652	3479.54566384849	257.651538993621	105.027306966462	67.1262818039436	371.14505723443	146.677098319908	245.84187716739	684.081287376524	366.409033891567	191.521531243178	14305.6580477454	522.844687445455	1503.36874621085	257.457090382437	775.187397097015	338.676704350855	5278.0827277152	2054.40249667539	642.794732159171	276.176467938482	460.326176526588	256.32625946747	158.463942163287	221.731874553795	340.096863937034	383.898205524611	151.975119022757
S397469_010_PanCK-	45.2371512812799	87.0373754228481	357.556464414326	15.7469304985559	72.2175164177528	78.365033237909	826.260480173239	319.364181031331	32.7969301686278	258.809739379293	145.841986422514	220.190682383657	82.3580235163551	64.0228150866263	88.2246192376077	182.653891299835	71.4284492200978	150.667228618952	82.1226064407309	79.712760050289	100.163649753092	713.250491491495	395.140711907684	80.6442794033575	35.0940998622265	30.1373197490943	55.3556229427471	52.1228843965345	71.3455391263924	103.788974380279	136.515952517801	73.0131793863559	1552.5217803451	104.324550736943	241.592889833417	54.1086084092456	119.189174049663	56.4020098484573	884.964325663314	87.4071577356731	163.502255248806	70.9959968070805	117.095262431795	66.0940469111543	59.9338069259128	60.5055140530924	85.8373442222903	81.9090417469156	44.8327717702707
S397469_011_PanCK-	92.2616120772623	293.142770140237	945.427027932528	74.4521932730869	207.997443348198	347.53507627466	1891.80074050559	1532.80750997831	111.855353067452	784.963901228846	465.768478570641	631.772224036065	251.896829241035	182.250929858738	206.619408449532	513.395817126973	174.201438837046	294.79490012157	192.259320132619	192.886625209423	238.244357765138	2858.091740285	1106.89725888157	398.691916877371	135.217696414881	68.2851275819517	187.82473358649	160.884424847878	230.793972469497	291.263227668522	520.216288390479	218.409467314959	6144.53390096085	346.527339428847	1161.21159846758	212.633098979705	271.935279222487	195.204550150237	2614.40677854285	180.733327531772	495.540127231212	227.573411423179	429.51562955703	275.566810585868	157.236037263848	196.824739447596	214.657531696399	180.073704394103	152.020943671578
S397469_012_PanCK-	104.482817366083	263.727837606844	1178.37957995168	73.4796059749797	233.428038501099	573.503602524778	2753.09424828169	1736.71185238839	84.6090908138459	726.191833577955	446.55696755309	566.404537000754	256.58906754765	147.087889426098	185.623969758436	664.14110787172	185.698628584464	360.760783165871	192.185969595335	221.583169357335	259.880290790905	3043.46382560616	1409.11826275707	294.539511566249	95.1361454763871	67.5997549089323	174.393721518884	124.389675716303	212.451034317603	349.95716865298	321.990443347495	186.16822925668	6960.55717300677	306.688845543158	1026.89540323362	198.663636157733	387.143044547614	175.617068357205	2934.35433915773	228.431656607422	455.203971920264	171.211496660693	295.50172899174	205.263378427938	139.21934375334	174.86124887541	246.761981194413	221.293650437503	122.330170587956
S397474_001_PanCK-	114.111393131256	170.039621161097	575.699206664088	39.0644613333594	397.255363148769	108.224553768838	396.472213278103	384.260413426771	106.571561191339	448.602808612878	313.49016130526	347.082377856987	145.755305630905	106.974905995338	113.716591735325	193.747997074187	104.045946641019	208.456324355701	126.374885723691	181.373236149294	170.872231883407	954.702955842436	499.597378800802	188.740099368527	85.8838491367	53.9059138582533	132.608446886219	117.883582959614	162.793664972705	180.736903299871	182.895867698348	172.269221483674	1463.89015864104	336.911536420392	288.417169401627	112.84993076164	150.926661558824	96.7081711098661	1344.12494731018	118.758171529845	315.125781071622	120.655261365322	374.51004886881	133.321941637063	129.098019649032	108.456739266325	149.23679575664	133.551482772737	88.2942201855438
S397474_002_PanCK-	128.035911529363	168.073820609302	541.300109904793	47.6645624077877	411.789474413257	227.03394413383	298.851962231961	285.457474482368	110.785080732667	463.636788325529	398.150145888329	324.397710819547	140.631107546486	101.238689118996	134.920544420242	163.447835112728	131.444671668335	237.934980824077	130.66125374674	213.30251721217	159.631873309852	778.278127767608	420.855439011201	249.354447276749	104.613396302111	69.6127867133823	145.218774376541	118.213256729159	164.127491635777	160.006004067909	183.970914765594	140.170905698197	1122.63976351873	260.562027854214	373.95184778382	143.143350879291	147.869462288144	96.775072288229	1331.3132462752	127.83419479935	274.027606031079	131.607156378424	480.499129847048	175.954637928904	151.286991682039	128.611022125032	154.553349535585	143.778886511415	101.679950186088
S397474_003_PanCK-	187.005062641531	183.15770965446	601.188346329142	43.2298493436445	569.870179034131	383.467815255975	1038.92846394964	626.117212179186	150.967893164466	513.431818617533	474.630990076265	381.501393191997	180.530231822004	193.841033366719	157.245232819397	218.919799091433	143.594409936529	285.512901520484	203.55953212495	222.338428893039	246.488764690991	1458.55911965983	594.833599069467	241.00667494664	143.073258847629	67.4871554027698	183.649915758279	150.244340379329	199.243387531916	233.343392931615	249.379020378248	193.833094828863	1942.16245758177	263.479636174706	450.816750214691	182.21510058121	179.867430667587	110.018654742741	1702.46637261251	171.056147679477	320.14299904235	187.845102217325	586.548128152342	192.723970901548	148.665679580661	135.196437627999	198.365466358982	187.433165351161	109.297354637237
S397474_004_PanCK-	383.666404347457	276.499850741959	779.907098703781	61.2017486287557	306.099323767916	629.810711955822	1545.1495868916	762.045419669061	122.530167085224	339.706441993171	902.921956904437	431.534891251811	182.987677849946	150.381219039811	190.92416707311	144.028381453218	130.414936842308	372.252648445168	173.40072407314	259.572610398204	190.465316159721	1419.49566710359	725.332582466086	340.433851344116	141.133670174229	63.4516836108091	169.308640267712	167.21467145124	187.753844389338	187.902079237053	245.037354927165	185.894114338661	2324.90804356409	360.448980605222	294.290207470382	156.905397278045	177.634395361442	112.454144646114	2174.61493240183	132.040293185056	458.352884848842	182.662197417732	379.545823925677	153.286295164488	119.058858603141	146.858761389509	203.495335262113	148.058212342104	106.341610667787
S397474_005_PanCK-	172.790539657188	384.889768292505	845.248323070477	83.0792945215342	544.910367192554	7352.77006944657	4518.05860743933	530.553059945982	182.97120880101	571.572880650479	1566.35931520081	510.276543880423	299.585473267784	272.408511693174	286.446032314972	289.52296094551	216.508024855972	320.931567590549	240.928083461638	263.972245501828	271.025832252031	1205.54339984935	714.068733523631	662.400825743561	216.039019161057	129.233876866997	255.515678942575	221.778159635201	287.180044440737	260.827492601139	263.805624566596	335.667634483406	1716.32229552296	426.636131525161	445.021540467587	254.884316702225	287.029500262554	184.210132303794	2828.94418231639	239.679745610924	585.588135577877	245.279735161606	818.662300851825	240.826275809144	168.520424555468	270.425986293618	271.183684585597	264.127047958574	195.161865697454
S397474_006_PanCK-	291.177173134033	376.720500015166	1062.07848338287	92.0276619638979	367.221663997652	3562.31550180668	2185.52386368756	1419.4528764865	169.094002129231	560.878071378553	1123.58070850994	569.893229347573	275.378308531133	208.903357070432	257.259908918266	318.908068834606	231.208935127239	442.477054043326	265.591043890776	207.505449462779	339.276168341219	2773.84580140504	1055.95934288742	379.535776506242	210.39666284244	98.250935722571	223.264791599273	212.49794119432	287.893265780735	240.10046866812	306.477162663433	293.18568655766	4891.55695083952	449.231462028233	445.680309737862	210.695646272907	306.069382634185	179.548352504614	3078.40987980075	260.837539584768	586.465989713507	241.393676413619	443.596888867936	219.18735920698	361.641630490653	275.092810154995	300.041205528584	223.703447871731	162.736533326556
S397474_007_PanCK-	279.292871060998	265.689817764379	704.896111023193	66.3972650786136	249.734776710725	3532.71389252396	1655.18259085159	1042.08521149868	101.890150936856	394.018399944613	867.621337015758	376.372602092923	172.208160080438	149.286749433949	139.7336296092	188.882055158383	117.083783397889	298.544698400031	154.654165965605	156.941173163226	146.999213018943	1818.9775113719	704.786668324161	315.376699728042	113.013259043924	70.9662200374907	153.538076746495	116.751095173377	173.69590251937	165.509541149489	250.231175431155	188.441038978577	3170.85784585546	264.154842586957	274.056721958409	144.526073036369	142.076896125288	100.339236694009	2324.32050788587	146.651250701491	391.964411509108	132.997749574233	334.31484855414	163.853031978305	125.299767672184	143.977657266181	178.201008909638	116.244780411495	96.1137396034094
S397474_008_PanCK-	137.825453547828	345.620609869678	752.735724364475	52.5329184931381	441.335952908923	2685.03053417978	3886.80028663937	430.383815351265	156.75055339074	424.044828893222	1319.95770079661	384.946127234432	194.996820200657	175.307761648178	209.570420631571	189.119872910564	193.87235627601	269.732599652931	181.38447159419	203.965872884881	260.248250189695	880.422772072107	489.952022826593	425.404892992095	146.445841257264	89.422878398366	180.855472401157	162.513541593246	197.262413313441	249.393854913397	202.588775630331	241.469495942467	1392.035609548	437.752453494062	530.790270062942	174.833658375239	200.71062817684	135.1831869811	2380.82670901256	158.825553683454	524.078824020212	182.123000238199	1019.6463502889	176.370630744091	164.397850554406	173.656202644077	226.728825387689	195.875698539971	144.391857227294
S397474_009_PanCK-	217.747198512931	445.381111927895	6771.92328564125	66.5560265229758	385.799595182237	166.119430896094	773.920948377505	10399.4343333197	214.775148129317	2746.30079486323	792.046388803051	1992.6342165507	1091.7453105319	314.599957738553	353.257274408448	3795.72196564336	306.65352353779	1664.60634830799	444.976173105149	458.839595392343	664.10819761281	11229.0949841013	8827.51492046925	486.122803266849	216.602215658461	120.786319667535	813.881799053555	422.072818561505	511.253543035666	1774.26488962592	1263.40319714979	498.64617735848	41768.0970447807	1502.58257377105	4707.65924098517	755.823270516615	1142.29992424325	1005.15478401749	15046.2574636391	6187.78310841853	1697.72309854939	425.575877713561	1892.96283583361	562.852367083268	290.233648765445	351.866540182817	846.10955862381	436.235599110867	331.286612366905
S397474_010_PanCK-	35.1092111616928	88.172202060122	923.028483018913	11.923764016441	113.365549352872	71.2977548161247	1041.53472933846	1400.67586856718	39.1366466562111	377.354921669598	223.943459321031	301.33088507357	178.499888925268	56.1389991485826	57.7552641051742	455.000094151115	45.0364978295602	194.617941054591	56.8963397605743	59.694926698354	91.7826403545067	1678.95194047373	1148.37829891942	91.8239321983402	41.4359612984348	12.5647700832254	67.1057405855031	42.3826013217704	101.534199165134	217.712124492463	98.6625355055514	95.6174561122066	6001.65739175059	120.943499810036	504.696001084921	87.8494439203283	140.565859436912	146.437569083043	1992.08001116067	876.015491582774	214.133887877991	63.5011712354552	246.212266711848	95.8662870263084	67.5319831292923	56.9341690173139	118.060404566677	79.0620172253129	71.0095315825134
S397474_011_PanCK-	50.1008992482878	101.656224027482	935.634362763021	18.0161257802168	97.6004924656029	88.3165916979987	1227.98514593005	1270.90983777204	65.7035952929325	446.213515543114	200.174341341452	340.977563675332	156.848627527045	77.7542502019466	61.1857361333584	516.183395744315	61.7736838430758	225.29708361805	85.4814268465096	94.6314718922287	88.3432277404637	1584.51240001083	1245.59629753193	104.889885535718	35.7756392814729	25.3128657367778	65.4494095690607	70.746397841154	98.2244220420938	258.9927597048	100.356636869948	99.4219423655318	5397.34467171264	155.937036123674	564.557308950285	98.8455759123801	192.605837753937	142.981143892229	1805.37090398017	811.118228830886	269.064134983445	71.6019698137035	256.560454984117	124.155839388125	75.6893925392924	68.4169669461488	127.053078428275	67.7387427740712	54.4463530639874
S397474_012_PanCK-	47.6291032200026	79.8965725669228	572.259009467867	12.6170931014577	102.212219702363	609.821833410496	997.942481644915	844.799886360163	40.5435287140963	327.253376717831	270.957970745772	243.678347193388	111.287189877255	49.9379423868398	60.3030251255039	394.546773586049	54.2848417257493	135.240473570655	71.5862706708114	67.8656114181812	152.402923360668	1212.6962629731	811.730101575763	70.2718802302905	25.0544749234693	12.2726507440134	55.1415313629523	49.676693822446	78.5533643497343	194.368346760819	111.485384701188	77.3265779212607	3199.1982402775	169.164558258766	374.1869507809	80.3299810477194	156.47914743557	83.3628091230604	1300.30455859607	467.024149263775	190.827415251924	61.0990837604445	292.317381010737	69.5592738975981	47.3811022639925	60.4886162025078	72.9346585756171	79.8867911351735	41.408134527661
S397481 RNA_001_PanCK-	236.579642953187	421.342814521062	1046.78035842299	101.353803810197	351.688245457943	239.177436321982	324.120185445137	455.772579107691	238.602572406784	1814.88320688604	642.737307733675	699.040036749705	314.415261007208	286.296971458151	347.1911400254	369.057295507265	286.811255787226	449.238200460964	363.059353957359	347.609183683469	359.681849174455	1261.90474504383	1351.17191292795	514.953845649568	250.011550207476	141.550304426881	359.323343758497	446.340374077715	742.176254089509	316.114868632832	338.916934484879	322.334356744997	2045.11767651098	431.663312054642	589.697081824711	313.01311939531	344.985850950721	220.402010475411	2958.90220238507	303.412026769062	571.843342524829	408.408871564796	501.270993101805	351.673360521333	292.609126783551	377.521312493352	367.938314438667	366.401974942213	224.737823644405
S397481 RNA_002_PanCK-	535.259995164199	469.446156731032	1581.58109107361	89.2693634628173	1587.52879264692	431.76820198659	450.323379808305	1240.49919699519	163.24571489308	1161.25132573325	1152.21830237164	738.53117724103	335.281275451015	249.351799838721	281.331814223717	421.541615395078	254.826410106099	716.011866239756	304.193640969823	704.123174322567	309.793805253819	2392.2092806161	1769.22552060974	689.34044599195	201.378389511946	107.542552752986	334.911205175852	354.040269456537	384.745649735668	359.106998374049	504.795824383923	336.121643241562	4309.71733083201	614.350272807261	1307.15241248279	274.61874777689	255.463372643138	226.900466444047	4894.13565044862	242.554651812242	722.016219795963	352.306887232203	900.010258149068	270.74389879255	259.641761133049	299.164166674487	381.88896982898	326.682488216534	189.113345459163
S397481 RNA_003_PanCK-	266.757969739917	511.691174664433	1427.55192486334	82.123802650054	589.645978027692	838.381011035154	804.142451861417	1197.85922505836	245.070991587035	1069.33358341718	1031.41944219175	687.385322092332	323.900059267843	237.541343766291	370.96476411525	555.488753746255	275.36346601284	416.067143598473	349.373624463345	577.684602734424	420.359103311701	2718.37037042388	1890.35101765232	521.162734085565	238.662859070632	155.983519188932	469.816713993966	455.374015380587	379.770108355158	409.3609781805	514.120003760903	438.658833573809	5216.39625887301	728.626737243136	937.200660726034	280.954050607291	319.271988345893	284.17049937924	3750.5799582014	296.508461390673	553.754207986268	329.313755004322	1013.97517921027	382.490233833538	302.950865296079	432.226447557083	354.857555140093	400.722231840212	212.571720366803
S397481 RNA_004_PanCK-	583.876993715736	761.919463778461	2801.89419134045	168.077330247803	931.451130047801	2393.69377266156	1989.47851320181	2998.13638285192	237.992589171935	1989.3993755157	1768.81086879217	1095.65133794275	593.141682132607	316.044087555231	449.668801656521	1179.90516751082	319.880058489187	1037.99279548208	461.888602611073	803.204828155567	606.720162406027	6493.16685741364	5183.13378752784	1010.23880633191	300.743834238637	148.609909016553	605.28764065855	701.71107827063	560.798342236677	742.307272420023	834.131270172603	576.75109850508	13063.5832667908	1195.3965248645	1740.04149304262	473.273675978946	543.023278199193	444.069492061513	7985.64381387903	422.163208144591	1115.00879873855	484.88099383864	2168.44748985543	440.117117577458	516.160143317946	679.244713612569	645.128870215283	591.111312360048	258.374482943002
S397481 RNA_005_PanCK-	219.756434293896	304.598093501476	630.340296263857	95.1421960064895	456.62939749424	3500.35342734485	1172.97944671338	330.785658415922	183.437203777858	871.213192249195	736.113069299594	457.47236216097	231.666097512303	252.224232546877	321.257150911134	301.368885483035	232.306486280946	277.121096945765	282.325386789054	293.513390068025	303.100532878918	950.022293009612	876.342379649783	447.096617514506	227.788171661069	129.078764339095	342.833772013032	435.134932096667	526.212189677344	310.002300425619	315.650679927125	349.384555046942	1227.12870906495	314.441586469402	445.972784466807	216.73151191002	231.177176366469	206.315643451136	1637.31860368901	203.699509409919	417.147949118305	303.65645569979	517.308955675548	225.910673792884	257.859263931681	353.088477179588	321.861017683221	330.380187809493	184.170430054162
S397481 RNA_006_PanCK-	113.922027409096	364.867701565597	304.037097998661	66.0124034049518	231.418293676431	270.394881950592	220.844774332597	140.638503321704	234.565422177417	902.521611350117	345.838845675216	359.779804366801	183.449413802425	250.051683907181	388.939967319534	288.478726221003	268.709309261902	207.25253492448	322.449491947161	387.047142625968	322.169388360415	613.058295907708	234.532553348227	350.909243912674	240.504801298517	187.057551466912	348.290173323999	261.063987746194	1026.29598728068	230.963773527173	366.204423472166	383.261810146872	431.454118475909	228.175792451931	331.40404230173	275.983917401472	281.442645708162	243.598792657007	394.886299366867	267.209861502035	269.520465964331	342.530502688712	317.521085689242	341.839717122468	246.541719122683	343.750826042688	301.920153587627	321.693407321831	196.945006058614
S397481 RNA_007_PanCK-	145.481605374441	470.074671331475	673.411039999781	78.7916933864925	505.717230745895	2348.51219379237	2860.5945778222	539.028605269192	170.367119804541	620.599521665703	923.822069662349	453.479624321144	293.624473994248	211.737740874933	285.907965964925	244.147579796044	215.648706971615	304.685805487465	257.665639838008	210.071704560303	254.119982482283	994.276508053975	624.452368012733	524.14880580614	212.943032263248	113.914807365091	256.110379047042	179.844029678399	292.396010199524	264.848521211012	229.964565104988	309.115807768317	1634.28642398935	438.039421812823	522.968314543452	215.566429417442	234.014146288656	183.396564716292	2335.35380166367	198.446555164779	443.026450242441	283.689391084551	948.067464258183	253.744993510811	382.476662111267	237.980155729885	288.183386622341	274.994820255484	163.384916621549
S397481 RNA_008_PanCK-	152.624061747799	520.955894735348	601.933478665179	74.5804435391224	458.269752023192	2411.58431011839	3344.80814338304	371.88699528205	236.280375881221	489.921198055204	1234.43155729201	469.677944251377	268.562408958694	253.957869551792	407.181589489972	367.038645680886	289.888594822955	250.677655265379	357.186630549994	386.202066625614	363.164921777757	859.497651795597	444.394067451763	541.23726274413	257.043810150104	143.768401529133	378.314613935727	274.123178521607	347.372157051171	357.925738695013	390.510497673169	449.740328766969	1347.10706393696	387.068839264473	817.194591701173	263.43104849783	307.648032892996	267.463972299146	2004.0707348066	329.16724737586	418.625852066892	315.913872240997	1101.83782237572	347.319819040385	283.98086964634	384.072676601344	324.066316807432	356.046477872996	205.290713351248
S397481 RNA_009_PanCK-	84.2350772046735	327.563633083769	1130.26590218468	37.6767998973518	201.854058945509	403.943674273686	845.736530674731	957.451850983125	99.5309091555279	860.969328198218	393.938242693801	477.397326025846	244.857587419539	145.42283523135	211.243520666629	928.690218341653	184.575083986675	278.123640983544	199.504118522185	246.699616124066	245.885050684606	2248.47200236729	1406.61615640917	244.863805985229	115.992576377594	80.7644507397293	238.099550197852	163.923129387273	220.262439451597	398.886057545707	353.488678774391	235.837643553007	4592.61712969896	381.383179528273	957.351755483877	179.093123079797	421.99984205808	234.901078161757	2311.18327452013	768.501928556671	355.213123422834	247.203473139246	572.035909777976	234.807996310854	169.001961415702	212.841219149479	183.517741082616	208.249793865051	150.692249468301
S397481 RNA_010_PanCK-	160.320595209403	444.96681565688	2692.27596780088	79.665469527196	365.848344702641	536.188850382963	2066.73548363067	2272.36542726741	179.197175504644	1742.93661526862	660.607058115227	917.524275831249	492.372483566848	295.892265190004	387.168974631943	1437.95008080928	302.633220790038	560.536785065427	350.472093438667	401.153198656784	474.420683490441	4862.13554996506	2545.85082163774	421.098237522144	213.053936581353	137.026047856269	356.534042433752	265.805022217761	462.19331187906	785.499029240037	533.446446090058	412.580007141672	11846.4602651508	437.009692502537	1773.18580089554	371.982223003726	504.305264328289	572.817207828701	4967.82261158649	2467.87087480233	674.161293807091	403.523267133272	939.182972585449	458.396870125217	340.726568502223	390.430097886351	396.372730175126	351.054519054129	373.66640393398
S397481 RNA_011_PanCK-	123.492148854611	241.785704341653	1766.95788423412	35.13425192042	217.74591720482	122.975859309076	467.574319062731	2575.87999547231	121.981022068888	1203.57876406776	316.676599660728	655.88467455019	334.92306661875	161.700449595451	246.724997634218	1265.21480555492	203.300428991975	427.367803159329	227.681990895447	263.068664689028	311.218974922202	4603.1866349608	3102.50229915304	240.128907097317	96.0041883158294	69.3357138519794	246.281219796824	1675.56661544308	301.865509934864	655.37916019546	408.043947755005	313.628728132412	10243.1836792053	272.337336185785	1351.55416407984	200.40368283789	365.86908079101	573.150526980463	3550.92540003088	2735.5479492909	440.842648786314	264.710418252675	779.261686571824	299.385995851671	183.545114219711	258.974277102571	232.392509453466	182.562891222274	179.12525267725
S397481 RNA_012_PanCK-	117.845575423544	347.937352357342	1717.84152046007	44.4178616357583	193.004873602842	126.788800365089	251.309066483	1737.33540439939	120.429929661046	1219.95817731526	261.033623464092	698.736123370811	306.544219926433	169.99525589313	251.218773215406	1181.47996103138	227.960761521836	425.434202001556	241.195045462111	248.256599624395	395.3112315259	3286.8937067418	2755.86510149245	251.677231132111	112.425527110422	62.0338023850277	246.475783981967	185.251068766495	311.347767941221	608.378384149432	347.295435690217	254.201845431347	8079.54182477776	596.845737670225	1160.85420895232	209.26435158264	666.971304210311	246.62589754288	3799.8011076718	1175.22508316628	489.415133612026	276.03152353728	463.663844560098	238.995283955254	213.179236567159	247.865184440419	338.990360877838	245.285266095914	157.081355223384
S397497 RNA_001_PanCK-	195.626524046027	243.531256283552	632.775926360491	64.7128574759998	347.069440300809	348.881046737701	250.653996270526	651.410349073524	115.85622704953	550.0040497587	701.641246825429	331.32539555738	222.60814593448	190.641717070618	185.476146586992	216.15773220036	189.713740803444	290.070189526573	172.084332013307	373.476822349531	205.89138842524	1110.05047582279	741.386043246218	308.256758747277	133.644137987538	88.649257637214	178.977023386492	165.614100481324	214.745102701691	218.136183228229	400.652324509567	211.592256480661	2248.21490051441	321.366901693062	447.782459375562	210.593863819985	201.939208361081	162.655275326722	1741.50893659305	161.881299736781	560.707965507974	175.300729655958	529.430457289543	187.89799308611	149.908055677238	173.036697608992	181.378555239592	168.083634050923	173.940549081592
S397497 RNA_002_PanCK-	246.334121222729	239.504057329907	628.984335216017	72.505168558549	343.539502732368	1457.45915226329	463.977262973786	694.507832571909	209.688065528412	483.879966220323	640.762991074087	412.773407122699	251.367296371856	261.651410078446	350.262516095105	250.784394857513	268.028008263022	309.781272829572	321.162294699247	484.289995934855	331.047071212259	1315.60614493196	819.975540725927	366.628929838126	272.265354877954	160.642104729935	332.818783277631	273.010182148722	350.785831306185	300.434760732401	472.351001942552	260.654822881596	2536.81111824704	251.62833987911	433.651629679636	290.262869593812	300.707022549221	207.588885487639	1697.35319086465	296.315279142676	525.585883568306	289.932515226783	473.567966890331	262.214812380046	231.348527766433	255.095627870755	278.472721333123	309.451262978476	186.398293470605
S397497 RNA_003_PanCK-	203.549858746086	284.130701647544	746.562810491998	84.4915508259687	525.800285313777	972.692979638749	294.444977857192	503.207777644892	181.51951889729	456.57607841499	817.212801100738	299.486042370952	226.057691144493	216.981716359544	167.806409234177	224.143697092629	245.919692473114	285.91612504262	181.890749800903	464.477231108012	190.775180788838	823.289923205747	818.131429424591	373.20099994291	230.315698843229	100.365269550879	245.371353429955	239.633758840577	236.239779021061	300.037151763892	320.025319260301	203.461701505855	1684.39361236534	300.667884639586	655.884295531591	260.077112106509	202.937885369778	188.895790818227	1931.94068318827	198.815609234477	491.467298582248	177.300830159262	603.79287799475	249.843663989583	176.461865625287	257.889148125135	230.88652458727	250.084690628949	147.469708018504
S397497 RNA_004_PanCK-	118.584305091013	139.934352646957	462.718380549678	48.6638281332608	273.267417027933	1667.80067464881	232.849549744247	463.208245310818	166.235551773908	427.279786096344	432.708344393817	247.83368549358	166.759116571239	184.535226467799	151.349933864499	167.84700038905	187.715825625711	212.572125002337	144.94340812378	337.142809166147	161.890750631861	804.909251571529	515.937445774826	235.00528691062	151.616220451869	74.2674881998874	217.661009961004	145.195801621365	205.424618810851	246.222764432385	231.961864117173	151.060053694286	1595.08879216258	176.47062338522	274.844426043997	168.877225918387	171.057911420837	121.375501936492	1242.5187205067	151.584651249999	324.346388155494	166.46250190311	338.734671236093	180.400864880191	152.598725129218	166.997308128842	165.297499956112	205.650411179309	116.340612860158
S397497 RNA_005_PanCK-	71.7943828068357	167.578658405786	357.629550782056	45.7176647863267	225.451105829681	2151.89651147232	1901.19143482043	310.08621183753	144.989478669409	323.517151492759	537.061845284826	227.640780197382	137.295611092235	125.194172040644	138.756492825884	151.030741411362	165.014427575634	176.923484760749	121.699114462073	149.227700140725	135.401438958754	550.485961139007	371.728521011217	200.352099058118	145.254641681769	61.9397833712702	149.825856890265	144.858780663751	183.691746160592	165.761695422565	138.599756288162	155.430393074188	1079.23794206685	165.348302041944	264.421847371755	138.826851739955	148.098721773392	133.452654961356	925.520129094562	120.263953826978	261.180077109713	113.378888103054	463.173446523671	148.827148753141	118.784186628339	149.687953306364	169.790052789899	142.160672105089	123.998296863212
S397497 RNA_006_PanCK-	75.2598136053502	177.370926309094	317.635691418211	33.459946778249	194.407560438141	1090.93668708006	1155.16607753294	220.642518453921	113.151538139152	299.259132610327	396.30113609666	219.631582719958	123.892474548356	157.534812086663	156.481673163953	127.936014922667	161.335476878011	158.947812674822	102.831882631657	142.798223768916	130.209091229124	378.398212428498	298.524075250577	175.323431206838	143.960499720709	63.171855522079	192.792756294683	130.825429021768	153.74441550574	138.220423711814	127.573899842016	113.962824852179	838.94995479442	209.062008080948	300.184677958466	149.485095209812	111.664094091998	103.361936349444	843.634315558474	96.876314618778	260.180552688161	91.7567244258707	457.132348591164	179.343863638235	170.821685243919	162.569098600771	155.737417361286	150.45704345208	110.041231666492
S397497 RNA_007_PanCK-	268.497308233455	374.93424318103	1178.05903084279	93.0424013244468	578.491504091832	3008.80693820834	2370.48484242583	1974.8980832132	260.065747767224	1238.42442699298	1208.56532859724	588.807988877156	366.26048124285	311.2943847948	375.35949854411	532.717205327301	305.219831184175	473.468345684735	373.542998747611	304.663279095783	453.790867776988	3502.08750098275	1729.71173036202	568.209300977413	258.979205741733	169.272961324309	312.006133882201	268.449287841895	411.125861574533	427.319342180377	613.112547919878	353.822636844771	7789.12766007729	675.230306105587	716.368366987533	397.910791931282	413.59365805271	270.343339268465	2573.63170168492	317.736054465039	757.938351287325	328.441291963745	779.699588941969	344.160035414134	277.847786680487	312.563175547486	335.142437995767	314.192133758071	248.526319342404
S397497 RNA_008_PanCK-	117.26308191158	272.268720376276	416.571859802201	25.1525053329927	309.653323348656	536.557090805269	1074.98936827042	324.00822902767	264.556188429806	270.497286479888	413.346546124833	312.660804471956	159.226411337279	245.831469779099	288.299448197384	217.829667734464	438.120663593886	255.818782808708	161.721336894745	252.362216681238	224.265246937093	529.07595465331	447.374428161517	230.639673260528	248.172921648348	125.897188918648	358.944967225902	250.968954272869	289.461962869836	313.267643617466	188.228920961666	196.819782603256	1141.42277975361	350.539644625775	345.714685117912	243.963158988859	206.03482344998	203.249780251688	882.883293495208	215.740644549013	351.001417686083	193.430869511198	443.256149243533	228.224800366652	261.836112111539	287.606475110783	215.516891652873	274.606710893054	256.544327757947
S397497 RNA_009_PanCK-	66.1652121690118	234.233007281524	808.760572529498	51.856107309165	230.077642094082	350.716446671632	203.185121955095	807.561014053251	114.500975301088	1255.05155852507	410.627278729938	250.182424471683	141.21887488853	147.79606693432	127.320240730653	308.119014262987	146.271733976935	227.387777123442	120.784538589451	171.088248947002	178.291496729952	1041.51781795272	1024.95114208986	298.887197729232	114.558133704539	64.206493536897	170.93540702494	153.24950967628	178.37651599295	199.218577656227	485.870604401611	136.823974946873	2223.96045657118	359.770188470668	1022.30245247881	175.582589648698	128.10684748718	144.170967416294	1411.05587402158	91.2091813662407	282.258830970646	124.892425938556	983.077700730248	196.547872439472	104.240919946984	131.62164043032	143.500263363477	179.033120111187	89.8799860970253
S397497 RNA_010_PanCK-	73.6239480964664	96.7446971662272	507.619116795733	39.2921730881301	215.957435582234	69.2716236364487	221.084035533531	685.824817809292	69.6347039914835	574.277164253513	219.997010091986	175.850728627981	119.461890265429	80.4843468114808	94.265039587791	302.656978672281	83.8203742716928	113.703248932841	72.8002462886964	120.782717140156	178.414799322133	1108.16946572513	724.54148035815	145.195816894828	69.7493431969619	35.1310648437754	118.703098403742	78.3561893011563	118.053001097341	119.226198899951	238.769749109987	87.4727071927086	2560.6788176379	163.475100826668	476.584622476327	118.707186229983	125.089915761975	66.7446681762548	1126.78407351416	76.5310102377405	214.268667705583	90.8566881815244	437.46179081674	101.746514112179	64.9659797817174	100.539656951029	83.431005654387	116.517832829109	44.4498062040705
S397497 RNA_011_PanCK-	62.8122930626109	103.229367818348	377.660150334513	10.1047566110328	111.672600223086	32.6600323538616	59.4034335212821	331.615739429981	50.9218870939377	320.032177905509	92.3254958189199	140.39378194375	74.0253404249212	50.9730210672354	42.7561309786366	152.483860236197	54.1362263292651	101.746853210097	49.0338565437156	218.939438582972	95.6417142446461	501.977126338627	552.732655743705	74.8744101467901	30.0983795256648	23.6621671161176	72.2140323490627	58.8354719861051	72.6979508585806	91.275751243414	86.3436519138218	61.5717259680617	1346.40236670893	135.564328016015	307.863549046346	80.2557166344665	71.2396866474095	59.8919067416441	1083.12801399029	44.8595380878043	150.910780149596	57.8298298311596	275.804126170553	99.0373617579596	36.5410727739755	72.2319478073023	72.9708829000617	83.1734811399068	38.3215480833518
S397497 RNA_012_PanCK-	82.3754746506027	204.041346941247	963.449195245132	35.641035961473	152.472191464054	95.873610868864	177.898650566528	810.33416477359	74.1002938333486	484.581488005987	150.567630993031	324.886246276	166.986048473177	99.7542915994227	86.4134496945162	219.447569291716	109.763626337603	235.267864175737	92.6119242771853	261.562853739166	130.97774689173	1319.68632988559	954.213183162414	131.438289110541	71.9159425328833	49.6722297520193	122.014323872583	98.0785651091172	141.908138613635	182.375637771041	174.595560911615	118.962678922461	4378.39516643319	339.212342693904	661.191561395168	151.38948017813	139.921130224925	115.383679478906	2725.05323239818	100.861080603061	272.031862289438	85.5377917931265	478.897761949673	127.825787588318	88.0435692714361	119.039708359584	155.283941217962	115.663897455084	82.162405674543
S397489 RNA_001_PanCK-	153.50853545764	229.015172304945	507.28311649916	40.7741494030226	477.682554051238	146.268900091689	303.150292770573	649.342364684225	111.859589635186	472.184008188727	259.560710543307	423.993477727826	194.068410892601	227.544967844469	197.97550218212	272.584853077575	162.260329952637	287.731572215443	239.179133171182	234.331725640427	277.714673176868	1116.01336721905	963.221058966628	314.823087366923	176.913172393801	83.5085814887163	264.235054120145	228.187107014121	204.926549479126	203.659751550582	380.826658961152	218.150051581258	2880.21808277477	206.927952690081	902.516709294552	219.369276787382	214.39977014532	194.379441354035	1670.13830968238	160.443012696754	424.911167593596	186.641787368466	348.253406454339	227.060552872227	184.837704390447	182.486172658208	174.154889930556	186.440480883261	187.147385473831
S397489 RNA_002_PanCK-	195.647375244002	161.797378304948	945.678620164205	68.915810616996	289.000842085795	1486.53572601173	376.78626432014	1259.98901534056	84.1275645892951	473.156822889525	534.435381511778	371.528406800192	201.853109197578	166.310417226527	140.198758323085	221.010947627075	138.428592101872	367.193599864947	138.430340396101	302.407617929023	174.559667479605	2205.99980830091	615.024013154076	391.070813391196	129.889213959438	59.2216193505501	147.155404607352	154.547246473313	163.346147400209	189.424178528203	226.048207204745	117.813846146834	3859.31297513278	345.217970730858	376.696456338138	156.337931442421	154.10570738727	93.8677146064452	1927.53287278217	135.975391717687	417.288404764103	141.184422032093	272.244002906905	129.154741642566	160.955271491312	156.194743615641	171.402041512713	169.424142081992	153.560740303796
S397489 RNA_003_PanCK-	370.695795291623	338.322731562473	1309.0836021837	72.8210869758206	535.122223079808	717.094055750798	564.433592468117	902.817626887735	167.197974572322	642.829811212743	791.151959236893	511.186366165674	259.491353242834	271.80313853122	223.881789457188	299.302297387768	241.731116880585	615.778546656714	246.928857149699	570.410343989591	321.999620749443	1613.00648559407	783.341451943295	540.799765576214	223.625497357902	158.362923865589	235.43668093901	210.274666397036	284.583701254155	293.221213851535	332.735433848365	242.156190455	3233.43391479135	320.826752752138	356.4079902578	287.88958551389	223.14617553438	185.148971916726	2393.29596190773	230.934161883079	571.52130955577	213.334505792914	420.877811086169	261.561399807598	307.08199201102	239.003156168798	244.011220490696	296.102968720294	263.825308625737
S397489 RNA_004_PanCK-	374.253860448216	338.53331289964	1397.33635341353	91.9871699374772	493.358250391322	612.984388044936	872.77986894571	2495.83448780105	177.885301462422	878.658308713881	989.354599594322	719.486943091151	342.447094142706	287.574266691547	293.725853835032	457.805494096964	230.33117487365	734.924254056114	280.081563856053	418.297097795946	378.621838530088	3713.86944846528	1395.27271778514	472.267605826146	264.656519413806	130.787840834771	322.59539889929	274.266554134472	307.949976364609	321.300587660566	493.981372246186	266.724759846426	7385.2037015755	547.92995173172	557.681329261784	348.26352219854	288.855224712996	197.430405155667	3550.19164936372	222.620939109822	719.867073521793	254.728151047824	458.570291427326	307.060413572678	260.953715121189	261.9857473184	267.307797008695	334.880298411285	235.412757834211
S397489 RNA_005_PanCK-	230.547744635078	272.971458242482	620.647700088733	77.6396522156831	366.643386569231	2010.2128457283	4091.72203070185	812.686854615881	148.03719079125	502.225495336976	1072.73154183818	520.446452728546	183.741282809942	282.881609673869	258.549620016442	286.56556595825	253.217538831461	374.853874594447	236.789208915325	248.861114592237	281.075774265659	1326.92240791897	717.073304356058	346.582573214956	212.611050318372	112.243733179602	287.109239394868	202.885541629709	274.583331207941	235.134527207208	241.19454477047	259.382579041416	3274.97445001688	343.304211121244	248.167616177091	242.071368826213	274.898018124365	172.103171271648	1550.00158250921	204.114269383129	433.875879383169	228.05898951922	321.995996763522	246.378698387951	213.77397397332	206.102773929476	221.49625759723	279.61049637494	216.141908062368
S397489 RNA_006_PanCK-	153.802437753273	268.472263681869	704.503866642281	41.3046912787835	365.012057100127	1413.88326919108	2994.12064910633	644.132369733495	153.411179085369	497.772159991953	931.71091603413	405.321803528061	207.721513211659	197.510406376311	231.369111317294	280.238596210927	175.658056735058	433.653002046663	222.317433518964	212.958893350001	332.826350400552	1082.56576019256	696.127380191484	298.06315629778	179.917921701407	105.957589037114	254.793043981624	232.549920813934	243.161890175206	220.41636272988	228.013018784854	241.765261449907	2231.26329037341	304.399321102853	273.798418388122	232.283155451123	287.231616144735	137.523503338266	1813.18053731651	205.114129345118	478.711558508584	201.67500621109	455.399464826267	206.055105551717	193.532569632697	196.842339535326	242.815924099209	229.732220109386	207.838587253621
S397489 RNA_007_PanCK-	217.778551302302	460.727567038322	1168.52751194123	85.5627230051372	514.635651680382	3355.0371479504	4500.06892788058	1068.35841783592	188.957085413173	935.337612956201	1216.13375127047	827.473156985587	327.290316949615	299.49396731339	286.676969472485	457.703050369984	263.049462378427	627.749030128574	367.568971618839	303.211732663664	511.270906993915	1738.01797030204	1094.00373036142	468.520251465301	241.751490466677	161.891568144585	313.409924578201	309.796600028598	378.868841096542	367.84102310063	360.05180949584	333.10256389438	3934.03029405895	596.788939538268	460.456461723591	339.146872947906	425.490070975253	216.284907101865	2820.19292779111	292.982270227328	652.798300731412	303.319528270199	587.755251679926	309.06576136284	278.898448566522	267.367351415815	293.979315095763	277.817215122409	279.267833742759
S397489 RNA_008_PanCK-	208.126948444737	354.208558969258	925.871224987615	80.4930502360552	462.287710724405	3084.00060021313	3110.03006250225	1077.5393292404	199.308010181304	723.199405665301	776.822244264149	729.452394633185	283.635360042715	312.956850147669	321.531706099873	421.291477015631	245.425422037269	389.803998902587	308.976445893308	321.453181752389	449.261685317561	2040.242541826	1070.08018687659	426.170364584978	322.442761804318	171.278891499823	363.010229162254	319.269036141433	387.445746319142	284.232245899767	421.351420774513	288.680359740196	5102.94305777365	483.806392769695	401.996788878068	351.337131677477	369.668529287424	224.494094618417	2139.25598776073	287.499613909971	609.379316894606	280.726265220775	513.795864870535	325.511034316712	271.547346913272	330.228747176944	335.17672177572	332.080439107451	258.029503296607
S397489 RNA_009_PanCK-	141.637193533018	190.339153043787	2040.62492342736	28.7832657144718	189.157458646215	109.47418794984	273.488915008146	2279.5933211569	108.848646173188	1361.47901166307	285.189017322226	806.894150121024	399.099729209456	194.490629716524	164.137505944711	1296.96100963094	115.314923387179	580.823375700709	241.824178374921	200.953848238048	412.962157010348	2891.8566954492	2810.68350400208	235.701124121253	157.503854669171	83.6022906216934	251.446519278178	201.789193931085	305.006224323344	550.739666292095	385.092646303417	194.272340672161	12594.3722525751	502.149067654807	966.867013164985	300.537371196998	399.659721644011	321.4780272941	4439.48134590647	1521.31743246215	629.482895058862	201.224398740154	613.814219238574	270.483407841821	162.645501991164	208.259875089524	310.917522883306	270.427952191423	213.726211118612
S397489 RNA_010_PanCK-	119.686985652118	204.53331456793	2197.69705920885	38.8456316009058	200.014100466298	93.312859385068	232.502760999231	2466.40703832643	129.78107812957	1478.3288735687	303.151032616701	827.100592851557	399.522780405161	231.892673892779	228.108268063773	1164.04120363297	193.072285802101	672.874216203194	218.194788803983	241.961236054618	415.15230090334	3107.78402263245	2757.49418238013	290.10034231042	153.62175804848	100.495363320651	323.826286570895	215.70918548145	291.938726859849	521.595232232993	491.084254631699	212.039213550686	13218.8811197437	632.82288395123	1104.74639793963	353.618877132855	352.40608899859	304.465823994849	4389.3650807653	1792.53873037622	730.944276595783	234.136059810693	670.904538717906	284.633082386737	227.609143759186	245.532092260539	282.445222252966	313.323770746216	213.537858672706
S397489 RNA_011_PanCK-	128.801787545276	192.12958062808	1332.45381240611	19.8018632348844	205.387633872939	100.41913098799	283.131333588749	1485.19637181862	81.7186483316065	1010.89168028038	217.999891292021	719.592845612417	249.749536754784	203.53575713226	178.200244393858	846.862336643274	165.276180242611	443.984252800156	196.508902304552	200.44246403656	315.670309401351	2030.15493446156	2013.20434108719	225.213877090612	113.208859186814	88.4852352664858	267.652681755043	132.867653311262	236.45532960198	380.410949065703	404.539056865469	166.612824961715	8764.42871568119	447.524615692358	1008.28955114044	259.544830577143	392.788108548563	227.758458541536	3166.25852337484	1008.98897544556	576.733270662122	180.185538095226	517.080434289376	219.011227230942	128.038278274619	169.041981288258	206.948038379763	316.852279327173	195.688981409759
S397489 RNA_012_PanCK-	89.9077507338427	188.492877755771	1810.38982257846	39.4794692333642	198.622482445549	91.9616287083922	352.890122088858	2223.69800147719	101.028786998607	1004.76378322442	142.531085056347	726.938168960903	270.196884089555	147.088834260069	149.401731024444	1074.53148841317	130.815075861479	532.440596813957	177.718575308622	249.44753979296	236.213549468759	2706.89358274728	1807.56200828051	181.887555896139	98.4287603066405	66.5425842076118	176.430159694225	149.998704599739	238.923384289245	387.999281217205	256.864353790134	167.610350217663	13408.4001350702	248.906840822478	652.187038331273	271.611824701787	302.727297957383	318.867697134782	3085.79455866572	1836.32281995877	475.372964298043	184.00118406462	506.414962977345	283.491844633833	199.778957868256	150.343010025024	227.505431793741	211.224026637226	179.721443100697
S397505 RNA_001_PanCK-	473.88077362521	534.645931716213	1869.48899722432	66.7811561532835	565.029377881973	276.864996145001	3532.66230042036	3022.78494330804	265.421355308671	1463.61678799132	1068.66945123595	890.553138956881	419.667901291836	304.41349031343	403.917338704318	765.508275698795	380.444896471614	949.959718096589	466.673430191978	416.013993325713	801.903801113012	4936.51266211248	2302.02989899687	496.502397242296	345.130849725827	203.576687877914	450.301742103216	478.856569964015	464.763232058076	503.735413632851	494.454608235779	452.915437153908	11602.3993437779	888.822380422202	1036.36642272377	393.642241850863	723.03406938794	277.290838915275	5423.52091847461	359.806030258726	874.049502968352	427.252099462409	650.382072429711	424.431564869002	309.796469651271	388.067741519565	469.350447441578	472.926255392146	289.926554586298
S397505 RNA_002_PanCK-	408.495382941832	371.435347377194	1588.28613776075	81.5559908860931	566.780350399957	334.681938763382	2067.5098695596	2025.9272811143	180.150626313565	1044.29082921458	900.149368631499	673.655753327685	371.439197841944	242.654570506068	302.462537160893	369.326516500372	251.288677073543	804.45293074373	298.80840848218	366.633261702231	415.353284312172	3406.45715496701	1561.83283723253	516.081294097566	218.819474927846	154.508541269117	269.750361924137	319.638741038836	325.265326366758	388.297409281022	362.382267984479	340.811074838216	7639.65134273673	688.968838298527	654.109134073851	293.633284498834	384.174758621854	210.682378075404	4277.6171999688	256.773765460492	758.005817333325	325.123316195683	537.300173489665	308.839616282847	293.426818440346	297.436315635301	360.203380582311	291.95379424363	180.372426675431
S397505 RNA_003_PanCK-	392.910467518333	239.499432210842	1049.60943356051	88.0069121408629	754.050153754926	2704.30848892398	1165.45983050691	1338.09928239263	206.357773587788	841.437730441152	1343.90723800522	495.057990315475	338.519688292429	274.975395031112	327.088646243243	351.955157132824	367.503115588568	552.516104416619	321.341204881957	310.300583612567	424.982644929197	2219.28663061113	1190.31328742777	620.688496638727	231.398059906573	117.565932749442	235.184754005802	331.848719347154	356.272350829077	346.781471427072	309.762542955311	338.850017775247	5622.58788536554	375.24411368964	471.57568446943	337.844077152991	382.954731764091	197.179755949357	3310.84378740957	211.4886605926	517.703584328286	325.317847055241	573.50718023645	315.598893643368	247.778873854421	277.666388282697	360.852096672319	329.395440110221	144.095047722037
S397505 RNA_004_PanCK-	438.243855450744	274.484768251954	1651.56802972953	160.699880408043	1023.11908863025	1558.81536501101	1129.44152602347	3060.83779231385	228.732392205839	1321.36432719217	2324.77647644304	663.177027857639	451.673664069692	373.493440292972	409.258526482327	652.711857048122	364.554650946665	749.392286970726	400.946884271575	354.516994250232	576.904902074923	4981.467373741	1933.28114154491	1101.64565289812	272.70083466632	183.502503475485	350.720596671819	423.337004218514	439.889943180651	403.517196182088	721.705781039988	361.953524145376	11575.3807633213	500.229240803875	1093.79214567369	414.695671504866	502.901178667992	236.383377045327	4715.52380102011	284.731272800202	958.147491198231	426.038006968328	842.178000154676	409.394356922615	293.933370905059	331.172884290604	401.059272886286	458.314414932292	257.063783640852
S397505 RNA_005_PanCK-	102.334602733302	223.373651127461	889.904821007867	68.8376878986334	334.396172682913	1153.18977304226	2109.20325977247	1650.88517103697	153.444048710754	789.567989713529	1196.01328129515	373.578317580319	244.659563117099	201.193680815035	233.270132477214	402.322469172428	174.451288357801	367.996688416043	249.39064820256	189.231056860999	343.967500350778	2519.32913568045	1009.20712839229	546.363981129365	199.584425002319	107.783694611232	223.169299512095	173.849589571988	255.660061127602	271.886062964191	393.074907967992	222.179836878553	6185.85082190127	344.503224203689	778.529953778896	272.793538524904	312.09872895281	170.590214541256	2231.22557685105	192.352629269162	550.091774235667	229.166501763898	580.071623809315	258.338433535751	194.321715594503	191.162910750187	232.085192396	250.907381948679	153.559194761732
S397505 RNA_006_PanCK-	280.800225177693	228.216519383333	666.149999223014	89.6113315344212	700.406986503316	2666.17074023908	930.615673199809	579.084260786993	182.569292721786	438.837333277935	1537.35245517592	367.174571914139	212.155645827739	313.296213269731	374.588536446992	254.918321736489	348.271049929749	410.071126150895	256.021767182292	289.937517829619	328.909376598253	1184.65007044808	564.772262378741	434.805837788679	266.498824115219	136.609357751409	246.291309084926	311.396677875598	274.966229543625	289.213595540387	223.614379030223	253.178912849189	3014.71696431915	285.572210952801	362.340730823301	260.955299948726	338.02521384256	185.795592997138	1768.50970980818	208.638005557587	360.770010181158	304.924817977203	439.748685382555	326.76980058159	257.272636708844	262.683003394482	292.872922381475	268.539631061831	186.862909054824
S397505 RNA_007_PanCK-	319.050387206237	677.94793817853	2157.78757725708	135.699526021129	1169.59820275364	1420.14166219154	4843.96463917266	4296.46700507675	245.519107277278	1468.64026600847	1629.1301771783	906.554426585901	539.546268464154	321.359713501471	356.911304159401	794.814778096235	325.84978661598	956.027981305967	426.971334949201	363.931846985629	700.56449330945	6867.21224910943	3057.62213578089	721.980664488474	292.714402343116	173.701379112692	516.598337796547	612.493182335843	473.798934562568	526.576661052668	532.324277905513	469.980682484472	16244.258778759	1390.61157342166	1068.00520266177	396.580197340916	626.201858497286	295.512920557951	5756.12396870861	346.425841304818	971.758717979974	404.933606633678	989.036488665102	395.595546311125	384.137822941262	343.734266514833	481.262489512377	454.047134485827	273.114135436004
S397505 RNA_008_PanCK-	42.3266463550408	108.934598219472	219.343742524989	11.5874325646545	139.510308385668	478.951802706187	1046.85822648896	368.102670378777	68.4437685706483	202.66083378153	336.916737598437	147.677570525809	79.9020369575561	89.5003049394715	85.9474384311303	137.795706294473	92.7975771016677	130.470249924599	88.3108913368856	62.8156926810909	114.73990700439	777.065820669974	268.32409823194	120.807866306729	56.7422912751594	49.5338299047929	79.879432733665	96.1243161455805	99.1900104357806	99.6984323316498	81.4807378909289	102.431702594167	1690.17428288351	93.0005210222356	181.879873472869	86.0459811985729	117.761313594164	64.9041952955119	550.798320465249	70.9791344826631	103.228312291698	100.389805057237	169.24843231216	108.317388171057	118.676443317468	119.845573847626	79.3523595935008	100.895160173482	46.9832368885105
S397505 RNA_009_PanCK-	368.326789697555	387.744025581078	2615.1115857676	244.542114647652	1536.84464017117	1579.13372050509	2089.960523683	4822.18229219912	196.969476989965	1765.22242696916	1869.3926435607	913.834956277869	585.922507458709	295.609115944205	344.227184150436	886.263386766866	305.20637571739	916.734627239295	392.599654304451	307.376807831349	715.975846185922	7318.67800292621	3534.95506676086	1322.00121314443	238.321883287447	169.278009794397	406.241841583151	778.394318715578	382.301665414858	546.504879168542	784.188200589316	437.960263499109	19188.2607804317	894.919968330471	1541.89502468652	393.470313271571	624.6068517222	301.977003393742	7071.68062087129	250.281755170902	1160.00110316245	391.132536139273	1303.30855344078	434.375271043319	408.39101139728	380.728350607237	460.418272628044	475.470666637642	231.788111792568
S397505 RNA_010_PanCK-	77.9529426438464	110.037946905437	438.402508763665	38.9371677075553	123.824576718479	262.670758975687	451.912850335715	767.63374825212	33.7749184770499	292.306053688935	410.840786424982	179.673065774874	132.771881753724	62.3452561217822	74.172920478034	135.348381716674	62.9650758137598	237.823290918944	87.0519613133519	100.985323864612	121.883993087753	1059.4904483599	489.125690882639	198.382716913307	67.7852248258148	43.2125078422149	57.354336101484	76.7985960386986	94.9445616407387	109.804554653084	111.867495260857	96.6409168847548	2811.31055360676	169.025296773933	184.809921501338	70.2363648960487	87.4597528751728	77.3364981315971	1418.50124181755	45.5146127140324	205.839317170505	88.6263807717591	174.150787317625	70.7325966344656	64.7603816421757	78.8535283989743	96.3645080253858	100.426660919783	48.9246568213628
S397505 RNA_011_PanCK-	234.23511299337	255.552865189501	1187.45748747441	89.21697642968	468.324705396788	2028.82522632994	1391.93214349297	2686.69533896343	162.809895472818	883.564627950226	1193.69622812016	460.389948503463	234.232096167727	233.22959836285	226.14200834591	481.849289128144	238.030848180211	514.9136710217	247.416863171831	216.7563979981	361.921075716376	3857.96068838384	1608.72422625859	486.023276395993	178.222519261214	90.5041526497947	268.007218395828	892.541822694344	265.135490596907	279.515303368148	402.061724310847	239.065236805442	9816.34946759356	575.849918468031	453.83980545163	271.323018689317	354.378659795969	191.968403163807	3270.60948749571	189.173431564578	567.715919394106	234.113849771418	534.483459292356	252.390325863817	167.096805730658	237.240153388321	247.486216095121	281.531408488717	131.778741475101
S397505 RNA_012_PanCK-	37.6361737803628	53.7931862730071	285.309002743324	11.369223541898	76.6875291598666	151.877826585528	361.136081551791	1286.40094758377	46.9320952856661	206.798198132088	242.251296532418	135.840540662059	77.9973732441345	42.4190511091628	48.9651776825153	120.554049382139	63.4098612884732	110.97256520212	57.2757057889716	43.9697253485942	67.0848536029363	1728.46910282855	417.009707548165	117.661304765789	54.1690515384029	33.0335141839385	45.7188557126592	78.2378733617946	71.8510899850531	69.1126339622492	183.811032351222	55.2765166001862	4768.08546125568	134.735116475298	152.301939791815	69.9843824096903	67.1292556463362	46.596549027453	898.644065372048	49.2184899332195	153.13231492506	79.5571365846049	164.065298075206	67.1226989042226	56.0644668237913	38.7508212486438	74.9199946658985	42.1098774390605	37.5373263056902
S397537_001_PanCK-	257.346204286813	245.314730333538	564.958140373327	70.3182747653664	208.278580961033	932.040682878427	504.132036466249	548.232037224709	121.453399549837	387.402313471305	479.623854021438	388.927337490027	232.193856116845	266.495290409549	371.984156048087	256.754866164718	397.795367466149	308.388256180664	226.469328028451	275.283539831179	244.126334988793	970.732262999	415.111994211699	343.602126556023	248.50283209612	129.77249515634	284.730110291051	201.699630718739	257.927007486543	284.781226877164	285.622593745443	204.987266974674	1874.26719262429	274.327134352715	298.680928499723	210.422539785863	300.748184430541	185.072550095634	1400.54430826169	268.597520311855	465.913589167905	276.938725841769	337.516584094039	217.638039134441	224.725817042222	268.164681271099	285.743928182734	200.769733105115	267.654722764118
S397537_002_PanCK-	122.356157516863	103.957879454462	450.887855587703	57.5559603159087	173.954311693083	807.83338371713	394.291218207044	613.607964149311	51.3193376017095	229.316911815731	349.352443124416	197.29998827567	132.570207602237	126.038609578713	161.777801454971	144.944751261724	142.250702164216	185.612660360545	109.518922656867	148.827203294127	110.587869217242	1017.34281348201	323.417093079732	261.887406200754	102.616804928584	43.4499550385554	151.689870169201	184.745362281379	133.135532047087	130.902451206525	154.213861718369	103.861938048835	1948.69667581746	142.837560113172	220.779856698091	116.507334939871	126.215863703883	85.691241792401	1330.34741843974	101.55407287284	249.400203514161	116.58690331445	186.965336526646	113.37634334871	99.192550513158	124.643570967146	146.026336078297	100.831488205694	125.658450919114
S397537_003_PanCK-	98.0396301455254	78.8444916669462	244.542342190176	31.9328220111019	92.7485480432201	438.762933425037	127.092516732265	253.596752246653	50.1562859736962	197.782290585128	191.177692848051	168.735422245625	78.5652874036703	100.010924199027	149.219014286658	94.7637774582272	103.391529132593	132.026600984922	96.4934630611686	101.587149779934	99.4996942872941	456.950987684378	171.417096160905	135.429671546148	72.8842935473058	45.3661655933756	111.67106060747	82.0076469256143	113.238477810842	97.9779572557435	138.727555032857	64.1004929176262	805.676058576432	109.645016050104	136.680909211934	86.9941499591265	102.482652038507	56.6140123176239	624.758619789679	83.45098996535	205.04067887929	104.079698845676	149.641559699321	80.010517024881	88.7842314863959	82.1940291725832	127.780311121446	76.5795642462603	86.7972785946353
S397537_004_PanCK-	160.263821160413	120.552535890929	356.25951156949	39.2219315783288	132.748242038772	487.950703534794	271.481140725148	259.584118677041	65.8820549909269	209.894973378721	248.812799784115	251.890233965183	123.417294209278	141.122885280217	244.004732334356	137.773583676372	196.303510835685	165.225880241814	135.819141027654	142.720978284109	141.800086899157	479.531524529813	256.593437704956	215.007725175554	128.051759150354	58.3341481472767	160.935280754032	125.037563939029	162.28556199614	151.079686872959	129.050119589543	139.015702924729	946.658034375867	129.991556357832	155.128221446086	132.173846131926	150.511304924767	91.038784494983	810.960289526028	124.920272890353	247.100936546766	153.922992042943	203.147249697211	135.824939530962	119.186297651379	146.933916808959	160.751080980931	136.885576172662	153.970552827538
S397537_005_PanCK-	45.6163259887632	151.71105992932	303.413959199847	29.9784362234212	158.781580028091	678.375971003572	1291.48288105246	352.81720823453	65.6263862184145	316.743822369724	267.039061338177	226.680202208867	132.092816283404	101.440710800316	147.62007092861	189.131998367251	105.775266820612	123.411552181018	139.531711307972	110.482526081195	143.015947757416	543.21396303813	331.685206276372	169.082435746837	92.3421762381827	49.34414618703	103.708404295391	106.530128268752	137.450903944133	129.975943658232	100.981972767738	122.64254423093	1390.85436423843	141.0835370283	249.570687629946	110.971442011966	118.460859815957	68.8090543218979	895.770803632943	182.340492343492	196.423589267507	128.799156404147	225.196433059185	109.200254563013	85.4808206502564	118.52445108283	138.638172191405	119.280994505216	76.0254286385904
S397537_006_PanCK-	92.5447967183198	147.344389935674	365.256810237707	47.5692999878061	173.57516225879	947.28315081596	1198.22333043046	750.374884820276	60.8293305760532	273.43231213074	381.623799101068	222.86531868087	142.387347247256	109.002686980193	125.27088461375	162.758105450514	128.755883165395	129.086789950371	122.992086785346	104.204257278034	134.588603550954	1212.57721955836	448.907086275258	226.683346370907	107.176225751218	54.6041820749875	115.225750267595	107.932871560828	145.413682810835	116.862888428753	176.755307078128	108.49873013716	2776.63827242647	146.868555065898	234.192699667168	108.631552176493	139.956429989189	85.3538313378704	1405.46096903276	125.4049050058	227.456865784757	152.115788797179	245.642113566081	113.811584114382	98.9011849035242	124.488663345006	146.626278243275	122.316504077734	80.6564192155604
S397537_007_PanCK-	41.6667615837573	213.911950870203	275.794143656825	23.5572923826682	181.70653676674	812.766093984581	1056.11183508573	252.85435392253	71.2829344426742	210.802893352298	260.893732356136	259.093958482776	102.548982841425	93.0900227434241	133.456411292883	142.995945761979	110.825388790678	81.8706837237294	110.905411529586	98.1254704207232	122.771413724572	429.329239649076	265.137168133952	152.663600996327	75.0007366684521	61.8833660494343	113.035410500171	92.2338206901957	122.147443457039	101.362366412729	132.833270174698	126.391451332396	859.581435495	143.137350069583	358.63272285071	98.382011168476	95.642823555	79.6469983691009	1003.94943403426	117.493373324894	232.008561263862	134.145263216946	283.444248485083	118.152915046278	91.33551204376	122.764031259858	126.207159577843	99.2233159937494	78.9243963655149
S397537_008_PanCK-	86.2911584179074	180.923561463567	540.984481992094	62.5749708546544	186.841479498873	788.989251413236	993.630905906304	1149.2144192646	69.2234301617362	443.605156518043	311.013896162381	315.148709052731	147.908359106512	95.8517831152535	138.204870663882	288.079245756294	137.360696646345	174.096578487449	152.127854455098	127.587437083086	207.266870314906	1832.15407024411	613.836226955935	265.025090944181	115.908951485844	56.5898668286861	134.709719117796	108.791723902792	156.516442358286	148.589966100516	419.497721277285	116.864156068812	3992.35718905978	215.912928679751	487.861273779581	154.653019763726	148.884915812601	104.22796431863	1906.71252389591	168.589418992784	303.089376566623	169.681929569914	432.230921085901	132.6642259441	103.795172804445	146.006536714281	163.318028949105	137.142598803905	102.245378692109
S397537_009_PanCK-	93.4574316252999	236.283924719776	1500.56054958354	26.4922367693594	162.908296575873	87.5850826223631	644.521773435319	1761.96930145524	78.2130063932732	1172.95454860626	218.107372145654	663.529185394467	315.855383672804	139.927299934957	186.983060309958	1076.39596036877	219.008754526289	425.187830707485	236.453718511466	200.657190590502	308.527085630312	2332.46561088173	2089.47321024839	189.586411909826	94.4662786533959	58.5816686489078	266.230639816199	140.085125921644	250.776811337745	458.356342488884	319.9350506464	218.340141246658	8002.4415271542	404.776810319162	945.579862812093	196.018796760272	562.52802507361	241.877660495001	3547.32892528206	982.258646639295	464.184084903353	260.839956614607	366.356163750104	225.905621442044	133.504278043565	192.025560050766	279.621913619388	222.1058583738	127.999662459876
S397537_010_PanCK-	27.9007918265182	86.4413046361863	344.261472520587	20.7206970770448	79.0956698727357	150.148283775379	597.622535735509	455.131421836852	29.2658208811848	347.668177675471	108.637126498067	211.894149518008	83.8053861693839	54.7871226349455	82.0060841899936	241.339432724987	79.4758334990525	112.205398856419	68.5744346783616	57.2995035255838	86.0041868436341	692.477814717604	438.130122130478	91.1794718446311	52.8371283107854	25.5735051935283	55.7612689741694	54.5499732986827	72.5516366714215	132.287358947575	76.3020282056485	77.217367154898	2058.42324771774	125.272434455489	287.247371431981	63.5669746660137	107.259811107604	76.6857378603905	843.582229012889	283.130842193495	141.05125122949	62.8000641538862	135.579169560031	61.6763140651487	62.4706636688067	55.4786972681104	92.0620117730915	64.4224830683575	53.3661980308424
S397537_011_PanCK-	65.8922590532974	212.970013667238	1046.99303806185	32.6030264047438	138.481539440862	235.402165638137	1155.35101735091	1320.67169133036	55.0022200268237	772.607120944049	262.60839933173	502.016354235762	210.812974691255	116.459211939254	155.834806641516	747.517469028405	146.409217975812	279.493315657311	166.050259015419	144.080131292375	221.411336759213	1758.5425495575	1291.62077307573	165.299205156848	80.6527335385036	48.5688023730832	115.159827468232	124.320550626958	174.581351624858	353.816455548044	209.491801978157	138.093048508253	6284.70312816906	301.316376248621	647.039388782238	168.567824859663	265.242397235833	198.890113641438	1876.17067224159	981.870538147124	324.830915226954	159.530349026129	322.096672196746	183.289868076416	128.002748510492	137.494592160384	213.777624896104	170.239764392591	138.763155854297
S397537_012_PanCK-	29.2658992321925	45.042264364478	195.949323082258	8.75795476228949	37.0881978972754	35.8044669971238	567.214235838162	195.641960293928	15.0646195580541	133.746788189231	73.4242597589871	112.123777621641	43.6494519965995	30.2963021618295	32.4713377262093	106.673163649669	37.8568174939877	69.826685606327	37.0422823875673	38.0227248092777	51.4671768607291	339.946185554137	269.638948277898	36.7424126242018	19.9775037740181	10.7923442681957	30.1420666495283	30.6943761889552	58.1736545335462	43.3523829953459	41.851220099856	36.116937453826	995.127800309602	65.1212546221438	111.536019344526	34.3530935522015	45.6003000397709	30.901901117162	407.732915725068	91.2471471601256	70.7970578235382	44.2677874033015	58.4011920278076	35.0296037317665	34.2081373997072	43.0176486295411	56.8668490964089	32.6977593742061	30.2049222135808
S397514_001_PanCK-	314.037587388042	150.19882573767	568.55352851989	74.711385951544	304.083810544546	1865.41744714555	306.438336378945	442.351421575263	139.572225311024	320.399089992226	577.098954502821	370.203705189362	162.178480255193	189.258528009723	222.173914512195	178.104823443875	185.601695212315	327.607621529482	185.999235456825	245.534658133664	228.368100637056	875.233600764211	520.914544700946	256.855621772176	187.060871181678	86.4294029939386	221.98628538787	242.466915841407	254.694465079655	223.016476771066	203.166483190515	198.304732626393	1679.16647994331	272.808849023218	333.26713192474	213.099389648336	243.276562738862	137.300889975491	1376.08981703587	177.046075728455	417.668288523514	181.254847282506	375.557498135225	196.991448807871	141.478153153614	195.918844935279	191.325664171474	202.758058834729	143.78605639111
S397514_002_PanCK-	440.44735430383	170.187091965947	607.797735576867	82.6251673369641	198.838850136644	1443.57497774281	326.148552014489	447.085555218055	128.472963936331	349.138851653155	634.882102762929	373.178541398572	186.876002195192	185.838905990085	196.751056244166	182.249338251723	151.318081533376	338.303134803831	169.205268179947	273.985374368423	220.170029710681	748.897377455193	504.971344005988	271.534942803912	136.978764338454	72.6889541345942	167.394071358642	151.501572461172	194.028364513655	203.663574038861	180.788962534856	203.930090721761	1553.65948774007	295.985624964116	407.340283092399	168.971413479353	208.160632398446	135.70124262103	1506.51986906224	177.11353530973	396.605111631614	175.698047130326	337.607032314641	184.576416428714	143.671316947286	174.496749261075	207.073447133702	179.556912994662	128.556102515353
S397514_003_PanCK-	360.734728132004	196.030954820225	1045.34035501765	104.776801811405	344.029391578346	3058.20212247005	785.291481576203	1852.83621356765	166.089292401316	634.536309160453	890.016219156601	521.459103242519	244.820330880116	189.944847307661	213.284831727777	329.76040150486	152.351629725153	407.596793150991	220.851399029901	313.60301663877	268.83824897607	2658.79852264187	1182.73322893018	472.584875765954	155.233174085503	101.78372701387	161.458156422634	173.57687087645	216.977802948102	301.89528068202	407.189004972537	221.910866904865	5911.67276913326	456.7201608068	749.440068487249	213.262243842213	212.013410897589	155.42012117536	2441.0475322213	161.396697291567	591.95365025526	185.826194033287	618.107705132583	236.924626109853	177.868914170612	201.598481733911	216.961140317962	211.864462664048	147.554205430182
S397514_004_PanCK-	492.001631745942	169.595562371183	635.969434940466	67.4189440040118	258.328662731501	1868.87950645288	163.11074484467	335.712573079736	155.254577345278	272.26798118328	597.475645671649	382.666024516045	181.895617898028	216.058470175655	283.767523826349	168.861179930195	195.811237605287	382.580569226751	218.615802081691	266.374630964768	236.887377730592	498.660342029105	419.508107644379	362.70728930521	190.578712291537	107.818653577763	214.264666278686	205.887538706682	236.724868380315	230.40338552188	193.02919647398	231.437771445238	1072.36850527963	255.641529030431	372.213272980599	187.247392421565	235.134685314801	156.333587418926	1528.04526053425	188.078557387213	428.204113912316	203.512039570656	371.892239350463	217.910767449388	157.922999216931	230.423552086796	216.671394867578	191.50647349553	160.740879363787
S397514_005_PanCK-	258.589791133537	281.673765244536	2080.54871616849	57.5290150717893	374.801984969086	936.986410084264	3728.79229454319	3686.95951997593	187.082533429353	854.980698997956	1014.02333198523	719.943219443665	394.358332518013	207.768313104845	230.610132003126	954.076318320103	201.007602504766	710.887030510751	288.872536323632	255.37224768813	444.966282120637	4948.0198132032	2188.8595540257	301.043381888866	163.079764736636	94.00756408232	268.130427514484	195.086184566613	292.702323874278	475.29572546213	554.342946303726	282.965704452215	12580.3871690412	597.524964746401	944.396916862858	301.125898799766	411.078731109057	237.454925175397	5296.6503199655	701.01421269761	802.060790690244	226.650934832304	687.455710053512	288.817616770748	229.054470839711	266.520716620661	309.88832352516	309.585344680527	158.295135574125
S397514_006_PanCK-	281.822995368569	206.400172610131	834.641332341352	82.3192959626279	258.017542488015	1797.85847429327	2232.49416239982	1952.21217546645	154.395215405146	490.547763764057	1025.73295430539	436.135663077793	198.520882439227	168.079905502239	233.738779929256	300.363836485223	165.384588505311	323.725380182492	199.729330670074	194.961650494759	271.563899926097	2622.13022813435	987.322832595502	352.911806261803	141.086794288812	78.4832768346656	175.438873666335	155.257701366609	250.842852201237	240.952955712263	328.171436468058	199.760997468701	6402.29038245036	458.040617385828	633.922761990733	211.99676526985	219.164212320157	137.336773365176	2325.62537425467	163.432042346346	486.61044930393	188.820236609027	579.858064242994	204.405557932945	160.412238799368	207.859951226682	227.899893822609	204.349566360904	137.976781896098
S397514_007_PanCK-	346.501871205098	265.223640528314	962.534235126084	120.06408533016	382.248858839934	1818.76303246841	4327.57244684778	1610.28581366467	225.865901624069	527.226417074205	1243.9189672802	510.439846695475	221.853863153155	214.186425566923	264.548746100368	347.313717664363	203.196709228446	335.489363543209	260.827308661943	250.588773035297	311.734912665114	2114.15166220784	1078.28576818294	390.117492969988	227.36554863627	105.571790739778	243.775019832283	208.334918765955	272.706013822806	260.92901750953	303.418607223143	244.351342286058	5213.0997493541	421.961730044886	629.206615688937	219.868258601007	277.070184603593	180.444093589481	3785.36971856613	230.672729225921	624.463601194495	248.004024666467	805.070812921759	268.130807097503	192.56427500419	245.380783719882	266.462678033862	259.609689386515	148.417098462178
S397514_008_PanCK-	271.028525504738	281.954444784145	1108.12345343097	117.126592003957	400.882906168974	2591.82599162913	2943.26089101916	2153.99430157928	223.11724943559	709.13799463991	1236.32170530558	594.181274627412	300.179864710944	212.858979711623	272.068372264411	427.079400737678	213.933708535098	372.632018390539	290.580224386892	257.44468045666	354.261928125506	2893.06259144639	1318.78430360961	444.124833664345	187.916272014743	124.240537421272	239.473821855348	211.745415551586	262.110171231868	318.373650119712	460.604703766099	298.568241257067	6916.46305840122	622.366436973662	918.577421271174	249.507556257758	317.088088292622	221.614627576132	3745.24257424471	224.355340070091	600.568962173581	241.936347014772	1004.91409051831	282.2397815939	189.337992631669	257.311089615083	296.177923306989	264.608568621465	208.4917234148
S397514_009_PanCK-	143.033604392303	383.237172578439	3201.30779021755	52.7646351209833	281.763409421261	679.735349359187	1805.12533918905	5249.57063901519	179.933670803383	1388.00023060699	452.342406277514	1048.93917529598	519.391767024242	225.609905496846	232.494997709155	2158.90207441962	233.418277290988	645.555466835427	371.465752864827	315.919639924378	606.006689432398	7070.06228767425	3927.76738599714	351.08081064647	153.008731570816	88.2558624979282	301.667597879826	203.115424371041	333.007325983269	934.142493038775	491.631471270859	319.779682003373	21509.0008217035	598.602935578135	1875.008143907	495.486780602161	601.118782586822	489.17886825417	5448.58026983913	3141.22210996355	769.412868062133	265.225502045707	1268.4349382892	387.0925889578	250.135891430687	289.618857986754	351.268107211815	313.286881599637	326.958922919638
S397514_010_PanCK-	86.6319271735984	176.148833587361	1565.05118989775	30.2624951297633	140.172058447214	303.219536609052	630.223363595023	2295.68810178145	115.381881681457	759.021774240208	241.513798884691	610.828648961907	292.382644693064	137.392099093319	159.219219364903	1352.26859623597	151.592761808286	339.942151293334	239.855539314852	200.351712888028	451.221548961731	3059.81748708473	2386.12683759741	177.789960086028	98.4873021858854	70.8652612502624	218.975488224672	166.984928332137	248.338429859736	501.714830597261	288.048003451411	166.133689269956	8182.18952773232	283.216611991576	1103.7859573678	253.796892998492	640.062127135019	176.328696422834	2599.45540491968	1130.28198586595	436.084507872779	173.995001573211	544.082091393098	224.770702322223	138.404339470737	181.679822143506	229.636432290232	297.529278335854	99.5256286404238
S397514_011_PanCK-	103.436079203074	230.499810265249	1566.19178214306	34.592564963207	155.325445801858	895.505393139827	1645.54058672018	2376.84778519178	95.0576447073142	606.135698352763	298.098956622583	521.195920408467	305.9464063709	140.4122262549	144.310786932971	1129.49563023403	187.743237431726	393.525352617028	267.018041496583	184.60594916534	402.095471707603	2898.86853747363	2159.85163377627	193.13762054447	106.233613152108	62.7317211197769	174.201815561462	128.431940251973	219.754067069169	452.226058895213	259.999412959062	184.794650273416	8770.08419753764	365.040137130167	1137.00973989291	188.405116903565	584.925160635728	153.472138640201	2983.81579245894	728.806497603214	480.781924270964	164.978585684207	410.706694125496	255.761335034917	150.164733368404	162.54603171059	216.494298107897	250.155317322782	107.259073562514
S397514_012_PanCK-	77.133348543147	196.640077446901	2001.23768252801	32.6056223585137	161.419570091925	268.329171047375	690.217119944523	2470.87160600837	121.737747835827	797.749760948084	275.844627639086	573.748376582654	333.927467363161	156.042941360698	138.243043255144	1462.27682840857	165.278504741035	445.625365584104	185.807636892344	205.846438722167	292.595860436374	3399.59734474141	2332.57067664087	196.732842371254	83.838840445096	58.1450832226035	164.008355815564	140.602943251727	195.388372200144	501.465982675704	287.291360941325	176.47377055189	11350.3123756755	342.728622638506	1030.84019684709	246.122468176886	609.613706080081	287.995460975131	3209.17701967026	1535.1346980631	464.354263670875	170.653998004755	413.426635814629	248.895691704738	133.648283911668	167.242622081739	205.461063736818	263.028520310594	213.1255450333
S397514_013_PanCK-	347.842465665595	257.50491968632	818.08696565806	81.6981512355214	284.422832574957	2208.07703870215	787.61179638093	1057.09645399058	144.428691518786	452.786985564416	1314.07385329376	423.852460315726	227.552191272766	224.18694444157	236.095916872709	261.600818932248	265.837960269605	319.301106540806	263.968936909689	252.517270082632	306.552964928523	1921.126023944	608.366856422907	352.353863282997	214.005234290525	96.948772770394	216.989144719061	192.037526600109	263.958219502974	249.261050627625	245.107793020009	251.364226200042	3899.4034191161	303.371332193332	500.481836864387	229.731759645626	291.594820487634	146.111274547882	1832.2957713623	218.975608321697	427.599729287458	196.007987029236	388.031139647853	276.66532534029	173.062709041828	212.492302077565	227.02756556127	251.509648025499	191.749293306549
S397550 RNA_001_PanCK-	796.832604434402	492.278292132646	2207.40927210831	174.513416982139	1054.45214621474	10265.1729496519	1224.14012075991	1659.39370201351	309.977053157837	1608.39397247302	2417.59687599341	1072.69505212303	489.344602559912	405.828540727486	425.689081913716	481.02949760443	327.634928729873	990.063085004005	414.67830321502	529.498351021092	489.233275898333	2779.07711216052	1740.41319306084	860.123779561477	357.61978385035	213.465488555227	433.481311427151	393.501264590525	471.356058790186	505.524496916924	457.613741607932	459.659091004849	6099.44823563215	661.541867301878	784.511118199102	408.016156297052	464.444883289538	299.644001599803	5874.77215410281	355.139915375911	1127.82660272935	402.802520166477	879.182516335506	431.428953945304	448.683449997428	393.676259764634	492.744667560254	415.400233082275	289.111929709511
S397550 RNA_002_PanCK-	801.645479598883	528.42384488985	3452.3187987461	302.873655257519	1516.04533073454	9505.09358489746	2558.20323347021	3689.92629431003	295.344083252024	2048.72036865071	3031.95122379941	1180.69262251276	693.10613109812	461.872980083058	502.555176653992	627.385155031664	353.04625309558	1352.17345821681	440.785959925952	642.190471508553	593.178108034154	5977.1936883283	2685.56062041655	1133.43304357498	421.188632665746	242.984986868688	487.870342754549	396.923725300194	497.425091619189	614.645603662441	934.149799769171	508.221122194681	12266.1732911088	1094.32816027764	1186.44444643011	474.42398584505	503.114294855232	341.919384343482	9139.09408217141	410.838402453052	1429.26482711051	401.756312142513	1629.61067258216	509.568838796693	441.841939351119	380.313749250456	601.516537829781	452.081914907582	397.900163246702
S397550 RNA_003_PanCK-	1262.48974538337	479.078005877094	2741.48431512715	276.89100672858	1361.65662806905	12483.8142080783	2897.41408048718	1880.47858704957	295.103552969571	1991.9106949459	2761.61969500256	1107.59914053849	653.616043151442	442.439299969765	501.26347403177	594.91628117858	431.22001938711	1371.06763034743	404.898838360748	724.890416863883	593.658468883969	3235.82366914936	2424.66243680814	972.013932915747	509.208713571025	228.661276116226	725.864067043186	332.094510645628	498.291755555182	592.000081694405	557.073325547846	437.217641669781	7954.054030179	835.917569075109	971.998729229085	429.382825447839	507.623844743942	306.161560538813	7254.76638585411	346.985018292022	1323.4711282394	509.177051132477	1242.77215684653	597.892564273543	427.337478563242	373.737739580637	491.368900600385	555.574074449334	338.135309458745
S397550 RNA_004_PanCK-	773.262119462167	346.087388322871	1989.72951828935	173.795846237315	636.874886161309	7564.6344170162	1787.12264634876	1875.70256291048	210.163164884191	1506.91021163884	1790.88697588451	861.298986790551	473.306641407303	277.98181175915	337.37351278667	466.363523949341	290.599203453812	1001.69399242799	339.570997875207	478.330578509638	448.380251007808	3067.92744840615	1620.46595954615	721.863454871705	369.713472671171	176.092275647357	405.880168404664	277.742663703162	390.322500381145	400.652253941496	412.677220447174	311.056729356504	7154.13167033907	521.5294453526	689.591166333176	310.874694142091	367.685797322913	225.710711097637	5013.90713500573	304.728822375604	1020.27369126065	329.65396068162	766.93441065205	429.04967237955	325.537853927917	284.902688700423	378.676992279875	323.709882479378	244.050096755092
S397550 RNA_005_PanCK-	460.831008039739	270.573947217418	1019.6732769758	144.230474760715	480.11351787167	4898.89385912131	6398.70494040523	1101.11154185214	195.833020069351	860.987194615418	1770.10940534346	570.017478141266	350.542239292583	307.332052274462	332.237877180915	364.427682287917	326.019104113892	559.041508254952	346.084475801977	323.98378011312	424.642036373071	1779.20620355408	1011.45215631644	632.565678199644	327.073986367258	167.980943843407	450.97603482519	255.609438305196	340.17368768295	293.586086365219	336.136952980915	287.952650185402	4702.59339424722	410.777145710951	516.579672942496	260.492907791979	344.236803162492	192.271264356587	3362.25381401342	279.071764963379	790.118111654139	315.674085716173	798.658571415664	356.732305303507	252.342835309115	291.852328285308	320.210314261522	388.755690631994	222.856604550529
S397550 RNA_006_PanCK-	762.871919312455	439.253527487595	1520.15780911254	165.460867026299	727.661483334807	10243.5343100315	5919.49005340295	1972.92799184713	224.599153655235	1383.4677304103	1739.34897725486	883.72974831509	443.068142476988	393.919110856471	425.431350170883	570.09626476886	368.271608347931	788.277035746207	425.046117639563	448.242532232148	644.680156826777	3002.72744019204	1945.84642992115	640.65397980043	386.298350755506	248.945109884639	592.204378690665	421.117404570572	472.27773164848	431.525358069625	525.672432698074	405.825348777219	8084.87597198106	616.745013140251	875.152485034105	400.971695967622	470.989899739812	250.409131333311	4618.75938975042	332.560702271633	1010.99605770767	416.181696048762	945.5930059371	509.566660641454	355.212164043279	344.082817365114	444.586702573453	498.107118174364	259.113493425676
S397550 RNA_007_PanCK-	247.676467633952	316.059642418563	695.433399975159	78.8994123754115	387.409492103874	3262.0689659192	2707.24421201341	914.567432312683	190.477969438711	644.7847346324	753.046975494896	537.221111657575	245.156796474133	295.125034648609	294.245382295627	370.468862277674	263.883845790913	413.036992190491	258.283436230016	261.147924575254	356.454257316353	1427.91778220389	665.493370215835	334.882501987036	265.811666907066	155.715966443635	297.925234129554	394.999057763476	285.360615984853	262.97847316925	272.387726746641	298.736751309226	3794.49733454744	321.916083373426	351.528897192175	261.76714476805	290.747057793456	195.22992688011	1774.29296949157	254.502895419594	488.741703409765	256.750803562628	395.745058406938	280.098471499403	259.516851327039	241.296725174779	278.293333764643	284.817540164592	228.54853893555
S397550 RNA_008_PanCK-	813.430399181596	475.580836869831	1282.82609652623	161.321454699575	907.661087908457	5705.94322868401	7022.23499534344	1265.02315920337	247.590736054315	1190.22197207424	2526.39313698519	810.555161911554	483.34761373781	327.372173164355	406.034488317955	477.090762790401	385.579742256564	710.490536956604	389.899297310038	504.143750258072	490.098005810594	1961.10422619697	1454.93948809524	710.469435912529	450.66338075649	248.4816649002	561.257953893422	366.46998462926	380.248983779282	424.016635906149	450.368651873319	408.917598636572	5364.47993693719	633.739494189085	723.071464152613	368.211305537972	423.819011692353	279.656459720257	3747.79759957656	297.801311259829	914.145211373099	393.021764851698	915.908613595905	555.092690372235	329.318590899184	337.753776024827	397.392137913044	502.58686853917	261.772387267515
S397550 RNA_009_PanCK-	71.9473172218172	162.090592863413	951.458472073074	27.7533343540057	113.993106433778	152.471150072563	965.526195679801	1231.42942432535	38.5247052482303	845.444848205968	211.526384017441	346.138798413739	220.434616622026	88.0603365476221	113.409997731645	662.28651141676	95.9664293505297	354.346410948478	106.199074061701	115.522809630274	154.729004487791	1694.57859859106	1361.50262304587	118.640442622951	75.5562213798374	37.8939698709083	118.329301218635	74.9164461789495	107.764354990473	290.279048025558	130.285314697221	104.067127829204	7445.62940096984	306.176938277358	649.167598033993	157.303995245697	141.319384676691	148.4070882422	1917.68284376936	1114.54208851342	309.697133095588	85.2063628942966	271.097071179401	188.895722962955	104.030296745785	66.7059323436632	114.433144956816	105.677942999817	86.8096651376417
S397550 RNA_010_PanCK-	739.125799235727	595.007911270159	3244.86025673333	291.350961787418	1440.52373504695	7603.52286891967	4066.41467244393	5255.34050859788	266.531197083309	2537.14184299749	2485.09712351776	1282.26525264616	685.687323583878	449.106508541989	526.649966266537	1109.6759420856	393.257136898122	1436.59354286408	477.98004944258	657.423314839889	783.15686058687	8457.58238650128	4086.81819149624	1068.89851929084	482.940860441789	240.500752289253	561.277606212631	501.100536859448	578.142279509321	723.487780862484	1182.43652787617	486.714951540479	21058.5340390422	1113.47530977401	1943.7147267925	491.899062097119	648.897579831627	383.154442091287	8391.32112554093	297.85338611959	1434.72310995802	478.750693901593	1635.27522940029	578.449934177795	422.447780543991	400.392397590058	565.292215803591	489.638801564173	475.469626839462
S397550 RNA_011_PanCK-	75.6757453338598	152.370145878337	1099.78104365165	17.3067692889218	128.251689162365	480.564992701314	1540.84483203289	1031.00639182184	49.445899216328	981.672406720379	276.726403671792	356.518365770668	175.984546015058	93.1689570773473	108.924736742922	608.843330193681	99.0520372114382	367.786027419721	133.009682979621	126.950110321298	253.628483257871	1561.05010774296	1374.22706773962	110.896606558133	79.3728234717318	53.5401908186912	143.472401152785	85.9393501445204	140.071638939468	332.47803261572	153.115456974637	112.866986605644	6172.83175053544	251.520492146813	557.479187110572	163.410701189016	243.129798447784	147.481857550301	2106.00891282788	726.408013029012	409.881122606295	119.662395556312	367.335336155745	202.02073165763	110.033750282678	84.4083440191815	130.110423430385	135.331303541993	87.9901379071734
S397550 RNA_012_PanCK-	167.631512061327	148.897480977882	1142.94398495087	21.9535066663902	159.848751232621	84.4467423255882	2413.41766660956	1129.09145353279	63.0068501071533	756.495308582013	260.490070420808	464.388824765109	222.780110129815	118.099218876196	121.33507643756	909.477002040637	133.499686921482	482.338487363152	205.629672298246	226.635561311927	555.076343270814	1881.21251187127	2446.82717736695	177.255045206484	93.0118596650748	53.1374567516511	868.175256469692	508.582766405996	164.988404671626	322.635600929238	187.867222563768	179.571783367641	6060.1733557051	337.550071525685	798.761446683065	141.078472571962	559.351045841704	134.559321868941	2864.91557329327	102.382566743597	416.059491203931	149.82318954683	333.210681449516	168.098322636734	111.091885694825	185.249180409099	143.172648750699	206.048857703633	111.959318308583
S397553 RNA_001_PanCK-	228.637898420336	193.181605279997	660.245372885046	32.2257882787838	280.476052566639	430.746800135752	474.157047959325	515.786578778321	161.729961959118	438.756249094052	980.464713563743	318.651075820523	251.169698857666	212.238041396772	224.200213088154	251.55176754145	268.005300324511	347.988570214365	186.362367373583	263.519842765242	300.609104397401	1201.44868902001	398.392180952951	282.76927234333	210.626567494148	111.2664379842	233.544988000051	211.247704744261	246.679963216591	215.140144421486	207.460163817176	177.497560220291	2103.35943194216	268.591415265004	297.860282755668	248.02184460038	300.18406421404	128.012886490859	1355.61580419817	187.471546144883	340.719915963429	206.173964214371	252.755673932933	231.724074843402	206.8694769419	202.778330991957	203.710806812362	237.752378699494	203.320479294561
S397553 RNA_002_PanCK-	151.716051225	133.412111242631	368.148204938938	27.2354808347868	206.227480822008	246.626809738412	176.784890865787	155.115639491497	85.5549067733298	341.059911254092	449.750913304441	296.237184727875	131.079780167328	171.143956619697	209.18190003178	146.825391039356	222.009364237331	193.555209928195	170.980409600905	187.976096486745	179.545998282478	452.836597564012	223.09048575586	175.381354126358	151.391768561726	91.6854241153523	160.631611045727	162.261503798151	166.111856476502	171.166039730205	129.979028547093	137.232531422968	685.231481163491	172.140781951677	174.683877374924	191.600802070536	168.413098772562	98.2292136070915	629.491407335557	146.298551306004	233.38811106192	152.46612827942	197.373500836353	142.035946959424	163.232139250751	135.722862605888	120.353274027295	146.535786574115	179.844670556472
S397553 RNA_003_PanCK-	494.420301257002	320.210908501007	899.916570855133	87.4158352243136	395.135937708636	1338.85535987996	1310.46590433017	775.168766120569	261.199009857737	550.395934839834	1513.38277110944	592.979502242792	342.859913601817	314.523642109055	410.893938167485	400.164589199857	416.168787664231	606.148872672959	351.868654950188	458.596362657396	475.06652251922	1610.50334281943	701.711461381713	490.275909150986	353.797434983426	221.498328962479	412.540915258222	374.278123747148	414.125048728812	339.670290813511	314.00997378957	343.997016410035	3276.95357229168	485.884828080906	483.060534728852	368.099014783612	448.031417647895	238.077627496181	2245.47425682128	384.660075877136	614.870771863093	378.859327710479	472.864640679753	313.540910769209	308.059384755989	339.375495988158	351.967286545149	349.611012408516	352.809152544501
S397553 RNA_004_PanCK-	195.58542374724	207.270540674952	791.027364699773	23.0973603573529	201.027090530615	585.83866344762	742.372490271529	727.099397633978	111.624330949905	550.862906710118	908.800061360512	344.658975382496	228.710012128359	158.335184353786	197.445045008597	206.41847089515	198.186921167181	401.615955634644	187.151706961929	206.55688581944	223.870373968008	1527.40495065531	472.441793597671	233.725106959286	210.091937147383	97.614339358038	152.791260291108	207.440866996507	246.022322156236	169.666730055041	220.750858846523	181.904277834938	3428.58329337297	268.588877799814	381.863692882379	237.989301035431	225.417693329242	118.760413053656	1648.24231586137	184.02750429817	358.08656790969	139.376014724128	240.637839302399	183.885305685074	157.706064274831	138.200558894762	198.599203337565	211.212169431281	143.032477419835
S397553 RNA_005_PanCK-	130.173586073229	253.218548894578	601.842971154784	39.7260428683289	290.840350951198	1443.12690758987	2380.12984440094	509.292826977007	114.815755770314	547.663489546745	1574.67968299716	323.494022934548	236.773684972669	196.402357852292	201.285694458377	224.165597353126	188.480697365	260.384366925046	181.114271264966	196.508154927834	285.281302519171	1210.2940775605	462.784349589282	307.406293779154	204.121262640486	99.2700443679388	230.898620771001	193.852956517952	230.665949585358	213.299327226812	172.941536129558	175.587050264448	2491.56024561335	330.562567567429	259.918766652602	224.673196022972	282.978748540476	158.985465072134	1638.66930832986	170.119852134645	331.104562270237	188.750471100528	313.096963623733	172.454687472745	141.827323299157	204.339077534796	202.90484372712	238.702651575133	165.678241992447
S397553 RNA_006_PanCK-	98.0186701416541	198.310831524002	781.788007350366	57.0931898497143	526.723154812935	4657.64696639703	2959.99390101325	263.60106746464	150.835448915357	589.539979939397	1937.30970256432	457.655265645556	320.094483178695	252.929768292532	309.821378803019	267.955836614142	344.881269199993	378.696161804838	226.558602089996	282.629327383375	288.092307250891	725.243989567658	419.118157875603	306.723807849782	230.312333627184	131.793125270623	304.36785989399	227.337766508751	252.915460681048	276.797767754665	262.205342611908	234.179816032254	1140.91783029719	317.896294879835	266.991525282129	292.757421774738	370.693035812879	166.604700350496	2021.71171206667	240.503806365647	437.900102479069	193.593356504975	540.761750715974	258.422006527097	185.383727891251	193.25418311251	207.146770846099	222.594215664916	323.827246608361
S397553 RNA_007_PanCK-	156.271596165375	219.21857928736	641.23553443228	39.8510217404467	377.445719738411	2243.21453739054	1916.56911750935	256.337596957369	128.393997427254	450.988876129978	1763.82018751789	358.50820928906	233.559936413528	228.322524986119	299.513098796627	226.729263087824	327.861774131864	306.451398498342	219.837712771582	301.268608174393	274.731650707201	795.109931953639	345.141986627914	301.904027693322	223.378289390707	133.402770459752	296.264575993429	220.980479018509	269.016284083333	220.985792886653	209.155552638897	213.439569309307	1269.13350521836	389.809349519338	258.83328998657	285.84783289447	378.492006618035	155.642608930777	1474.12628262261	217.046717083995	415.680004136915	172.472020709079	422.726679986609	260.64916459367	156.500866175096	233.635320441552	219.899335038692	219.346822507764	303.069619636956
S397553 RNA_008_PanCK-	95.5680631076001	175.4803454995	440.221907643427	34.8838877935208	236.141679911193	1563.61895549748	1568.41949420796	155.99745683098	140.488298793984	416.229970247372	957.506227270656	332.159214101943	196.362893716796	261.828764700847	329.690171560252	228.926385153563	432.352888292033	306.062189450982	241.826861245139	269.053565452318	223.973369820064	483.337071534466	196.923416666544	213.936040533789	230.840927309814	121.161025164711	320.635326585463	216.305443750821	248.842382682948	247.94294514897	194.361179971966	174.742972605778	692.964338722902	263.93706863638	215.557743070548	302.971751594944	361.177288326541	181.09654750609	745.417956909362	221.900753342007	322.278070896767	175.134256988966	277.623767293833	242.182886544311	173.491386220383	264.218043536156	195.318659267143	223.652446533433	339.462524693086
S397553 RNA_009_PanCK-	13.3457562916089	45.5556351474567	210.402057294481	8.76855018030022	35.6144965644502	131.14492399744	331.003532895092	197.540350875284	14.1254748325256	181.986486457601	144.0202574011	105.97167697511	49.3585433279741	50.5086489585669	41.960611764656	90.3708465236267	45.1431315902835	76.9329864371353	43.0414035727792	30.1438150469081	52.3341147001082	393.638916232791	178.804094405471	43.0206384769692	27.8520366779865	21.0845825664588	38.0592916687172	48.493393451143	44.566869649823	50.2964858360985	64.691268081174	38.7565372760088	1154.68607577369	59.37993795309	111.530867387992	63.9711760096993	67.7764198732673	33.5418889201742	321.207714615733	107.423986977752	74.3960880776414	32.7246384896231	46.7967275094871	60.3966966883448	37.696323203206	35.7266243562791	45.3194404442591	50.1405137937741	40.6326785991029
S397553 RNA_010_PanCK-	31.884953834915	39.6332644315624	328.549759650666	14.3769996635528	48.2643235551107	170.904167694971	425.474681072248	322.849297127886	36.394702335186	245.702134670369	175.051371722052	144.868705952316	55.4939965134435	33.8786465025118	50.125003775247	146.544640027456	33.4839330074895	106.31805771015	52.5303687774695	50.5103343780975	78.564028518553	742.738532842267	257.676316556069	60.4603327174667	35.8807967994787	23.0469903029245	70.7926189570841	57.3093265331635	98.8948020713884	90.6620434798739	92.3363553252655	49.0208862414941	1875.96041813366	69.5428003179664	153.408256716854	57.7952956421492	116.41862926747	42.0884735268999	463.958218291998	175.649524801877	83.6438025523053	59.1306983633835	86.5357521742576	70.7335770707685	45.1868174340269	54.0717403891645	44.5837156625958	44.8422934104363	52.8215166651326
S397553 RNA_011_PanCK-	92.9374036682253	167.487539117656	661.818028033409	24.3365348047014	127.087321919764	346.536945815147	1213.02234767807	440.176268026471	94.4467881327199	575.773393219023	371.23757089858	401.069216687307	141.972898651593	123.384594526553	125.458018937811	345.532965965422	187.937692757071	277.579182718518	149.180340919096	152.698100698867	219.675462909909	1265.40914752234	523.021826777891	181.136676072238	108.924837411197	58.5188733508114	162.683134428991	151.831123627667	193.528328679303	230.082784755643	191.278086015137	99.7432243551973	3178.70472469908	246.375324431494	326.909941799448	185.041695628313	273.613090132386	106.996854586318	943.59102167922	365.90917485096	257.163264887363	138.006945279257	178.97510856565	202.458660169447	115.813364953112	141.454595954084	104.627029873394	148.362474701704	133.790177028953
S397553 RNA_012_PanCK-	103.775636872095	175.049892604193	1051.2700679934	40.7386365739311	121.299352561192	407.559545698724	1421.36745213292	822.249360695107	75.9890183108736	639.006219138277	436.877463176008	368.904520478258	206.387572107081	131.366317525814	143.133442439857	562.649697038933	174.778953746675	293.469037248924	191.107185586943	141.181993109658	296.65896325138	1750.41430090373	1278.32017923804	179.491800231205	97.0503084949079	53.2758691796071	195.436237661023	130.975862276644	216.808061762797	264.691565634726	195.756399862274	164.899490421998	4575.31957089754	235.545701557226	490.899604643435	132.403585727528	445.632214849294	107.210091798243	1784.06284708088	484.946974049501	281.972591352419	137.177587590386	256.564509039099	189.881543368979	138.265984045099	133.057365130094	149.604068706076	185.581820215899	135.622954715064
S397605_001_PanCK-	155.632934058103	204.519201505062	532.919110900586	26.3850967869899	228.00606632735	127.721999137281	1453.26504224379	464.999081171421	106.058223362507	551.72058966002	303.823607570458	475.355883387595	143.52269421872	151.603764482802	158.872781863585	154.498875872627	111.459862487507	455.765112112293	149.305471892452	160.462318846592	244.292524046331	877.260396588512	796.304201505951	235.930795021781	132.374832783974	61.7585136628798	139.508313558979	173.551726370612	201.12614193666	168.960189770544	190.708554752939	160.298016502368	2073.08608766282	370.713431142832	272.137671295209	145.20932942153	151.253816380703	102.680511311696	2009.90036256662	120.12001298614	325.44726185889	150.578572054033	266.845581933267	145.18250282516	150.471735101212	146.203509491994	174.497415256793	181.906797472107	97.3955982760048
S397605_002_PanCK-	137.215690332684	219.004646602099	590.746150825069	57.2798941208481	379.115199697737	600.372097878036	851.211370316149	703.723842614606	110.733703217202	540.560277225495	533.063926914353	450.522086489881	178.323410379977	159.913314997259	180.074589227782	215.675070478582	125.347030435291	324.670411313285	134.315394674987	199.857626075375	213.972225140058	1228.53956895423	751.419230723681	270.364712132084	129.338392936075	81.1366864624484	167.805002537349	179.306622986311	189.917100469422	184.693982880606	277.682276542402	171.949939798071	2564.22791386195	380.142989864807	272.287134032065	128.013328124589	177.459105076815	100.96557928007	1618.08649211229	130.07360023318	388.473722713868	156.289423403043	358.780547447562	182.942530450055	199.867266731451	161.689992846235	190.647804201512	175.581902404146	97.1436065910134
S397605_003_PanCK-	130.35382021017	255.16502793715	729.964913647547	67.3506248322712	358.366354926885	423.539203745592	1045.57615570584	648.824123366422	137.866364327228	634.107488793058	382.075890966088	522.864958709133	152.720410173429	162.533247683514	154.810470266866	216.264160002747	106.907314543461	370.781289526528	132.222820911143	247.293752790609	219.463545356409	1257.25605831289	742.027879308645	277.841333703193	159.864088844886	68.9696195318393	183.864215075522	191.38126077711	235.682557279268	185.992929238587	298.056964287365	181.902221669665	2475.9688221043	379.029078024424	332.705050139156	147.625521131926	171.314013191314	99.3804847518174	1888.98243502626	147.232952922228	409.69449703008	151.344512479918	327.925715907077	139.18167226007	147.331947923141	188.393840394696	235.083980716646	200.985634810422	132.23874030738
S397605_004_PanCK-	109.095458700876	184.997121215832	686.156922935475	36.3680702292791	390.902099813961	429.337772045329	935.803043347057	676.019531903051	99.9912539869403	507.739351045249	459.875018369759	424.800985207548	145.569664553972	144.185185856588	151.356128593064	215.5070703505	123.586572407191	370.267592708745	128.786457262578	193.527498195986	209.77249566968	1182.41340635836	758.232395467954	210.888869807163	102.898792233158	65.7786023278091	152.702624496832	140.644673385035	153.253852521396	179.655978440773	195.115828578152	164.641759996024	2462.64351280086	408.292914246038	352.39914746992	121.125395513529	166.133842116453	87.2770506511365	1834.55930633587	116.099654734534	366.655638139186	140.961691495529	327.861949653202	137.427171405615	177.461614318285	149.202722891453	189.934168308869	147.038560495543	112.342586480482
S397605_005_PanCK-	192.281430231612	212.249515912662	835.299294140004	23.7176769651441	181.058200249028	785.445193463269	1674.90031350591	1274.72697326685	96.9886870737256	341.404567616271	528.609423064977	478.995816669252	179.861123834391	152.63054893219	151.367666983349	306.296333281879	171.564904726	482.191248052502	147.603968838819	154.8178881301	241.732253656926	1940.32108692411	1082.49894679844	173.942155973509	122.681990359006	83.4126796432996	135.547643959626	249.688624221494	181.217550960551	216.680765389639	294.845650700474	112.795049021923	4864.87287063774	453.394527106475	383.533077983162	163.836764825741	236.132199587592	108.879759576405	2453.4585240938	112.658299582261	419.98736456334	99.1355363204041	329.16400272634	151.338833747852	165.581991094534	115.977957016165	153.951727388801	156.268717280835	129.020053648609
S397605_006_PanCK-	53.3155480879365	185.136861682275	202.071957813629	12.5682445189458	107.937708370999	292.244193070735	1006.13055809641	120.748413531308	127.309501722503	182.228623788593	256.893626603431	254.222726239749	80.1358855216639	113.738232074611	112.959447489735	78.0674003003108	104.526161915049	150.962597349448	134.369206687708	109.683397583038	136.718319718976	231.037501095553	237.007764435978	123.103729654678	101.36500428591	51.4814551350368	102.611587114974	251.902848871274	107.442362525239	91.7498092050914	173.313660618289	100.864024028812	459.070371203224	190.719211107126	228.045973746993	85.149218800296	95.6376547772904	98.4328005361293	623.851492926518	87.9200634913236	213.214846190042	87.8648542396819	196.914601126913	145.446431205492	119.248886240082	121.874199492288	122.370940255665	99.2087936389532	83.324807424971
S397605_007_PanCK-	89.2771284151647	229.402891898773	418.167519540553	26.3069784544941	211.427193528009	1788.01164647349	2227.80306198869	330.710305605017	104.052309405301	290.612058643037	512.106606301524	338.33070464641	116.998174036442	141.077917262499	135.625590615589	150.876215890396	119.195740552411	248.775056800132	128.003580557611	118.39055626983	167.944924610644	635.007035479721	481.70885907946	175.097708404786	108.451073937089	67.1734530399574	128.867677932868	169.559743347832	162.872326549177	131.880074741697	191.124047425312	123.734262432041	1410.57388042723	284.010007034217	232.298233903495	107.835697208792	156.803965224517	88.7263045184078	1128.3591382601	154.817361216116	314.768629290386	111.76549480094	257.332400245417	137.776629257549	117.274027649372	146.705072102844	161.093315662283	126.378923561088	97.1072392151618
S397605_008_PanCK-	61.916185650543	205.091506607113	278.333572941233	35.1377970056365	167.536717093908	1056.06001877246	2154.66904146801	181.775785173619	117.729643719774	278.909292778163	521.570559285014	331.116661306293	109.714412590076	111.974140044151	148.549602818179	132.035964427729	97.6517377727886	173.15085608099	143.207542597637	124.270299507627	164.229805572979	373.748550144625	321.335935322438	159.324018000486	118.103094387676	62.4031300743023	119.164452126211	140.711277326771	146.255833188663	115.273930995335	127.942726086622	160.184587476547	685.414844060494	231.4267971377	186.929126619835	118.489805740838	140.507351061585	84.6752307120853	881.341101217511	127.103472001523	290.319166883497	124.174248512135	221.15146688305	135.466050057959	109.42072858685	126.009995764831	141.018900183639	114.484198662913	103.658605653355
S397605_009_PanCK-	85.0502051084178	159.353221587062	852.644259999658	26.627786143234	157.914001633653	453.846653951037	1728.51876909583	1129.29110217756	71.9266758537536	1083.02893623279	263.723666427373	539.056732858118	202.554875553216	120.958586047726	133.334346307887	734.808895744219	134.469814530189	366.245645031245	164.792565296249	149.364218048792	335.249304060088	1622.62666040782	1664.37528008384	149.273771293097	90.8282203740898	50.1612207798602	277.502983279456	157.648777011203	204.825917927337	376.736257837048	251.228582612959	148.265816218244	5518.70276787941	308.521250666824	546.390615792501	141.075534106434	289.270522361364	194.855568961956	2056.86208818031	528.380438093193	387.499887077805	140.789796061447	379.019651879486	133.018719779292	83.2250138348356	140.204252846877	166.894466845051	147.162667558671	88.1884190740289
S397605_010_PanCK-	78.8114611493756	175.009279177699	1145.8235731685	38.7051616173259	125.254031820869	105.278239475489	917.960698769586	1785.99036058034	76.6699606793091	1111.69306139309	205.604283742538	729.240365188852	278.069235214124	121.426316772558	130.084674203477	969.271752099921	105.222811737767	459.738760262783	165.033082034941	113.142888829454	348.968176890926	2286.88401446265	2423.44314859078	135.705514706399	90.6196538860176	49.0039749870197	279.13563827039	130.748571029602	211.375012708364	431.264619503929	237.216307234888	152.921016451446	9317.76951952304	341.252929565442	796.174139256088	169.675327244042	407.702977158232	207.360968778073	2804.24184406788	822.303890600707	435.242850322522	133.146759487042	393.048794299229	172.431121669211	128.397576182972	126.070283240304	180.131235900524	124.196490939819	89.4834837815632
S397605_011_PanCK-	72.5151584313328	153.843354306322	762.103934401477	22.3539930990919	140.424523905519	406.464564859197	1087.08726871493	901.899860798023	90.5735313683207	914.153512319836	187.685233011971	543.944023099556	186.10432859531	124.815214649657	146.709633459964	639.020919055111	96.8948816777006	339.051399780379	141.328975484966	128.749763357651	271.132162930544	1286.0402959878	1357.35059497791	159.660775983696	92.3593695470874	53.8619885867697	136.342638953021	117.742259629241	167.998202542563	287.97712671177	187.243446883436	140.704049559991	4755.50287360926	315.032467707647	541.638946827276	109.000038460006	268.925296545796	156.416874315608	1561.17053290674	691.935673949171	312.048698751015	105.935820305167	336.499416188894	144.620571091847	181.876767474047	99.0652562634204	156.534115280197	115.441702869912	81.5447697806397
S397605_012_PanCK-	34.4065148371107	87.6173858674799	368.578237604422	15.6982406854852	84.0173385509863	269.584536609351	606.816480522768	391.25665317029	51.2380589214483	476.898920150759	123.272254304752	283.246616790418	87.4050937754311	65.2440266345712	52.9766497259254	288.671626931194	49.6024385581688	164.464764929166	54.4589297344005	72.3978221339682	114.870062936262	612.902847094877	603.862761307738	87.7317798772495	40.600338204715	32.1511994905318	86.5120373593183	81.7238299762616	97.3317326530835	153.80417030285	88.0232169963639	78.6049056832829	1882.76423770319	163.017525080177	231.648805801578	72.9885772459702	147.641333226919	70.0854498606121	832.007873886533	180.992509566112	171.455412808669	64.4544236766446	163.969481355268	69.2070159297664	46.3389528318564	70.2580409917565	88.439313345952	71.5286070991203	27.7536056327166
S397633_001_PanCK-	233.410874645888	178.177555298513	790.03641432744	84.8006171289359	326.409318853273	1871.76054388701	1044.13490407627	832.611916913584	125.063127411673	680.990211652645	1189.75512351109	394.456366999347	186.568446004827	189.508444801415	202.328911826111	262.287527753761	202.917029091124	447.459093978185	190.692745564753	242.565458206341	269.262638594352	2050.39340367993	518.887965000649	441.689473471057	168.822311309524	107.219714780928	206.754202661374	210.770526203259	255.919817932743	186.76273259219	320.524726796648	232.279304362655	3248.6603102865	302.858664754187	345.208393653942	214.727795977568	221.565806819839	121.399051331169	2566.78949327587	208.511015625744	436.757370324082	196.765144755691	418.68686914454	236.224030884483	193.909002134315	193.15733526483	231.4881046902	239.349954647671	136.982008140954
S397633_002_PanCK-	368.60973710658	297.254130664536	702.575614082247	66.9256848449705	338.569651822233	1845.23476682643	543.738481905653	491.544426652541	188.67142807021	546.482235023424	1265.8785909643	522.519660692953	294.024070132347	252.988104167131	304.750314380317	292.647461865126	277.257926024628	547.73687658352	321.758215038567	330.175047676498	400.856953242334	1352.6919907214	622.362838954638	560.83064536064	297.27956173138	147.516798559137	281.141662967981	276.804613826174	359.177076872691	284.002880208425	313.177025793868	324.464463506962	2004.50904660882	334.403811149571	381.197352644481	259.114596544693	364.625642165234	201.434407751608	1970.95406258528	263.120226479571	557.179080060694	303.570635627259	411.514437580377	290.167863987001	236.413704417765	267.438451158255	341.305237052496	326.161280467895	163.543876787439
S397633_003_PanCK-	568.13312012705	492.921121900657	2521.62335935226	138.029578236259	1279.68372410678	1958.3331499818	2918.80318448208	2055.32329257625	278.749721202509	2138.40037135677	2882.47568650843	1115.61414933923	530.36947416518	427.394085927632	506.877547583614	1011.81463168447	435.98287173738	1421.65065318487	479.079774961698	741.119564095798	773.343329684328	5606.06719119637	2561.58598592142	927.478687113252	373.301820516904	192.406738151984	470.399323628498	417.884437251734	606.829748133344	627.105143131504	675.199389936384	569.411342259172	8981.49241375244	1131.90596641215	1231.07060270628	453.461932411706	721.57368077135	329.588516294313	5611.09983118912	579.693343198325	1076.05541253525	521.531993197909	1038.38672755642	464.5392641292	361.196523252937	466.462618024873	482.315774007456	528.788900472257	290.608475803472
S397633_004_PanCK-	254.102114403719	440.209415085394	1817.55430465154	61.0206441158925	481.168537762599	555.550114596073	5438.1438643262	1301.16738367458	219.208259934675	1635.85529747047	1366.8413252107	954.944392296379	433.825105209485	308.673388177918	370.554788134788	1134.9115133702	367.558559302826	967.965800918119	376.457663629324	416.316444647057	751.896956484372	3803.63381437315	2495.35652677441	550.114630377819	283.951115431604	146.728339653065	429.066602806072	485.032407227971	460.316596933946	613.591487278638	428.80480631822	429.375269672993	7303.21406442865	710.750513774968	1251.41345088343	376.811063188193	946.461291897553	294.108148679758	3727.62152046374	561.53800945134	738.275780412771	402.109454300232	730.164103156002	381.875026491382	302.759702604321	378.671672252651	418.193288874811	418.715484555938	263.819013855939
S397633_005_PanCK-	216.018174840778	199.3403346573	421.761681141978	56.673527723286	260.567907697695	1444.3134065003	347.958914400383	505.214087623232	157.784670681158	386.138429402408	682.544650907698	402.020495518152	184.128698374471	205.161001329881	277.688146620948	249.069071606046	229.400726922197	311.314753395605	233.945548928017	220.891590034713	302.820325646548	1218.8376254167	339.799677622989	360.412518254869	223.062434348978	114.550335404934	202.8925581342	237.856891376571	285.740796167968	224.913493228386	229.225983138627	288.612715364259	1719.50958617202	266.056424369447	298.077615932673	218.609000477331	271.934219687401	158.553199854753	1059.51769764613	222.922429076726	320.909887871803	240.409998836565	318.725004992288	272.767289194448	161.70075669129	216.623773098794	264.575844197562	255.542779247757	136.162795679411
S397633_006_PanCK-	191.37943010264	224.796479668491	493.076180297932	39.7723625125525	219.676814595487	1548.68139868884	465.831523839363	457.681691998548	107.194514642113	404.522272004634	898.38388378752	299.491893142838	136.911430508684	175.427401746618	174.586413851764	163.718974698661	171.945960608305	303.320162662045	183.76636577234	160.188118214729	232.811973298326	990.653948460911	348.939097021148	265.962359608099	167.631759333433	87.0527210886302	226.136462002555	179.964149326036	200.100253259559	163.661809335353	187.270968541097	204.188914494839	1691.64891351546	258.976285624141	201.193404979962	178.161588387463	211.515520662748	114.104396227843	1530.31327091031	181.638835646836	284.23297733636	177.384769681533	302.922302742405	186.645309724384	128.817407350586	191.294188589367	200.420781967807	188.462388244194	132.909790848067
S397633_007_PanCK-	157.538488141945	179.426334377886	357.625601506939	41.0743532993643	233.90010101607	1184.28069238717	403.565727392139	248.637236705534	149.349937535293	402.291972663861	707.972215023975	322.596258063427	160.525305907352	168.690378932808	190.377845618311	185.145419835046	167.156557645251	251.233365502737	213.745430728821	185.26957000997	243.555832698154	564.88199157584	242.144538004183	318.474773858038	193.836339766078	96.8848509695713	196.857537303232	262.852733399666	269.35231702386	139.605678516402	228.897446214294	203.332093977011	803.716952030992	196.914180052025	293.456741826279	175.208763043548	207.624325119232	128.90223041732	1110.55817536489	179.992251766785	289.746358976409	196.150428431546	247.228221535156	248.272435372112	174.502758021012	220.68599849268	196.518955662174	191.253124180472	120.726698926598
S397633_009_PanCK-	136.270262976041	205.841694431292	2214.67163194054	48.2335502105354	212.523276279291	306.18284719353	1731.94787363972	2632.60901466586	101.98206585631	1269.60415331778	644.346694604007	694.539591246465	356.355186351281	145.626662487743	183.930372739737	1179.43390972097	200.467322499224	587.17427575336	197.429589578283	197.302015721023	298.099459480994	5323.04619155606	2120.79167191769	316.143625746954	123.2836974372	59.1985803166671	229.751084550857	138.679555124051	217.732745380806	627.014106782468	249.164577455498	198.532993546077	13988.0073998849	292.609481884755	1239.65084585928	344.034399010469	375.409771090879	298.997502383695	4239.72663178224	2207.39669635525	569.090806885489	200.100246585659	621.10275554939	264.001629576604	157.805403947691	144.557795621185	269.93502357777	222.136854112416	159.250850021769
S397633_010_PanCK-	221.528029607987	433.951862826492	3833.78160564473	70.9091501540721	492.641573159578	737.809248551005	4122.49766930989	3987.51246885856	226.454592292561	2662.25406241655	1158.03029814291	1405.59053111546	680.656869930241	299.009774364656	392.903031725633	2304.85359215272	450.456145715536	1180.97168559889	457.016682710135	458.911250424839	813.015141864903	8113.28717846766	4233.35717606036	503.53589275512	257.832172178336	168.511711740787	522.171574154698	361.194819299093	506.159481658694	1234.1678196706	545.513913143876	404.689946152386	21542.4622822721	711.394421583121	2233.09321580044	539.684784630803	1214.77602721577	458.873398939393	7133.98295252866	3223.37825381229	975.26290144309	412.872356800807	1230.69622278201	528.808620123681	342.592289041934	387.166268587027	591.20201503829	455.916011630201	270.651652194679
S397633_011_PanCK-	134.676843293148	261.01225314788	1809.69675033715	40.3357741246127	272.072304935139	784.598033478041	2391.00960964327	1950.76014842415	140.108593306178	1347.43048541071	921.56948130829	687.173666128521	363.992408276584	189.108181909342	221.672480546418	1254.12651613533	208.74225361328	506.513116098352	262.796142016065	251.993469457062	559.103980787164	4173.75738368	2230.96547742171	292.20745430197	160.150970977739	78.8044934134355	317.64466013549	253.807842661484	304.480094878878	646.002589607114	356.57662907959	238.452216210496	10370.0061583009	370.840035309289	1437.82962359451	274.893447310602	567.257215000802	232.474798447683	3587.28909353758	1402.28578746375	493.018994520289	252.011704437654	680.853686949611	313.796643333761	192.211783940973	239.405366805587	276.550762313619	277.171829505335	180.487262830113
S397633_012_PanCK-	95.0908779684622	152.749162943544	1673.5630739708	34.3013580044762	203.647408187569	124.923906105926	265.622692809908	2172.19817790058	103.606702202227	1066.14496440154	331.180412388037	547.524500090808	306.175753738361	146.262638951147	187.300167218407	989.656937421313	162.928711114512	371.889726893986	209.832059794522	214.780022615253	275.180736781359	4926.12974609033	2076.77740806565	269.340409328037	139.110046506466	72.6609318972693	201.742308357375	157.05637256114	197.60654868115	605.840094895276	227.926442443924	216.58603479527	10779.6207531717	234.129661853988	1086.0919785323	339.939320752505	267.236221754527	299.241960049892	2539.7522280554	2099.69595796989	434.462075869843	190.062001233606	716.420656665347	235.058114811341	131.043634457147	199.269797951275	208.941144920261	192.003392570059	124.321161519764
S397661_001_PanCK-	441.04249353599	228.390303567421	828.227184971031	92.6033943098771	650.691752152535	2546.22719334763	557.408300594174	718.249383236264	139.282079677424	466.842910971812	1029.5219788875	573.209689477309	198.074962362108	223.474250776209	233.945764027488	246.389445795317	183.69252367236	328.633868757612	192.750837941406	249.075744700294	268.130793567941	1449.62108267168	597.049644944241	511.831550282497	216.581367577421	104.233993572076	224.236612734949	181.877947890221	273.633871416127	230.460254238028	246.99862545836	265.913056816004	3101.46393629328	260.572038155665	312.698212205233	201.299453581443	233.927818748228	171.042242112562	2434.17557962093	183.215880500566	510.057348825137	201.784588610288	456.146524125561	240.99438592689	194.363869225792	196.235711644361	245.900352247072	217.185441237069	153.699902525886
S397661_002_PanCK-	444.840653635728	236.790953406686	1000.48137637966	76.6311717832529	643.05849003395	1132.36614125389	474.502451002112	1107.71133215018	140.947428723145	572.630478936731	933.372550754653	662.993209409535	251.365347091548	218.995387536825	219.995842463955	323.556345187442	171.682588305365	400.476493404433	219.033451173987	333.951872947693	328.064373227553	2076.61025105335	977.995226909112	468.361691151754	212.465244547534	93.8675299983976	256.84330623895	407.334620604106	281.135252336968	261.113134455573	321.081535759817	225.744839774094	4792.9225881185	345.330019544137	405.370325369787	233.868636659773	284.147190925783	157.480373967631	2830.43335424438	184.17496612357	530.953400719664	230.269949996208	498.506704340368	258.28934263719	194.739721318133	213.601361538281	245.990171465963	236.833643028849	156.322611861837
S397661_003_PanCK-	318.843684072754	235.974827660463	953.562283084784	43.3210608078105	368.811679284015	1148.87671382695	771.386404354796	1045.03310212212	119.212455529843	544.912529367057	493.016158357374	654.118382037226	231.089172736054	217.800277890377	200.496032075489	316.520350056093	126.294406586819	437.959497056135	184.441346741043	290.463825692172	294.637258670217	2083.91413707297	1154.3634303251	317.285909494879	171.599942757254	88.7248511523456	209.560401055891	582.609093178988	247.435607585747	249.670533438493	260.986988424828	230.885101045761	4746.15343127984	282.979719820333	425.533780505306	188.184004396198	246.682079947707	175.051247456622	2526.20398353538	169.20220211642	529.984549479437	193.973607921047	469.460684498643	220.888703342114	174.461517704496	184.190717970896	214.877356661983	196.001157234132	136.976831824365
S397661_004_PanCK-	160.439003521394	157.072607477845	707.276809570934	22.9991345136162	219.466155372236	296.884306795973	635.706385607983	730.136503154148	71.6163228614758	319.512837390426	243.460424187323	362.559866394097	118.416645883385	98.6710047794708	72.8629501329744	179.71673937125	69.4720319212906	273.183036747061	97.678062631991	208.873154091541	130.227120994695	1247.15276013443	686.183711352592	174.084415967919	74.0923985595079	37.1122340229951	125.182038014162	616.396632705672	130.595261437792	135.495545469568	148.954732091905	112.53297991901	2549.18180506448	220.856562316639	268.981966610257	130.357516687462	131.094515840764	77.7355914418588	1733.55722803065	68.5265615899876	306.190862325133	96.982887848306	251.34961297465	94.278279307157	81.8992204661807	99.1211038489224	138.020666482804	90.5270769181037	66.7260305058082
S397661_005_PanCK-	214.945752385966	426.057890852898	1406.27337572466	73.7204771194951	435.004131125974	3284.95831571516	2593.83381711402	1470.30848247796	129.015695954968	591.238660170137	1444.60857826771	730.056287314347	270.036466386751	197.115656620674	194.793435969381	441.625597385254	158.221979236458	572.865264009105	205.119510345672	202.445290834578	310.96552971617	2871.49539159205	1502.56965797852	405.339117430522	156.035683951716	92.0217001633023	210.234144987219	216.936559894763	243.463524733339	286.43836114256	501.238014237055	280.324260896272	6482.25553146338	712.051949249995	568.943919852968	211.036263931428	293.31489450548	176.310229782782	3421.6899170054	196.113244334105	674.789887401304	184.583264414894	642.584407183253	206.710537286722	197.033237921719	172.714362540249	242.630116016911	206.300925571998	163.51719370717
S397661_006_PanCK-	315.432178651779	599.41675299901	2025.32194329559	122.189139676892	884.42402462787	5909.01641431306	4293.48927538191	2108.7853084991	172.080440629939	925.836819375047	2071.69007585249	988.983763978212	464.431268388846	315.033938317253	336.612333628299	591.083844658209	283.914623865603	868.891946040905	316.977030862938	376.122678835079	477.347221479857	3932.68926398656	1835.82653412872	660.569249179431	271.237780880996	147.001596810704	329.973827081561	649.518042744324	372.027127977471	458.236623857217	573.604969850728	357.599686448897	9205.95185292415	787.557811589982	807.976873991962	320.475324150003	417.170768146399	309.150861893241	4828.99826090359	248.392817618417	1009.15887941283	260.752982960787	987.205040242962	327.134278045882	342.628538843086	282.000006388914	359.153741947609	327.335295469943	247.979660878961
S397661_007_PanCK-	296.454133939541	543.72916947018	1946.31119256971	92.8839042009041	678.787326125212	3171.05801183203	3348.03755331723	1845.71920577277	187.425999339751	923.64261465301	1748.37065361276	945.069684013901	420.243403421717	281.967963403515	272.330392689644	510.357857392211	255.517776148545	812.844246191167	278.703282967758	425.541596512531	390.982047564646	3530.02779238121	1537.61334681631	589.347879259846	267.318616144509	139.175049140666	333.126610145483	756.788554974231	309.969905008108	443.545953888386	628.097181605318	352.23231269709	8047.21042766867	690.740712942462	939.522935804358	331.387514305618	341.864407389559	243.990864454882	4199.06198012521	257.841781209275	923.573870296692	264.305923706866	797.896389489737	311.733153650778	299.359741978233	273.837588678691	385.960253284158	339.77056579378	224.665739958989
S397661_009_PanCK-	24.1520654246753	75.0851424218512	226.829592668657	9.48907259955494	98.4219588709075	241.33384357591	398.353446040647	166.476154638931	18.511838201111	102.442981642704	143.914375831287	115.343701920898	44.6907176583092	37.317562246963	26.1409392041788	113.664357342624	28.663041826615	69.2306790135607	51.8717967837128	48.4749564676371	46.2901284526519	419.877001482036	265.387065195428	49.1234424085933	28.4165609423297	11.7783924824644	37.8752684741454	43.1787172667785	48.3348769753844	64.0052052054213	57.7441972299616	37.3170039897724	1031.38917950357	115.279750590581	108.974422348665	26.8917062729622	38.2218238148297	28.7216000921305	392.295807516699	68.0189955715786	116.926259220272	34.3976372622331	133.987692919438	40.3655378412709	32.9010813204923	27.5260000716015	42.6119831611299	67.3924172736415	33.5522921357381
S397661_010_PanCK-	39.8847116103776	94.2044307330306	240.493858805481	21.36852390516	69.4167875221874	390.849153191938	588.326325708007	247.248273713734	25.2526819844426	176.238132522437	159.16210695717	182.632127915495	52.963621745205	43.8322770959307	34.4371979326732	135.879689514556	46.6263890627242	109.511058278438	47.7126143888154	63.6773490989179	105.54415116558	517.257585056274	360.912446727356	78.4407006605957	42.7579548848554	26.2586243385181	56.6995572368853	114.209363973243	57.813138476462	59.1131315369739	60.187467770633	50.1275451087426	1180.63540340255	124.550475380515	121.798010297223	41.7280152184828	84.7728518031201	45.5982842543859	574.315104014142	43.1835889307838	132.57427728215	34.8571503572526	122.757843935531	40.9047752628462	43.2526730460505	44.629945523986	39.2556641118498	50.1910226097143	34.0005123866452
S397638_001_PanCK-	423.893548751822	547.892212899822	2911.01709035565	100.688257201111	603.234185198446	277.067834475651	8946.4432713885	4555.38140395757	214.884756376665	1830.4049903488	918.299629809047	1300.22672283023	571.658793735823	357.522593033006	423.349159817603	1250.28994664322	399.422124073493	1144.81346662757	434.089917785146	463.201283121024	615.284140542017	6909.84903824519	3288.07566385341	604.086994054886	313.280085779507	157.083728263409	487.893527964266	369.893817075766	498.50004241292	718.224460143453	548.464032850082	542.328792203395	17779.1899941667	992.205171482488	1685.80337302612	459.951166802069	765.925964429651	405.848623953471	7136.78156008336	551.242326458633	1162.30349398684	474.800890196541	1063.27125299918	406.656609157152	431.743805918048	398.319848784084	635.304519523553	407.24868740089	344.925386461234
S397638_002_PanCK-	323.637306420448	559.92048016129	2864.0904051566	120.986332290064	646.331007298931	662.727873427459	6522.14235547201	4899.99365628897	192.662064933798	1619.64518593814	1296.54895565342	1184.41960716022	618.515398173983	350.206508591659	415.140274109316	1164.7883487045	374.823129909866	970.627366428289	408.199342426059	425.764882024269	488.017551136591	7227.41986445904	2831.55925562688	603.999267114774	313.73291297652	157.914965176626	487.352055509333	363.116792947001	433.962229158698	706.61052038013	628.979128522404	557.014350462837	18479.327437699	1008.59601755603	1840.90653181372	431.904170165335	607.129726921916	460.926958114004	7439.22703506313	741.387812871482	1150.63884080188	469.605657591789	1775.21660763353	399.49346519778	429.92626281569	387.677664617	581.658039562335	404.636231083154	334.418136432104
S397638_003_PanCK-	370.376490713895	463.545951381276	2847.99140077671	174.273528371286	1204.09589413776	240.448137326788	3244.07844733294	4464.34983833056	186.637561378835	1599.82559984138	1187.57092921356	1084.04788656437	681.66084025478	338.901605776697	373.958244664382	1172.31716387678	316.635215972674	984.640789682534	401.830659574236	500.772205612215	532.786557350207	6612.02036944253	2468.32907865035	734.137603564408	297.457451809313	127.92495706233	541.338081616425	363.593574606833	400.585121606491	594.882473482109	841.89756642074	526.444183145963	16169.5119724518	840.51461932095	2223.48228288745	350.923503978807	503.248132207734	334.204144656517	7717.41373703404	343.396355436885	1130.43974217026	424.205148797999	2030.92392333608	322.752403497467	417.516011561206	340.887410136844	547.126747585951	572.690122851216	330.904833113184
S397638_004_PanCK-	363.0085955917	582.506725854275	2468.78658222425	92.7165294950215	497.251191928963	160.013291739625	1347.7003393876	2278.47018158526	148.367166903871	1816.47115950417	579.686123568569	1119.37031878636	480.97710724455	288.683914276835	381.423031102465	809.31646672862	338.370850904486	1108.68717673697	366.324675538332	388.671591802001	454.015645342884	4062.28076790837	2500.5771205913	491.800019970151	282.072043016665	126.880391407399	457.115641610401	249.141002115183	390.643915601739	503.034623438314	467.806096290151	419.883470023364	10158.8538332654	1074.49049501235	1183.74024839604	330.14614322871	538.638702411427	296.31650472341	5748.37475782931	474.767620665493	893.61123955212	456.271821703419	887.281119604009	339.316890722696	361.046653707177	321.99057733376	472.004864755909	315.954905723171	323.485803484996
S397638_005_PanCK-	491.674175514338	444.726724570907	1558.13197931138	119.905076450577	617.500624688911	6927.68451998081	3080.26742990059	2359.07758658336	210.75089716397	1160.81901916491	1659.79029552845	825.706533140211	458.431451465048	350.564165284373	472.789474216592	636.574315904475	346.977966492354	621.521236978837	395.986314470846	337.674711069335	482.032587229303	3678.42956005643	1498.70649214389	758.976859929606	368.396509440871	143.313693459687	386.485366840691	346.900275196757	443.077683565514	450.843787902278	414.662924188027	476.159659448764	8066.90541616957	741.544290422275	854.052561858266	402.608275417603	482.027927699471	283.323468173006	4792.4278222146	360.923272644928	846.881843290765	474.425849998913	955.944500856587	408.209142288479	348.275213664861	374.664536768675	467.230950282375	358.486183823037	317.535275681102
S397638_006_PanCK-	371.984949879183	244.977207492988	1545.73072306166	182.41218427505	651.832119372409	5393.10518894985	2563.88373887671	2716.05838602022	162.881679785186	982.013606426814	1805.53480642565	716.10147348788	345.09554918836	257.165813863484	290.048451064851	422.059161714672	247.325148270915	409.187682928922	264.139475780281	244.782640027159	322.648619424288	3936.06683698816	1136.67056944528	778.812789947891	267.570309944457	119.658170204449	243.638736124595	238.442411481103	297.230368889082	362.212035700084	438.394122620771	362.610440787005	9071.3668652393	458.788222975609	1156.05472965064	265.229692559708	317.309814143658	230.743579314227	5199.1029350335	254.17676483596	826.475973607681	302.402972507605	1542.4038959836	270.468841176619	270.911823208789	272.742908268229	363.750537083252	286.640457037571	212.458128494049
S397638_007_PanCK-	410.95067074219	384.881406438034	2417.75104503937	166.462930218848	733.53631224845	7460.24079367702	2599.55808414508	7364.41424676612	219.865050274891	1600.53577081107	1753.07473279734	1063.89465391537	508.966522627794	383.212571414743	477.000164214801	927.636870443346	405.324681039071	716.462566231725	477.415170927247	433.981988352961	553.914559080753	10157.3647312099	2245.14819016182	905.353798742687	393.692418317481	182.013940249958	401.287539367762	316.245431388169	522.406220831917	574.507766191704	907.83874839851	459.061612815462	23289.3066803131	852.671216760651	1709.20484350007	492.062287724354	522.812449215816	311.102749736163	7275.70179097761	393.466717234611	1190.20020679068	473.399945057591	1714.47838816379	443.873076143529	417.707655937233	450.437607888913	565.043519359448	415.988110663322	330.343994490525
S397638_008_PanCK-	295.936140498438	548.559312284132	2575.52613664941	137.821316711986	844.590224309604	2827.9532538797	5038.16370410908	4104.44130529308	179.4400011655	1381.37434990493	1271.98434197059	1036.34804515133	516.702403341016	320.295540762456	370.154359594317	856.655857927813	312.641968511176	782.573663020074	340.696669793299	337.767174415542	417.62595226781	6359.59042425079	1972.6517745117	921.976421077353	246.93275859958	118.522587781161	407.820514502268	304.188809176944	408.876034620768	578.812891748188	641.278689942574	465.768409258975	14752.6953645375	839.580282793487	1705.06017436935	363.16247497695	438.335903556379	318.313071355472	6697.96250453024	352.656892073218	1044.96035267867	419.064059749873	1577.30076318152	312.284712226232	427.198569938273	315.235687219382	499.613870452929	396.068645363576	305.176356413093
S397638_009_PanCK-	227.269627409718	556.798767091255	8809.92985233771	84.2046893285471	465.604820098712	212.285957490907	1353.98368020704	9356.60435944578	189.407563671868	3669.81025675697	693.113291858153	2692.45869949454	1419.95064313083	590.899344559612	480.565954110915	6538.36174197335	642.45382545564	1842.75421703443	629.619958058222	573.508303456703	813.346939321929	10612.6518727964	10353.8364771783	531.443172423369	302.781085807168	183.81164257624	1478.46799994405	944.370408398451	652.539367169946	2159.25434743336	1150.64551726397	691.846047582288	45234.3432521479	886.860168900735	5552.88596645931	781.625162564789	2767.82612437865	1284.59376502648	20040.5447100842	6212.2677512462	1960.38457985842	783.342337104993	2491.50677528945	697.180171764771	478.805848750486	515.656808149882	1043.44081835765	715.710672789495	668.403560565279
S397638_010_PanCK-	79.8955842722085	220.488765120833	3128.63358218208	32.3007530575054	185.153183790135	299.319368958318	782.04246905124	2726.55386871368	84.9942424532664	1281.41272639131	228.206355961164	766.97695322588	388.637079548035	150.529602825815	161.336441161704	1615.28123090889	161.223967330027	565.524057201882	170.718705550894	189.918523506678	269.537728074621	3693.56771706505	2188.74328114554	227.975257605761	109.202108421624	62.9853073599543	154.51766090097	134.351814844854	225.300812041555	607.020473425612	239.996631880791	241.097648415871	15233.4724279778	347.398382600401	1367.84622682003	272.991736811231	380.787800885564	463.301515043993	5227.5456855232	2470.27847793422	583.755505565558	227.803333161482	885.662484509502	224.2627442242	181.142763293754	169.632247005571	299.27954793732	172.831314092754	293.798743215338
S397638_011_PanCK-	65.7212450934913	239.601532327734	1503.00755225686	22.1638635897743	133.119669614952	941.10106957103	1245.39667535016	1677.95565586959	56.9768526475853	1066.70113534181	283.887740647917	587.856839579446	277.683199051412	120.824112460787	155.664089492536	1001.45178873182	141.669317855706	382.205504879322	172.644018756695	126.364761005107	201.87490155085	2415.24759801358	1831.44095936373	209.22862223772	112.620775221552	54.8327300065987	184.430259949315	108.661312698196	175.362985195518	463.875364775008	235.420091493808	186.300662960705	9956.72754611104	358.702291780009	930.454857903241	156.974019423233	328.893530844141	277.520962543818	3032.84254343869	1308.18873403189	409.01262694439	176.845830367039	624.459770065951	173.922558988639	129.149727993622	136.199433674205	270.641974739143	190.69910141155	148.511936476837
S397638_012_PanCK-	95.4165749218173	281.276009837228	2357.29744219105	52.1778495866918	186.185196397353	900.674755520047	1451.68187814427	2098.22389123143	82.9225684967195	1329.44673990962	487.932272557822	806.95319831974	408.874712282249	173.435317685352	196.610832955044	1606.6657183384	181.523238842924	507.221249812533	237.880643749918	198.442191606726	393.435358451741	3058.82024897413	2732.60063428435	251.776969758213	122.857821717054	56.237687374564	231.544640546908	143.274612004116	269.132620319413	626.700770711618	308.45923739034	254.895349284914	11006.5844529598	468.023393453415	1702.67511813147	209.648989649763	682.881100350231	280.488497795127	4768.126429719	1306.85777311844	658.592061582051	245.294652798617	1169.67481636312	210.210505800125	174.847457621922	214.545047388364	341.915457203892	312.481903574561	202.469841841419
S397641_001_PanCK-	122.86938223009	171.266470450111	620.777229088444	26.7505532118893	360.277541343329	81.0116479736883	291.9248580663	426.92688663408	62.2916317897474	432.846645998215	411.601860956563	329.018638088532	130.552458084899	89.7841074662747	107.491111825103	231.517649827939	82.4901709855453	341.994592988654	111.709839480502	192.416921603786	137.406560875773	912.36320648514	527.142053937473	166.701049063792	65.5436073106299	43.9671430894116	137.818539479759	93.4811594903089	122.703671823525	160.195440929013	184.036514080796	108.574505699709	2111.42668953736	294.413782273507	239.052646592883	111.754618057719	129.973934848555	70.3590832764316	1372.11839502998	93.2070975612304	267.547643654099	100.109120684103	323.571758821935	95.6726563760206	91.8002713361361	97.7050287130606	117.94290364869	120.053038516743	102.36464999363
S397641_002_PanCK-	130.352875178538	167.923126109911	644.847172294684	20.3622589065283	306.892995335192	74.2455176561674	109.409819552637	480.952991877712	43.1268067728664	334.622971752461	254.595353630879	273.17718870213	120.355490302037	78.9202530561247	78.78783586651	212.033874659135	60.9184048222217	392.06892805285	86.8683624480169	288.420926602092	125.536054936256	902.805741197982	738.373720063357	157.464955436027	55.9385637495355	31.0191070129694	87.6562822702771	58.4630046175508	73.0368603879853	135.133746789914	193.349736206676	105.894920366264	1970.91506508117	347.498564477345	230.01461638092	90.7393171204546	123.45030364269	51.2671559649417	1603.86127053212	88.4869544909722	295.012117316147	91.2044990288788	339.974637098925	87.6211556458693	86.6469820768974	75.943351954846	116.301999703941	114.757434934897	78.5439866990602
S397641_003_PanCK-	270.021897548476	346.565025896575	1079.74822403103	37.9582854047644	751.559294612615	178.359739666917	706.333256182229	789.532808270338	78.8711482863633	556.410088570878	743.830846800105	471.381248989324	206.974931775584	161.28297646993	152.83198479383	313.959641882692	121.853343290954	536.208750408817	139.232448062913	431.739824993669	221.288618116208	1457.29677402526	1048.57008028978	289.259528095043	116.056949987792	44.2165972488604	177.202002934285	135.116516612372	168.236156701218	255.784974343478	217.02805985786	193.87169142601	3034.46627160465	560.257736152389	399.429509463873	157.479902964011	193.060868022299	113.124862887513	2456.41274827769	117.258555596578	489.870666841469	140.62190794754	524.400892797194	165.309799937935	160.88858749083	140.117729488722	198.82663987002	199.377110844597	142.952189816912
S397641_004_PanCK-	212.342432558285	331.013416757768	1022.89965160227	52.7864961693672	519.264858068728	140.978159469611	298.239314860729	437.951781300899	55.3136464342827	419.524669812813	476.730930355561	388.926470710966	207.924669205707	96.6380377046926	121.098674764787	188.56584011487	97.0149203236277	454.760683555843	109.528878684597	530.021335127077	155.55015014437	932.156806435277	867.830027964304	267.27095799606	83.2509469321481	50.1579830889967	132.262469701013	117.501727352052	122.432691137618	195.821249082386	174.457632510247	158.813624119064	1912.80666863797	526.085815467661	343.760235399523	122.593845296465	135.70805070553	93.3854899896266	2709.78590083327	111.769366957003	506.773672377619	112.709119927145	503.036340787316	96.2953296169586	135.093575889264	112.014072879694	155.156732207656	117.748614500951	110.651533723469
S397641_005_PanCK-	131.213470410442	557.862704685566	802.380152183614	64.3603054280773	300.578593688965	3119.46672870805	3824.84732578049	516.016083597516	83.6812081820838	410.239611919106	1530.83302257023	469.615019992975	258.796631129333	221.770880078278	257.221328135891	211.971589397313	263.20824446973	425.374942982538	182.496143069016	264.990748516154	240.244290764758	993.870552470582	519.025654409547	320.072889117582	201.628878448518	98.0115740105191	233.712177272355	174.695231193079	204.305120661563	262.784796135241	173.613831528786	255.389401002529	2193.14773093388	410.081969564521	308.077620994616	196.772107811111	258.220145094439	147.413112026314	2522.85519446657	180.688087811459	522.968058500919	149.661613669157	563.551984917972	160.480152921201	160.411563417231	183.432827892498	214.587625738934	198.997332842693	221.038909627297
S397641_006_PanCK-	188.708123404935	384.12602460221	1203.75507328929	60.0191326984276	246.959985352094	1898.64274481613	2495.25724724994	858.307197964607	144.639151405181	619.595072280445	985.015730040226	618.246772097235	280.699526593709	305.774589014869	339.44048451598	418.278037264075	337.614688272693	546.576571005422	253.863974143434	332.659577026822	333.077917142237	1638.78778284822	947.526016749307	362.217664669488	222.98920620364	120.951742267149	340.129722591307	249.96397974732	296.287867998053	383.435517509548	282.674714960268	283.82079559377	4026.82297592169	571.464606714241	552.72921685569	276.712434971491	389.600205849218	190.215392575224	3034.74275513268	297.285524151432	616.965662025434	239.768561753958	578.760363373394	218.724581756724	255.08202160627	230.870843769797	260.299798665302	291.828090113479	288.082662071032
S397641_007_PanCK-	155.551226914282	253.96726970252	1019.41310624972	74.1386747456673	355.391830237351	2563.4437902445	2807.11924299325	1180.1607947168	87.2765854813828	529.738394601885	1015.57994786994	458.966032171575	235.366640619216	186.973653040954	186.300615358379	275.083011471591	177.755153443069	470.928179889631	163.796088020588	205.576065282289	241.926205819103	2093.3546401142	869.899688561577	342.3119481681	139.921846130697	74.6150787646902	173.408644453157	143.257307379349	161.882939346814	232.502156228491	230.456773578156	196.266920995733	5129.1414894909	318.963614926472	434.764038659391	194.845350072716	250.126807522471	153.746741381249	2863.32408999917	189.230106863014	564.86188113184	135.413015412504	436.899570989656	140.17673829456	188.427874632272	153.948024969439	193.622866182981	189.030056925889	173.310664462748
S397641_008_PanCK-	129.157660086978	219.886439204122	990.699570760456	67.65943984798	256.84890490676	2141.86493286422	1902.4779599106	1345.59910853519	79.9579009439199	488.378157760648	886.808202498962	387.65542400743	236.291447660012	143.624599928576	193.381053131363	269.887861236964	137.818393579273	429.670451908987	137.985771655879	196.821898499954	204.814074056647	2155.48213562301	810.534971447856	307.80628245323	135.078082400746	83.2830009537839	182.597422191445	123.932715956463	158.195251199439	215.188524975194	293.357938683495	163.979219859862	5375.09230086503	305.973479037407	449.925759302063	175.26648611454	208.897642698617	107.515867386003	2681.12338824804	104.448642796182	493.377486876599	132.016930005952	496.495579456035	123.630179491994	138.695106321527	134.583225486717	182.300401724959	150.525791104198	146.455469797851
S397641_009_PanCK-	259.690244615344	484.517721178413	5044.28946532977	57.9635189058288	375.152260737767	234.874208880945	2007.01500373193	4522.15376395428	204.640264956255	3106.6267243017	487.57639761368	2176.2905101988	914.678084406479	449.088114703621	465.595018051067	4018.56467373151	600.193457361021	1674.19668123957	454.887542608326	547.191539399964	856.255290479986	6311.41315321253	7985.73393708289	460.1522126335	247.498441721811	165.101068526446	730.607865182161	417.161128057853	556.3662656732	1745.70155735886	614.223227854367	484.63581384536	22891.5862507116	927.915883827756	3671.71805609915	579.526166803509	3104.28117367534	676.846174202498	11496.2578926916	3122.10744773487	1551.24003872148	600.557755477087	1218.8341703285	513.905543310398	403.950343945152	464.979883563504	705.406860461066	569.332505625638	472.137484062518
S397641_010_PanCK-	53.9956801295967	118.999802973734	829.679128607031	19.1800433428957	97.009418954175	109.122536973592	652.915413694776	1210.50585533266	62.4061953957044	640.239934098435	178.803208171971	438.133928611662	150.94822245106	84.1564639052557	118.885672843651	673.332086140888	78.5877526234359	287.625640196888	100.301439638973	97.9813102218091	119.614561111502	1788.7114175842	1063.62846388756	97.8560374031167	64.0834272460895	37.6589667323794	108.191283985613	87.7468167957337	123.178319640321	391.243102026492	115.959109869143	79.6538800388893	6706.3338921509	150.69478500907	480.362744311531	166.077930752368	193.20848289165	164.663125549572	1519.88992469718	1097.77359435054	285.997363188757	92.2943892287342	266.357428495909	112.877307560549	78.6752023783272	83.8900428275325	124.924986761687	122.194025802815	96.7480319431319
S397641_011_PanCK-	20.0969868386101	51.8794790431942	238.786444878777	10.8568325404968	36.8537079448745	159.711168598663	354.44400225518	296.83966063944	16.6627009713366	120.430560774606	88.2179287133316	123.721316336959	44.671965443314	26.9940905611294	35.8906896007168	204.493087605666	26.125800064214	89.3084138828717	29.8818251719966	32.7730959160043	39.4638752046138	430.945528840881	301.841813996642	37.6242465347348	12.0914401459475	12.4960535687456	24.17427689594	32.1991773949178	34.8624443919755	120.590895831371	33.9775592633614	38.1825883563154	1805.85580593483	68.2404316328365	144.767865241418	49.5607790196056	56.7079590145216	54.6696640774424	550.452670330611	297.654903740375	91.0861138922944	22.3429566786539	98.7959377667563	38.4738170145296	37.4584804250893	24.295072325402	39.8897156789974	36.4840778098221	21.7445560713452
S397641_012_PanCK-	64.3701920200939	185.220402547938	889.518824948807	22.8526973762715	145.404482429739	250.955629687854	1075.77667323175	826.292274531986	66.6678045085412	640.312011158836	241.312116040416	431.260015238597	171.404422986258	95.5916904366705	109.542874891607	685.974915951858	89.5932823901694	301.576957053605	123.155592342564	130.752243564769	216.433011248414	1329.42668632994	1247.12762185337	133.576913134914	64.9520749985018	42.8895522369513	115.678045358172	102.155040600874	129.840083669872	332.952856097865	115.862133820747	127.909686572291	5296.17023480199	274.85391158693	600.921821034212	148.632830391736	358.891877183809	163.519594841433	1877.65902091966	629.509145564642	326.808349466879	131.462680573538	264.955224135471	130.442200052506	131.831974863409	119.324414206829	145.090510364946	156.983499006841	92.4901476186432
S398401_001_PanCK-	513.170145569166	214.357189081112	974.947420812415	76.587083911032	484.269358673704	2126.56250847788	856.365089061141	1028.63849808358	134.524468457824	649.408575055262	1639.26283523772	496.35017665325	324.892209867384	251.503162461447	315.275100609413	316.022784059207	345.204597900183	573.995485281103	286.064337925893	407.73778922682	332.687766830895	2266.79059799947	750.088340876919	567.027648640565	238.871434132844	119.814234368816	297.553306235459	244.947754912836	305.829578245325	337.589997243831	287.834688808793	295.279423205838	3847.53482184764	319.377790101488	430.011448996379	299.326594407657	374.840842774013	182.28352895096	2924.63214991183	232.176802458529	584.817488728083	220.642370501876	455.648981206305	272.386795637625	196.710388190597	282.837595144782	256.814710330477	270.535865471571	261.683611530302
S398401_002_PanCK-	484.747950200558	243.920196013143	856.5257283484	81.2389235485174	488.514326133806	2289.48251398279	722.897606354553	893.120778266521	162.843666144548	605.796727728821	1524.46864021764	482.586596897159	279.834810496246	287.152900906239	354.519843391324	317.635053357412	342.198322054393	420.371869057313	263.302870607283	374.972808977581	377.173237238483	2125.87504063994	659.507320777153	480.671365476386	290.299206916379	142.808730296109	330.220181303953	267.341309299804	348.942917454422	321.862717805348	296.270641320961	293.786043574862	3346.21306336117	293.826724491222	403.980998320277	324.001928610532	416.24508158308	214.908093669979	2268.17845238676	251.208079810698	549.845795373061	275.378864466555	416.966941225441	299.766282661857	231.120762656796	266.478366750424	283.41620623947	289.379061096532	236.139275817075
S398401_003_PanCK-	484.075459732597	138.684373233852	1288.46458466782	98.346215612233	429.688377729747	1758.65423387108	371.472974452323	1094.09379431878	57.0342083216064	542.158744618923	1777.26759406974	337.117716842951	243.305022918595	127.461237626531	139.068624037166	204.275438095435	145.987743819217	430.569237811974	123.480663551209	509.470639874139	188.897112760837	2375.90865012328	740.309264469252	578.107818434511	129.638774306006	63.8496664038079	147.645075786664	190.609321058548	172.054540889382	220.740578791748	278.208317509166	165.180366574098	3852.60177316179	229.39755513588	535.760705544205	144.522434392254	189.196890580548	116.084193549277	3453.34770989356	116.082167922048	543.201486333909	128.985765604342	384.530665357882	133.543911838307	115.646604243373	122.060087910166	178.41095446439	137.268297062893	127.147995349238
S398401_004_PanCK-	162.60904272138	229.538034132592	674.633477719605	53.4194361008037	396.417620081526	419.738733091568	2008.11445952757	1232.62680707963	97.3776797455228	611.714371787705	561.632561999521	431.839336431857	241.351545737156	129.560807303876	165.487360634343	312.054852585679	147.963606183327	281.21297148454	175.052280695364	208.176068338003	266.198457542547	3124.2465012669	1087.36022051649	462.965960987296	130.236185515107	85.6338077912062	180.178682931592	195.775152500032	210.588410985862	221.571958063218	302.06437569751	212.914254762701	5154.96611436677	410.408991097983	586.637074912547	218.303387046129	221.342831266544	130.594927520505	2103.16388290941	170.897431630509	378.489385550605	157.392496218361	307.205785935088	209.332979646804	181.304322401853	173.593222053694	201.257567393028	243.348256599188	104.879169567138
S398401_005_PanCK-	93.823528159771	170.491945564897	329.480041501296	32.9547607789932	242.953953828328	381.125971064779	332.642609733841	262.028494486583	99.1489765593238	734.362175450375	265.902113004668	317.55299682333	153.85899711774	124.097600669894	210.112295771021	202.861849047785	167.165997680592	187.938743891141	166.77022245355	183.005663699603	214.567437455632	963.711190416064	419.077372314839	267.492021614756	136.232801678264	83.1264023393428	178.921088599267	190.049159219191	210.795109007449	176.217400096078	222.56992480433	170.505932646228	1173.1857407552	274.218360302864	302.963745135871	187.135406943584	229.750598742671	112.818555408029	551.182889790434	163.730102475517	255.753710741513	149.601807354574	330.787900505313	189.792775644888	175.744070597922	144.903363045902	165.31411389829	221.445280454321	116.553218284713
S398401_006_PanCK-	159.04952781853	335.558592497545	1172.64268360352	60.839138523259	282.406065882217	1264.16653680617	3748.05987891559	1923.18981851924	136.441502263758	978.099615428493	1240.73557689693	523.730286815896	284.045419157245	143.364242594515	195.232900057832	409.503843740628	194.481869919287	455.288768167233	195.083986754823	247.002707771751	269.906497670953	4572.82390983521	1364.2919073209	423.594698784263	162.93354326111	97.527931306728	182.746100388277	262.693356401918	267.097040331115	322.198378969056	505.780991288654	245.706119241092	7876.58151807684	431.745077266082	624.688166642737	215.399467813712	300.18488693431	132.007799595516	3344.01053914771	193.924241786101	553.633695299083	180.307988670425	510.660114278111	250.022928451571	175.573167272674	204.139178211527	216.409710251274	250.22155683302	120.231925494257
S398401_007_PanCK-	166.824045357093	308.491565879126	888.999239860196	65.6828473824019	237.599690758425	1423.32205202152	2715.68717900075	922.747712012055	95.0637859197266	679.930578489642	1142.59836058695	425.54277701658	276.432105800912	162.839552759307	185.642674660598	296.976488863049	189.331597000179	335.865680576575	191.697004796628	210.872568847977	309.050453772205	2135.54792908511	801.282917994886	375.755547802105	145.064509912701	90.4858443785919	190.235956473248	166.404020689589	252.849655082779	272.586045913143	287.485648738822	224.08672138095	3827.28945742921	457.154650909029	486.603837283369	201.356421895319	278.527065429851	132.917458344886	2385.49272314788	227.042793309099	424.056053114774	176.461815164581	383.116688046579	188.843029257537	154.163201847759	169.834829513951	190.159446558664	204.866772155625	147.666255822407
S398401_008_PanCK-	135.960969789152	314.926161263718	740.54531504139	51.1788251308067	207.328891057283	602.740514051549	2074.80798912854	984.323868073191	91.4392639400647	598.25416460765	1013.66919313054	337.986848631172	168.138511145195	111.829295080399	156.296322129033	265.575085303395	146.912275763026	259.620834920991	182.46284023596	184.550811102363	225.683366034979	2041.47228624307	707.21344390384	275.634659061976	122.660543839961	70.1086229432817	166.781825383124	131.928562380987	188.929657068045	169.175381868141	227.834786117607	151.353551904809	3874.64252198345	278.663529080507	500.122388638083	152.744887683998	222.167609339503	105.259100054705	1937.26452943701	153.240983205811	348.957229334018	151.809194114485	295.613537621017	178.545779310879	117.892893687774	140.86256518163	169.528801251046	157.451542051796	102.193583833306
S398401_009_PanCK-	157.496789513319	111.241005350761	567.380960308731	14.3722184864116	86.6681939107901	499.14220600019	900.288577738074	1006.42471787396	39.690108009639	425.167518632862	1502.48030977911	271.369308633683	150.824128660093	74.1856893246127	70.0042906164893	330.429653579698	86.3245834877419	199.054888893016	93.8866989565691	79.8123646103982	171.279465976508	2374.26601787085	937.757603700189	113.325424103366	54.6184980273952	33.7361557184929	128.170660500884	78.193473747866	116.162748804871	238.100736240172	181.771122589812	94.3791987853086	4652.81803984753	176.888946628532	448.403233386019	79.4421036624254	224.824832694404	64.7946941102979	1923.26415467576	114.642130491116	261.299956842606	91.9504973552314	213.67222595892	80.8114903984911	142.524786399684	99.4203056903673	98.6882542575574	244.949616380125	39.9597463096997
S398401_010_PanCK-	111.765190432287	222.481447818514	2207.50324856102	31.040511688947	151.289621318027	85.373894690478	450.122177013123	3798.38698034723	92.1500989900479	1465.49154590787	292.905704589159	783.989391013964	427.585271660865	148.380546038274	180.157580926815	1609.39936842071	291.455491295318	647.394422577665	235.766032247399	225.14335470291	451.124598877278	6066.40759068736	3318.68949264692	246.3871774025	121.836132904922	56.1569974881663	307.046750219542	216.700142010919	238.42820385709	684.768531516942	537.346077048954	266.555050900119	17700.3636355867	495.147021631055	1332.77835534188	307.796419750857	882.018532227481	368.571483354143	4698.34063428612	2564.37593857612	604.977446395832	230.507188340944	527.619544370619	310.669186259814	152.732063251712	208.469694759168	270.20997931322	277.309509186848	139.318306570072
S398401_011_PanCK-	23.4262780956165	78.3543929045006	351.175528394062	3.94660161532713	60.1109476966761	318.74306407991	711.288915395311	649.593503121648	20.662454692772	263.675183911647	229.941133774107	142.438697382071	80.8092049447516	26.3498865131175	32.5781492345114	270.642878089882	38.0967960192418	103.013717301857	37.4701701534039	37.5710093420602	97.9667707520699	1252.50310439393	594.371998519484	71.7035604554543	27.42208784459	19.7705735042324	44.5882628381265	29.7629961092935	57.8013724786499	146.899272094919	78.4784265933545	51.4591349704289	3039.2961790205	94.2836652536984	301.991926804064	61.698279170515	117.784033242362	61.4652757010457	807.18860370823	359.835813990653	107.987954905229	40.241462783966	135.520891033226	63.1050345822449	32.9351395918459	55.6617226187715	69.6069647769534	93.0911146352014	25.3748768016922
S398401_012_PanCK-	46.7144552534116	71.100957579736	233.589079043469	23.2520880798001	101.186879000998	222.316568495541	145.148527385014	211.179820447315	51.6911637551717	535.506051144607	163.497532879671	182.09540233873	73.0349440593234	67.2119216026244	80.114010960987	175.491511374849	87.7864075122221	115.876426863546	93.7112196575251	95.1831313509333	116.573097311811	678.879887688627	276.77238635042	140.318886827676	66.4712178238993	36.5286810751835	87.6258623680303	77.1556961615589	135.845523387667	88.3749011672996	135.092237380645	76.4631298801491	968.202004105148	133.66717093957	178.962064704426	82.8793942780382	115.025138868119	53.3670177736081	386.944978540892	103.865286648624	147.565850589745	76.6124693091713	161.452404439224	96.0945161229571	71.2667343397739	84.8273264653368	84.3637388949246	123.29073289395	55.5980196013266
S398422_001_PanCK-	117.437076530768	186.748395844666	414.156437365594	48.5052056285302	182.148622143911	561.090938625904	356.764975762276	580.552451464317	89.2016822748741	615.386767507162	260.728268924354	381.395698914278	179.277016898663	188.45282179441	224.131437886276	241.759142603359	224.777965698724	230.081155160653	191.46701485346	206.949466185761	228.089287066474	1292.77455965818	553.932719042732	260.457634041853	169.162224132403	93.3743426384656	203.686041044932	189.019681589474	261.701592173934	267.656444715693	323.103745659226	186.273725823542	2113.7212437743	232.935677385686	337.749684387301	205.241238010755	226.103619972014	142.025144208962	846.873616923228	203.170288790017	284.646040088217	213.091082925977	323.186845209596	177.404217531564	161.661866958941	202.34636768768	254.166307482068	182.343467835314	160.55576759696
S398422_002_PanCK-	98.0238648444305	121.021027121838	361.906154274473	32.4672997191479	137.692551069788	326.846293011006	152.299624779196	261.781280000927	63.0722218620188	350.168575596432	204.215102864488	232.483281864609	94.7670583481253	114.174345232549	143.248675358066	107.716940555599	126.279422677273	159.338671569335	115.839720496515	98.432612454825	125.236767212317	602.471632312201	267.445886572466	166.68749670531	89.9865868005536	60.1834522429689	115.128136625221	83.0042861569609	137.28493077524	144.954881941742	159.30957822016	122.676303868654	990.277778483511	116.856987507634	183.185901481319	95.8419734504471	117.56550747054	65.7597593571599	695.389662800211	103.550663271764	210.109010881771	131.038214798919	183.826522118209	114.120260687934	111.05977860556	87.3812591608233	125.309941195262	81.3111328456107	83.0651144558422
S398422_003_PanCK-	318.563614259564	313.238200711651	959.512353369003	103.323761851229	418.20591642955	1712.7964325526	898.968140224454	1233.39967413134	156.233483028261	1303.09680333175	813.65096165309	669.700360254423	307.171111483131	258.053337792211	289.443696609886	410.060747315005	264.334971669266	432.237907061749	269.997707923757	288.716246931803	333.76748634139	2808.0033983727	1311.00728555161	481.246963080238	221.05973225736	92.9943255864077	271.666335192719	288.652409158674	419.778208331344	381.684133166049	578.55029780207	290.320821186256	4685.66809020917	320.358812602511	601.498336777639	254.626368014624	292.899602967078	174.266828593089	2310.64897458098	220.936934266317	500.124806111373	284.437329432707	551.937887222781	261.736977438547	186.948199285667	249.824543997222	290.81815690862	319.367912811071	210.905664715934
S398422_004_PanCK-	232.28840068889	208.496512161889	783.469494755865	77.069459646353	369.560098560393	1148.5779076748	536.492949557114	1175.93965169605	114.539966317369	863.110606719871	509.980341697187	473.744144042017	202.525468464829	196.939005196854	199.511772747275	260.923579742022	157.315001382247	304.515528950881	201.002577895234	207.85107038673	193.103819347649	2274.37506601602	1138.12794414044	361.567433998029	144.461922800691	76.8820639387282	238.881374107363	387.027051149683	279.360191401422	374.965016301942	454.78681417695	192.104822934772	4035.19329901625	223.201090948934	544.270699948974	179.552328121831	171.081350525583	174.369281931831	1723.99990420781	164.068235218831	396.22306014385	217.790711671063	392.853309548645	185.321980576683	150.130779347271	164.54134829277	236.636291964213	189.566162350748	128.207006650118
S398422_005_PanCK-	166.514678809491	421.238105789415	1002.08898647719	74.799704996492	223.526311488831	2474.22178890282	2835.47092098085	1624.30408136536	119.04641545792	760.489758971669	828.35277767883	591.339733707278	236.007987559499	183.514519024418	223.499466271245	394.511060028037	190.132244642317	344.1580291052	230.437544072658	189.036553836474	261.393343132262	2787.63233606281	967.137514415865	320.454539155673	164.184711942182	82.783552835489	196.342596048622	141.266222602565	286.479960409203	274.519052757447	316.748054161296	245.588445158203	5596.86018504804	429.167981425504	594.808234636396	177.990782463403	257.191767134866	142.532304260751	3010.67221144252	254.77807992898	487.779381108601	248.606177410945	423.105219634435	232.381871595198	152.841379288128	210.695363571877	292.598723127692	185.821084538784	164.572960759905
S398422_006_PanCK-	87.5929737815888	282.443986388199	644.15021376716	37.1358688222694	156.762641877948	1553.44898669293	2796.35619709939	603.809991668437	78.7861809564924	522.30707388645	442.883041712175	394.87042355142	178.147372248599	143.386280282439	182.19979871097	210.804383785347	183.303334301406	232.701755678324	156.770853343792	115.355050286151	151.581939224983	1071.77269118133	592.773824923912	190.410294412002	111.728908068932	49.5063557405705	141.558958480798	133.760407899255	174.724947486796	215.398167642033	187.097991055744	159.546386943201	2526.28240383006	258.664693390639	363.017266347726	144.370068998929	166.989633598163	134.313481696305	1856.84933610771	306.162993544558	331.717496571484	170.428732526601	258.213398589887	166.538212929366	118.756470175425	165.508981771305	211.409726969792	123.092339891773	138.555219057313
S398422_007_PanCK-	106.069032521629	264.650897458541	437.656265868008	43.2259309493461	163.734071061786	501.46909570708	1419.98384852734	435.029583459365	145.846715910661	499.875072340345	305.019339411843	364.300135870338	128.506328231852	152.956169913045	242.06354642839	172.124388694866	180.267276806269	227.266176273691	192.260927175503	151.790003220485	219.4648096805	860.089144496385	364.573585777072	221.65845147917	173.402381341794	85.4455759253855	190.221856257769	139.469324513243	219.917298070966	165.132618444003	186.794249356372	191.481997192975	1383.64989325764	203.810821565357	262.037683348634	155.206933687975	194.768414155626	126.996262348736	1373.32166040391	219.717631243549	292.443794660365	210.477686455773	208.904924530508	172.006160142555	155.603397545989	196.036019635478	178.811475191691	166.13804148174	140.364552338104
S398422_008_PanCK-	117.843545502334	247.162785366531	601.938766246854	69.0368586009433	168.775476890797	1160.36091317384	994.400879861579	683.62517137146	92.203134191975	681.664332585489	465.878757012593	480.189810960414	193.481090710626	181.380431582987	218.702380634488	251.278290583019	196.111955788919	314.074682112296	205.75285976274	159.228389746736	249.433529097867	1405.67143716415	623.350250607002	265.86509225814	147.126419634262	88.3818760182983	185.132094428586	152.533354591963	264.882725478394	235.118876538974	311.905244971336	198.062192832827	2464.41653186859	285.572997037237	423.486974405938	194.942099501928	254.614834811596	127.647740816643	1606.64242104827	178.811243641105	338.97318330898	196.709776321025	369.306946197487	202.303555572906	159.17108815882	181.055541181479	180.133231917478	172.86065328507	172.40070719185
S398422_009_PanCK-	71.3451247776919	191.710596006449	1630.9774067833	48.9802291012641	122.48787553346	250.829541145433	1432.28422610191	2317.9806529952	57.0202362579275	1019.45871074572	295.042749012999	587.779645325193	246.520721025377	108.928374880907	135.404272968326	872.965397856212	101.031375160733	407.146827266999	146.741695404226	131.540557895583	258.504027698235	2717.94074370757	1792.79315833962	122.57159739906	79.2838067907147	32.4026459869921	107.256575182597	108.539259102978	189.444974836768	570.19105040644	177.475967065607	157.060843727961	10324.9593832215	205.970551334111	1044.30691428896	194.323265096838	255.02679605649	314.523056240494	3304.75387221267	2239.07977416359	383.78743403915	297.813315441822	326.27259373627	186.743215696892	101.890473668617	152.202907352907	261.453947226658	142.73071037259	123.154439868513
S398422_010_PanCK-	103.020121741485	236.224686851222	1866.96885056816	43.6836528131147	159.738768179024	236.9368441897	1570.80753600626	2401.32388968948	80.3242476248564	1479.88832940502	302.762033577182	804.86134567063	290.654913738273	133.204551830859	178.095282142512	1180.90701662744	160.784638335324	461.878803783901	213.967761079163	206.600130371518	367.372767211437	3368.5555660558	2416.33831149402	232.126138690085	112.189758954166	45.5142101657698	220.877367467687	159.466968139924	262.857752888119	633.236223713468	248.229893564178	226.56249492656	11065.558051301	304.29115844471	1320.05886596871	245.257596473987	526.201356598361	325.945480786485	4026.82918062795	1832.74605718656	509.792700660252	229.389305327243	405.333043196829	266.245427060907	150.184573578921	171.065316342258	310.081792831776	149.818256720718	153.581445332267
S398422_011_PanCK-	108.659384638442	266.429976584168	1444.99926428324	52.2360763522732	147.331522371641	222.133811378697	1519.01138040939	1982.83613181232	77.259157019672	1222.63057783346	397.738924899968	729.950684593438	268.039248998658	152.425850126332	182.662381506809	1047.34969186617	204.485985061637	340.699346160747	179.005709647286	181.909898864292	440.164294173415	2969.46359889757	2379.61663693682	209.344501808651	101.424529195644	48.9682431781731	307.021199131762	147.51249952538	274.148474211708	579.44891325841	290.651145975741	232.015268429783	7546.92085995191	285.861463301362	1248.6596969333	180.48918353477	676.222037428259	211.981712416343	3407.35723915893	756.783174184085	478.892551868517	250.046225520064	389.951348549809	205.114999326195	123.310638670184	191.02011374419	241.010204585313	213.553316732527	98.8245817085803
S398422_012_PanCK-	131.531102047333	332.051430232778	1862.45735218721	35.5724994778962	249.197401999974	301.903536308686	1411.94044156308	2882.80997604299	122.331755106683	1419.75979865134	414.810753572644	889.266975582731	355.901031051814	175.222730228689	219.901209770591	1322.64426138526	223.418352552015	497.682617114885	257.209783674314	256.187125712868	518.324066827313	4252.24556688724	2864.37499168577	282.779024466011	117.087478894833	63.055900015574	271.279897827934	192.37918119956	357.728815572153	709.672934112235	535.951684430776	315.15773497883	11957.2639769001	562.889628099856	1598.55650547039	273.699727041715	648.2573188428	360.093130053059	4221.09169557002	2133.19993590351	543.375821701948	267.458542771846	482.114932076034	267.232903615798	160.066008307893	228.488276123578	332.059526674686	222.635512652086	164.889954469029
[truncated: 56 more columns]
